# Supplementary material for: Synthesis and anti-mycobacterial activity of glycosyl sulfamides of arabinofuranose
Source: Royal Society of Chemistry journal article supplement (doi:10.1039/c5ob02317c), 2016-01-01

## Supporting Information

### Synthesis and anti-mycobacterial activity of glycosyl sulfamides of arabinofuranose

Kajitha Suthagar<sup>a</sup> and Antony J. Fairbanks<sup>\*a,b</sup>

<sup>a</sup> Department of Chemistry, University of Canterbury, Private Bag 4800, Christchurch 8140, New Zealand. Fax: +64 3364 2110; Tel: +64 3364 3097; E-mail: [antony.fairbanks@canterbury.ac.nz](mailto:antony.fairbanks@canterbury.ac.nz)

<sup>b</sup> Biomolecular Interaction Centre, University of Canterbury, Private Bag 4800, Christchurch 8140, New Zealand.

# 1,2,3-Tri-*O*-acetyl-D-arabinofuranose

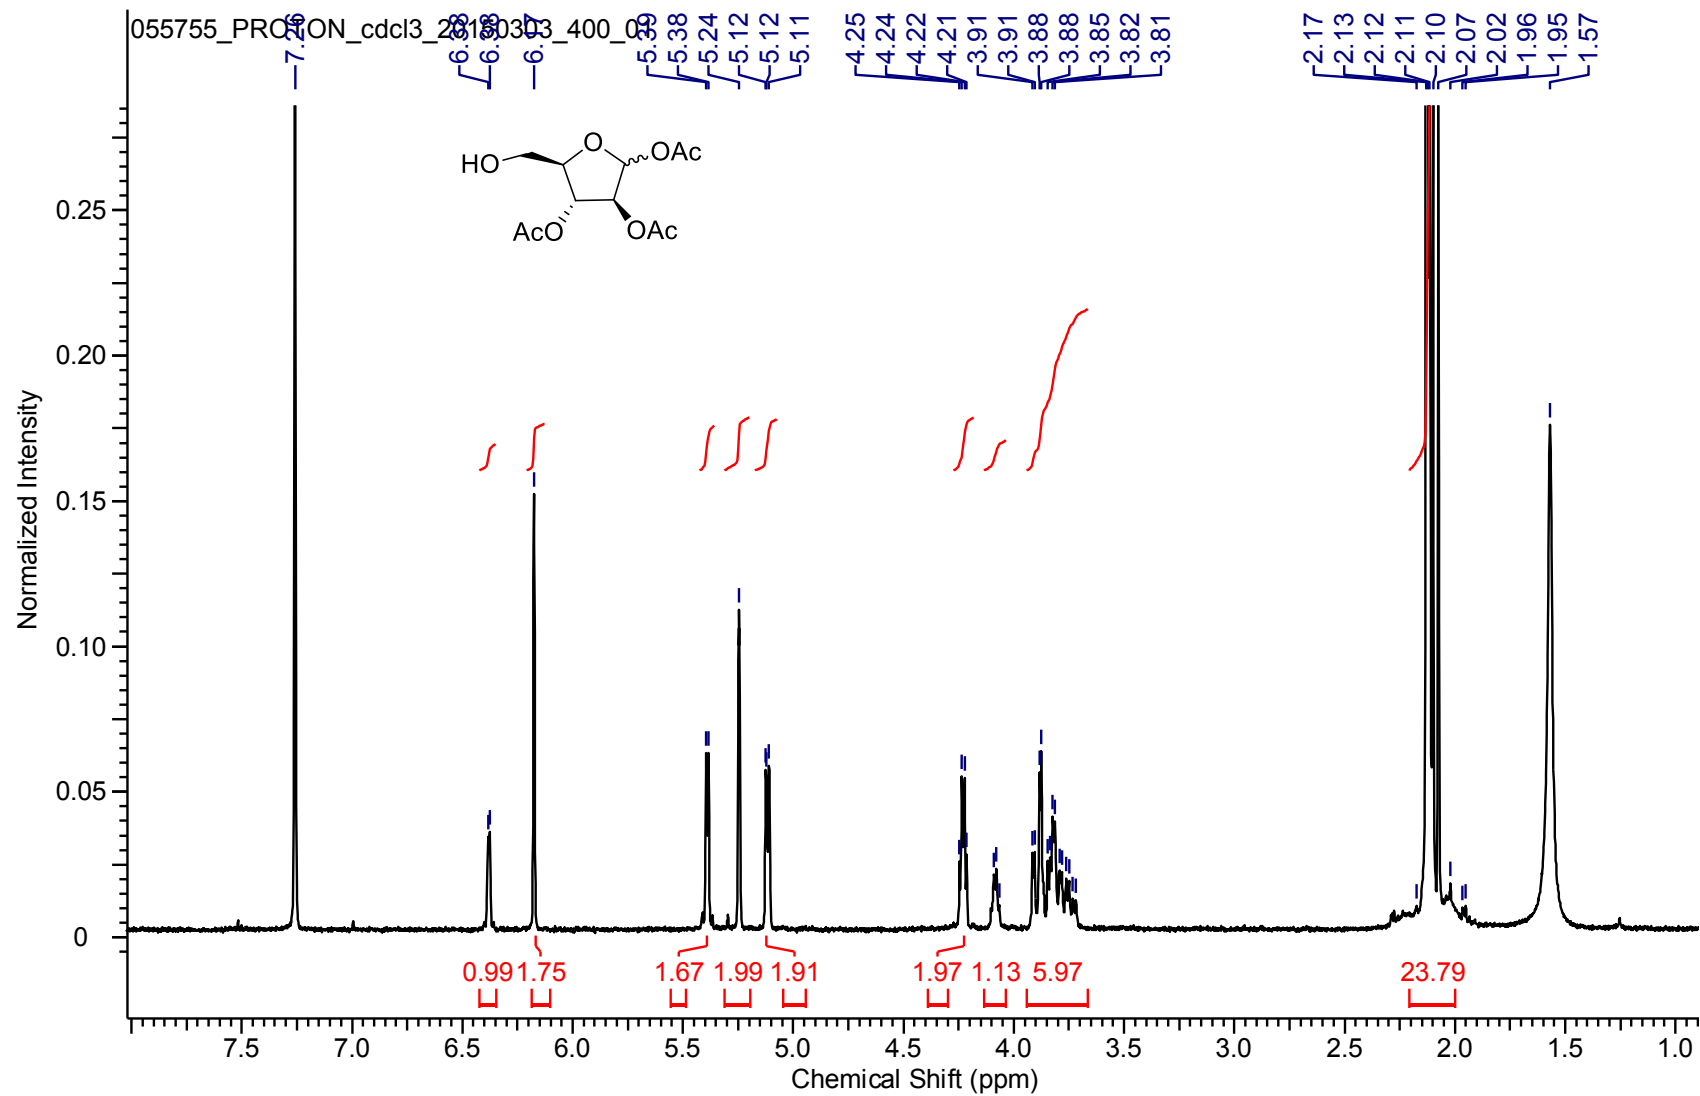

1,2,3-Tri-*O*-acetyl-5-*O*-methyl-D-arabinofuranose 3a

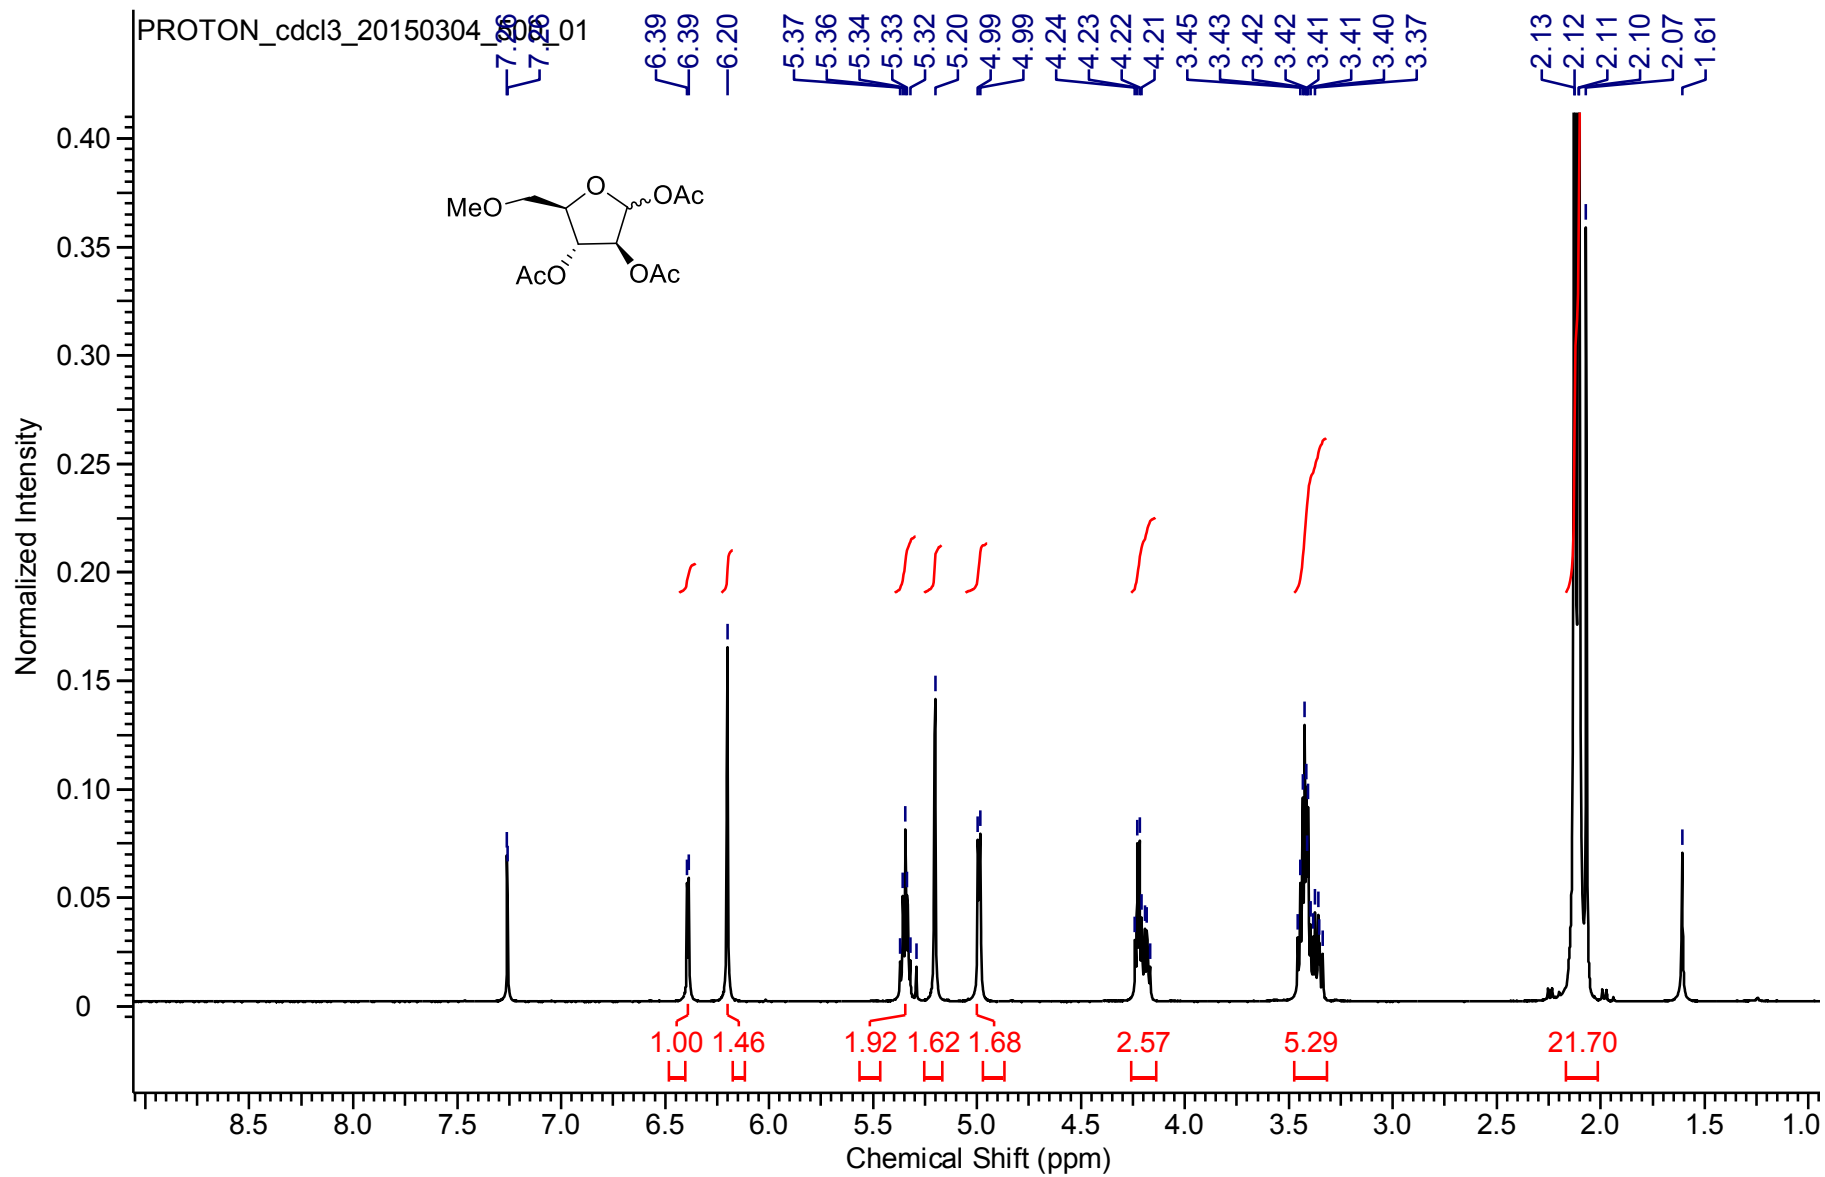

# 1,2,3-Tri-*O*-acetyl-5-iodo-5-deoxy-D-arabinofuranose

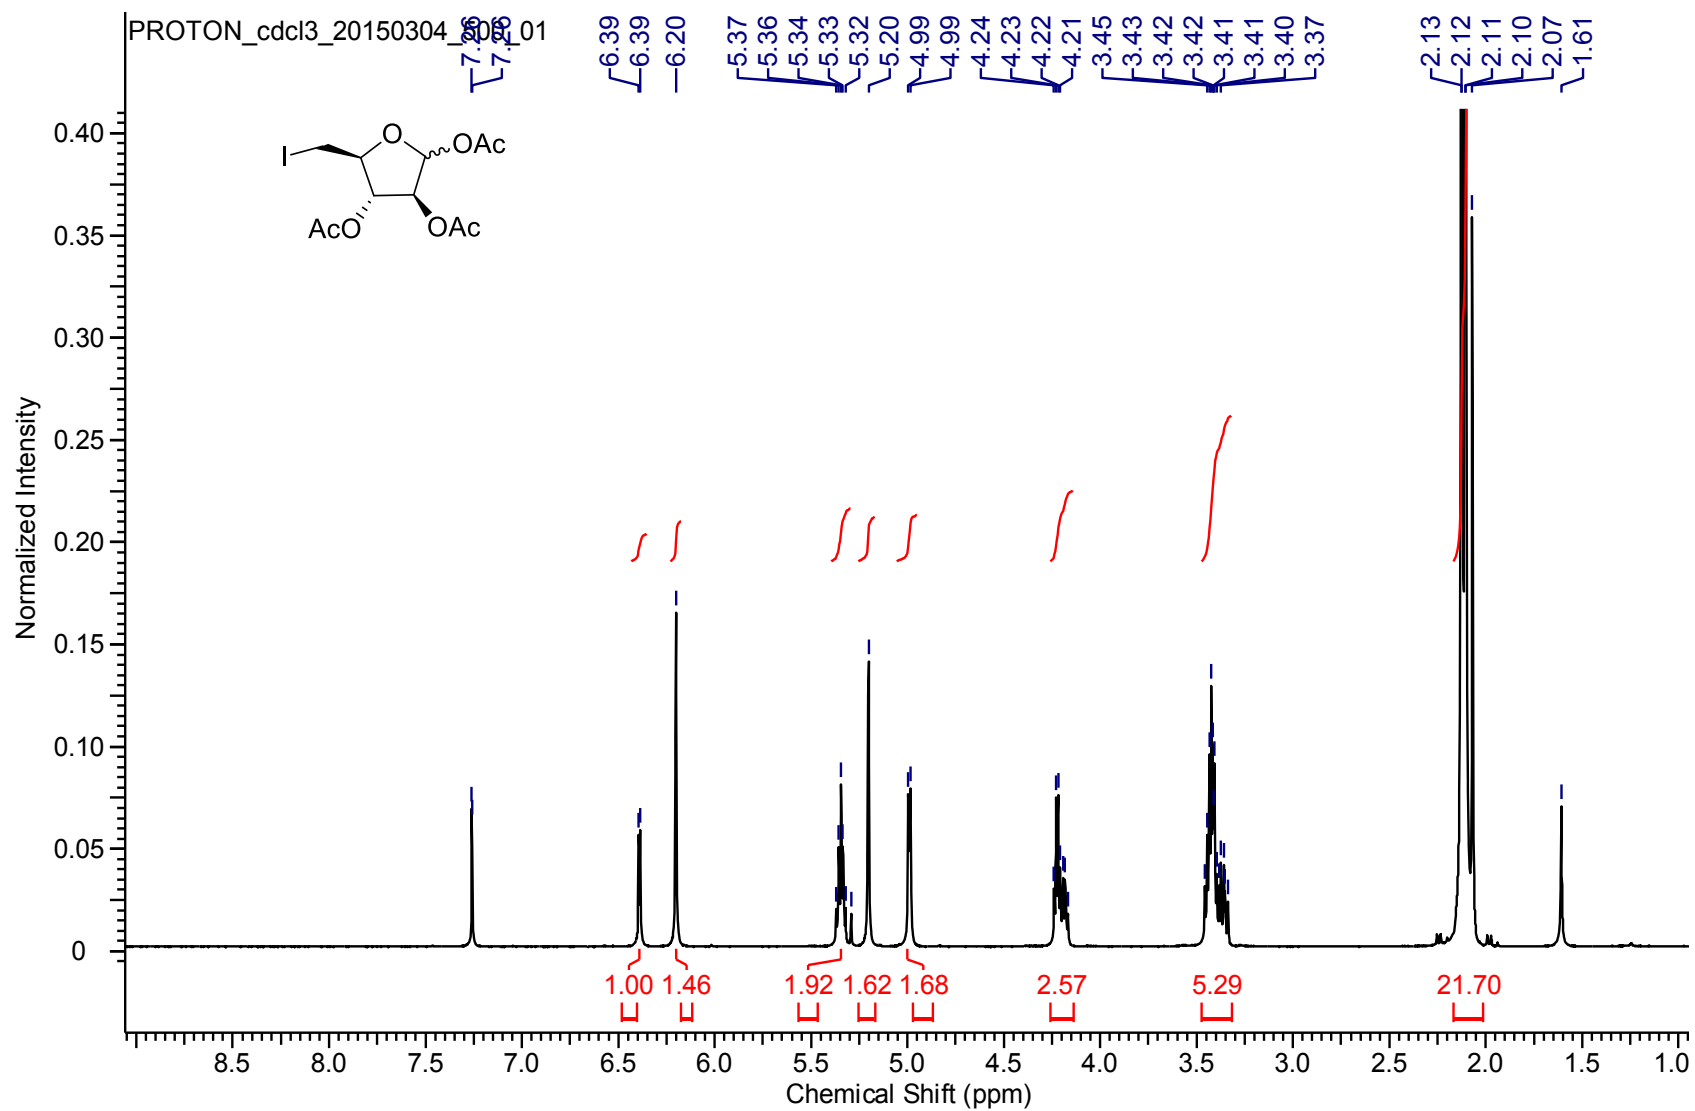

1,2,3-Tri-*O*-acetyl-5-deoxy-D-arabinofuranose 3b

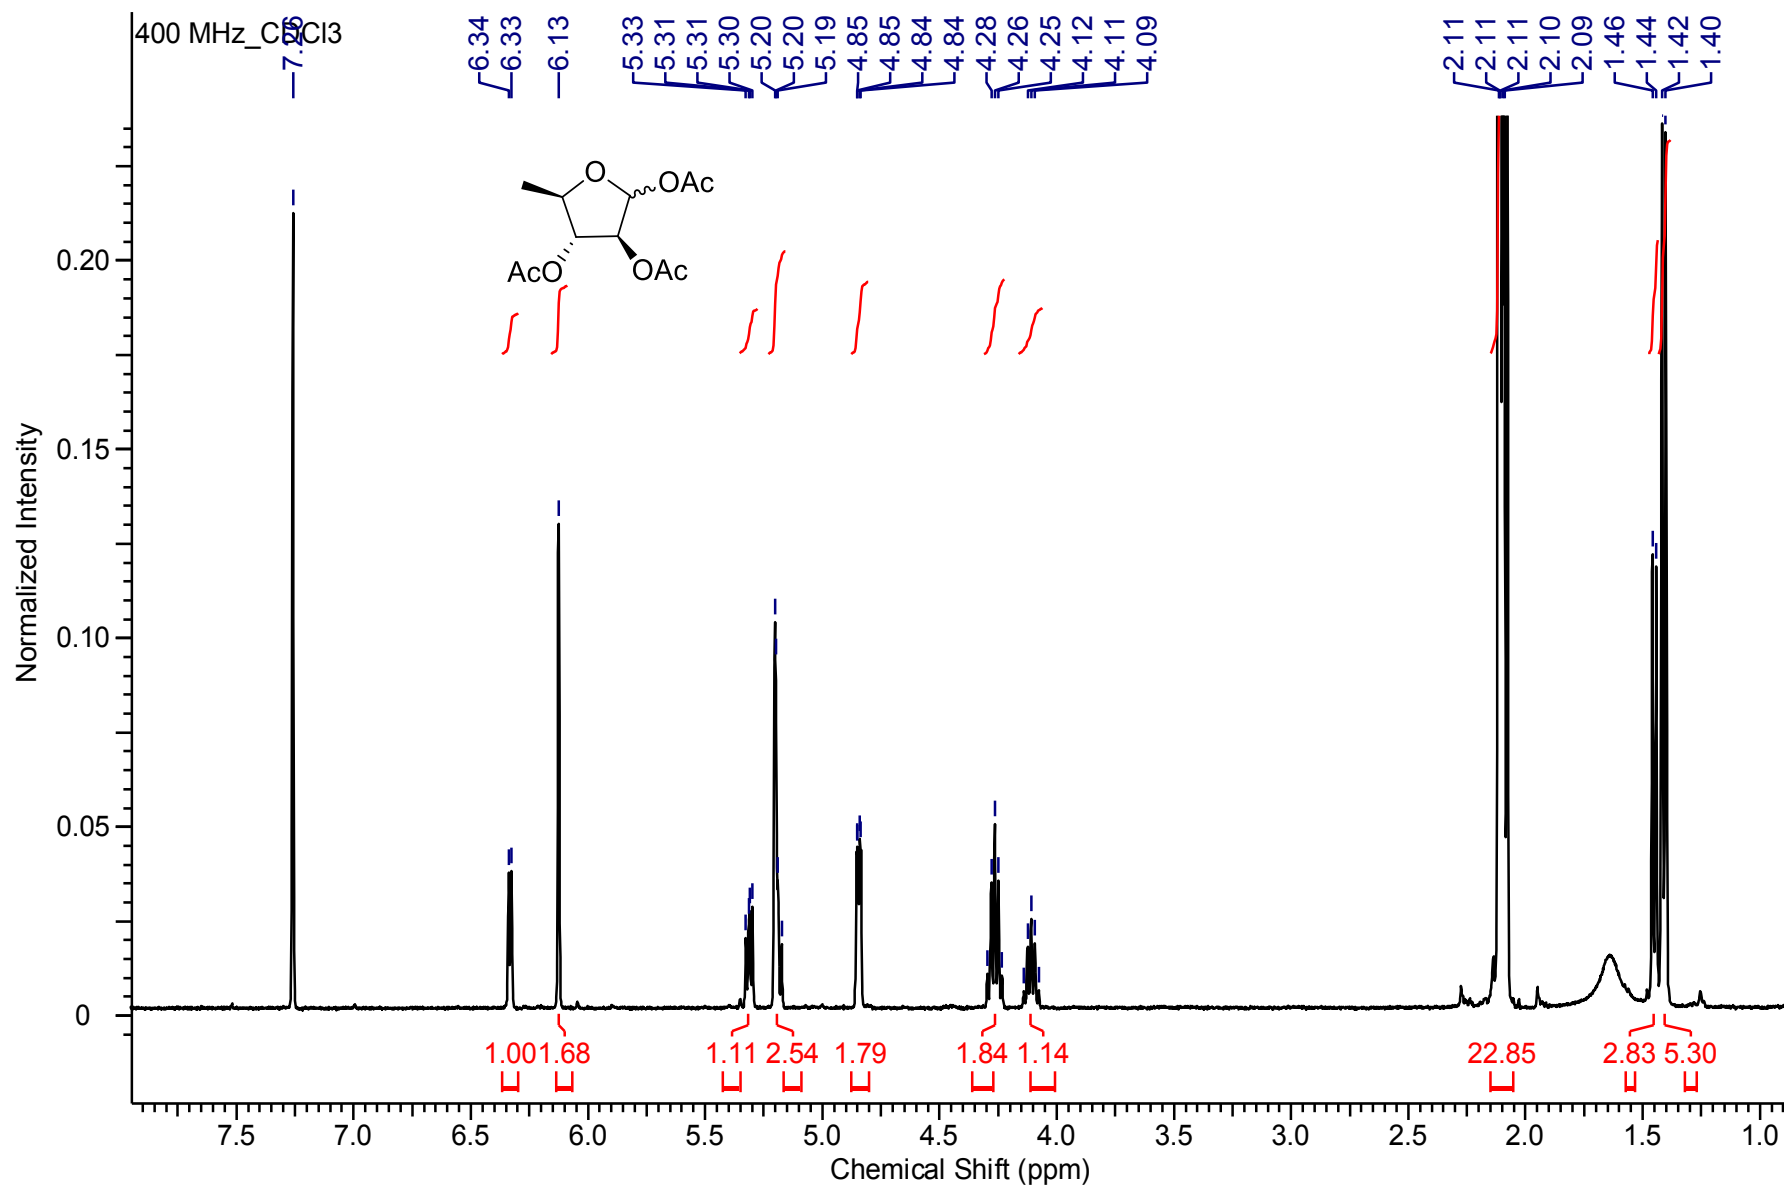

# 1,2,3-Tri-*O*-acetyl-5-fluoro-5-deoxy-D-arabinofuranose 6

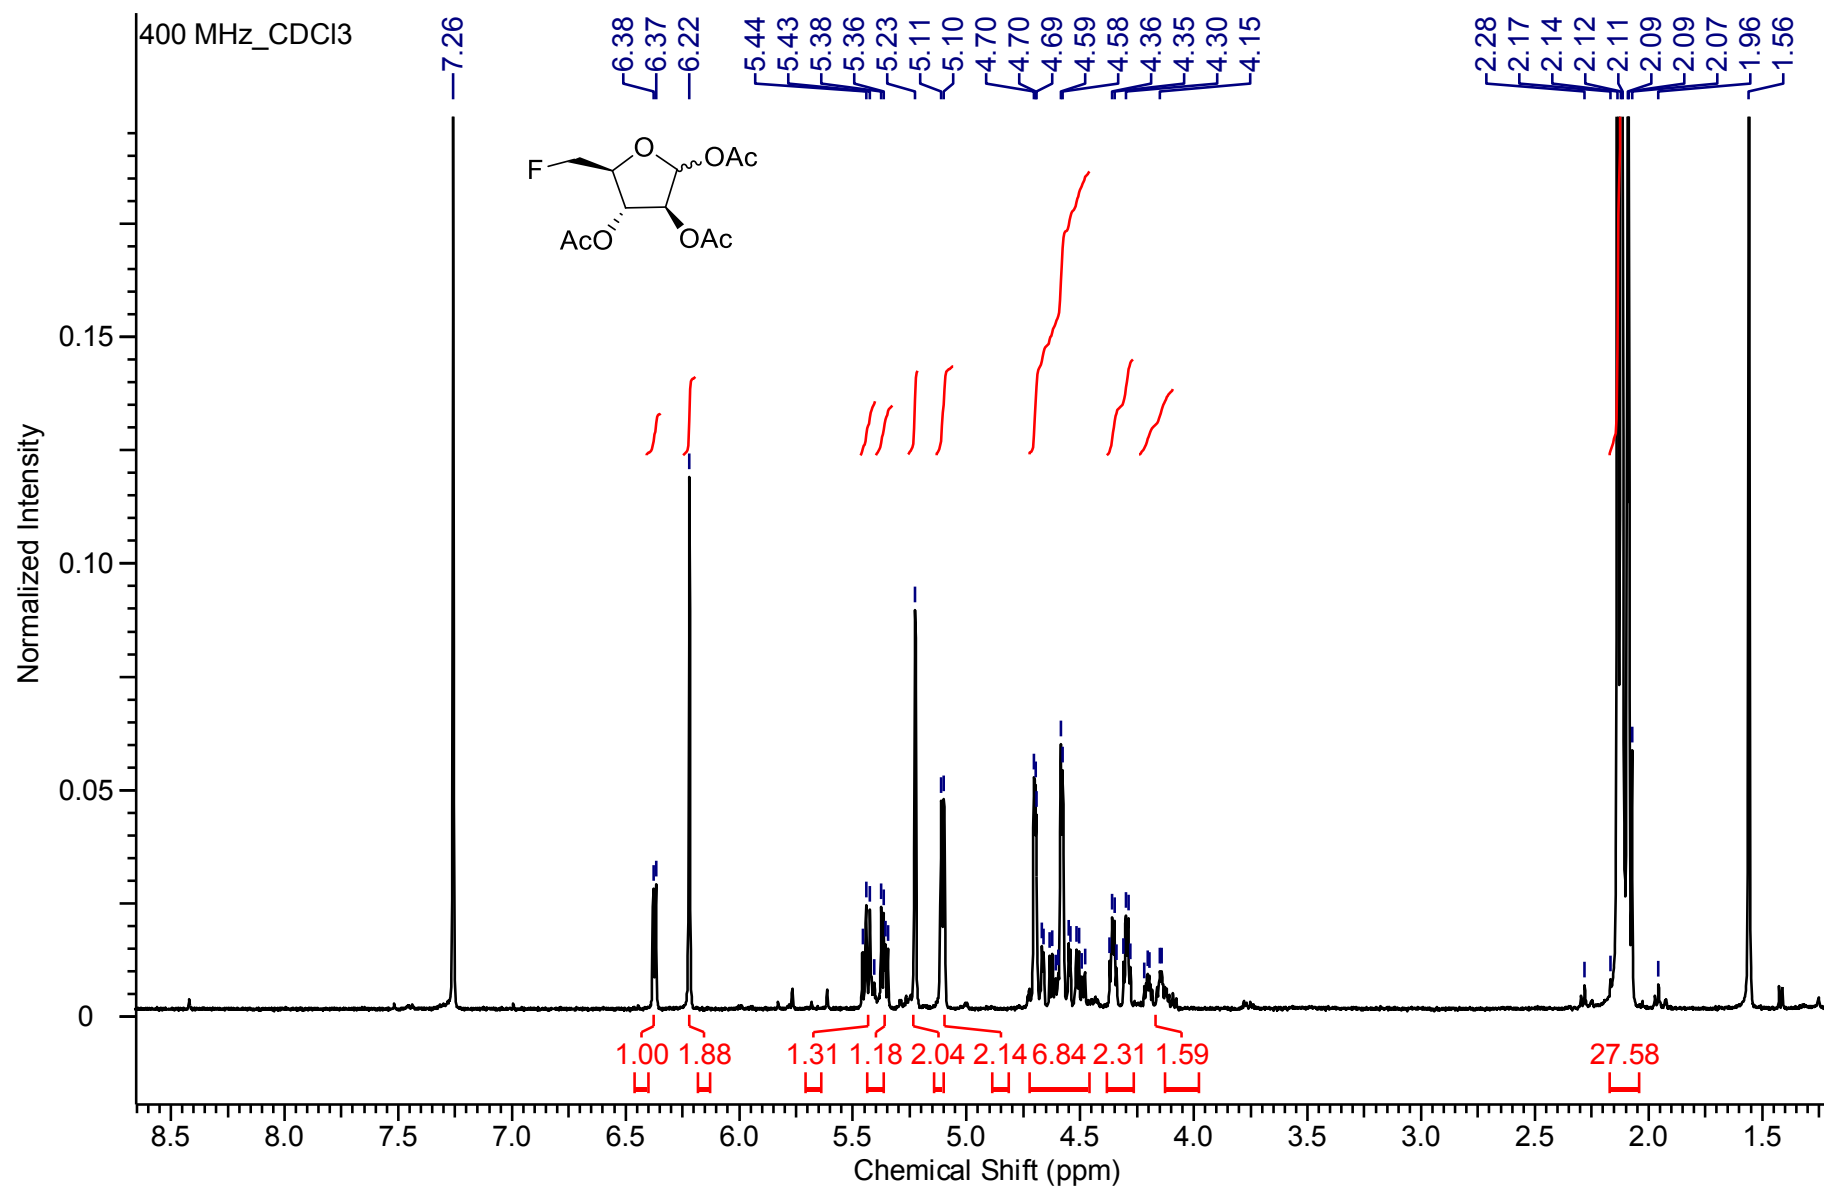

1,2,3-Tri-*O*-acetyl-5-*O*-tosyl-D-arabinofuranose

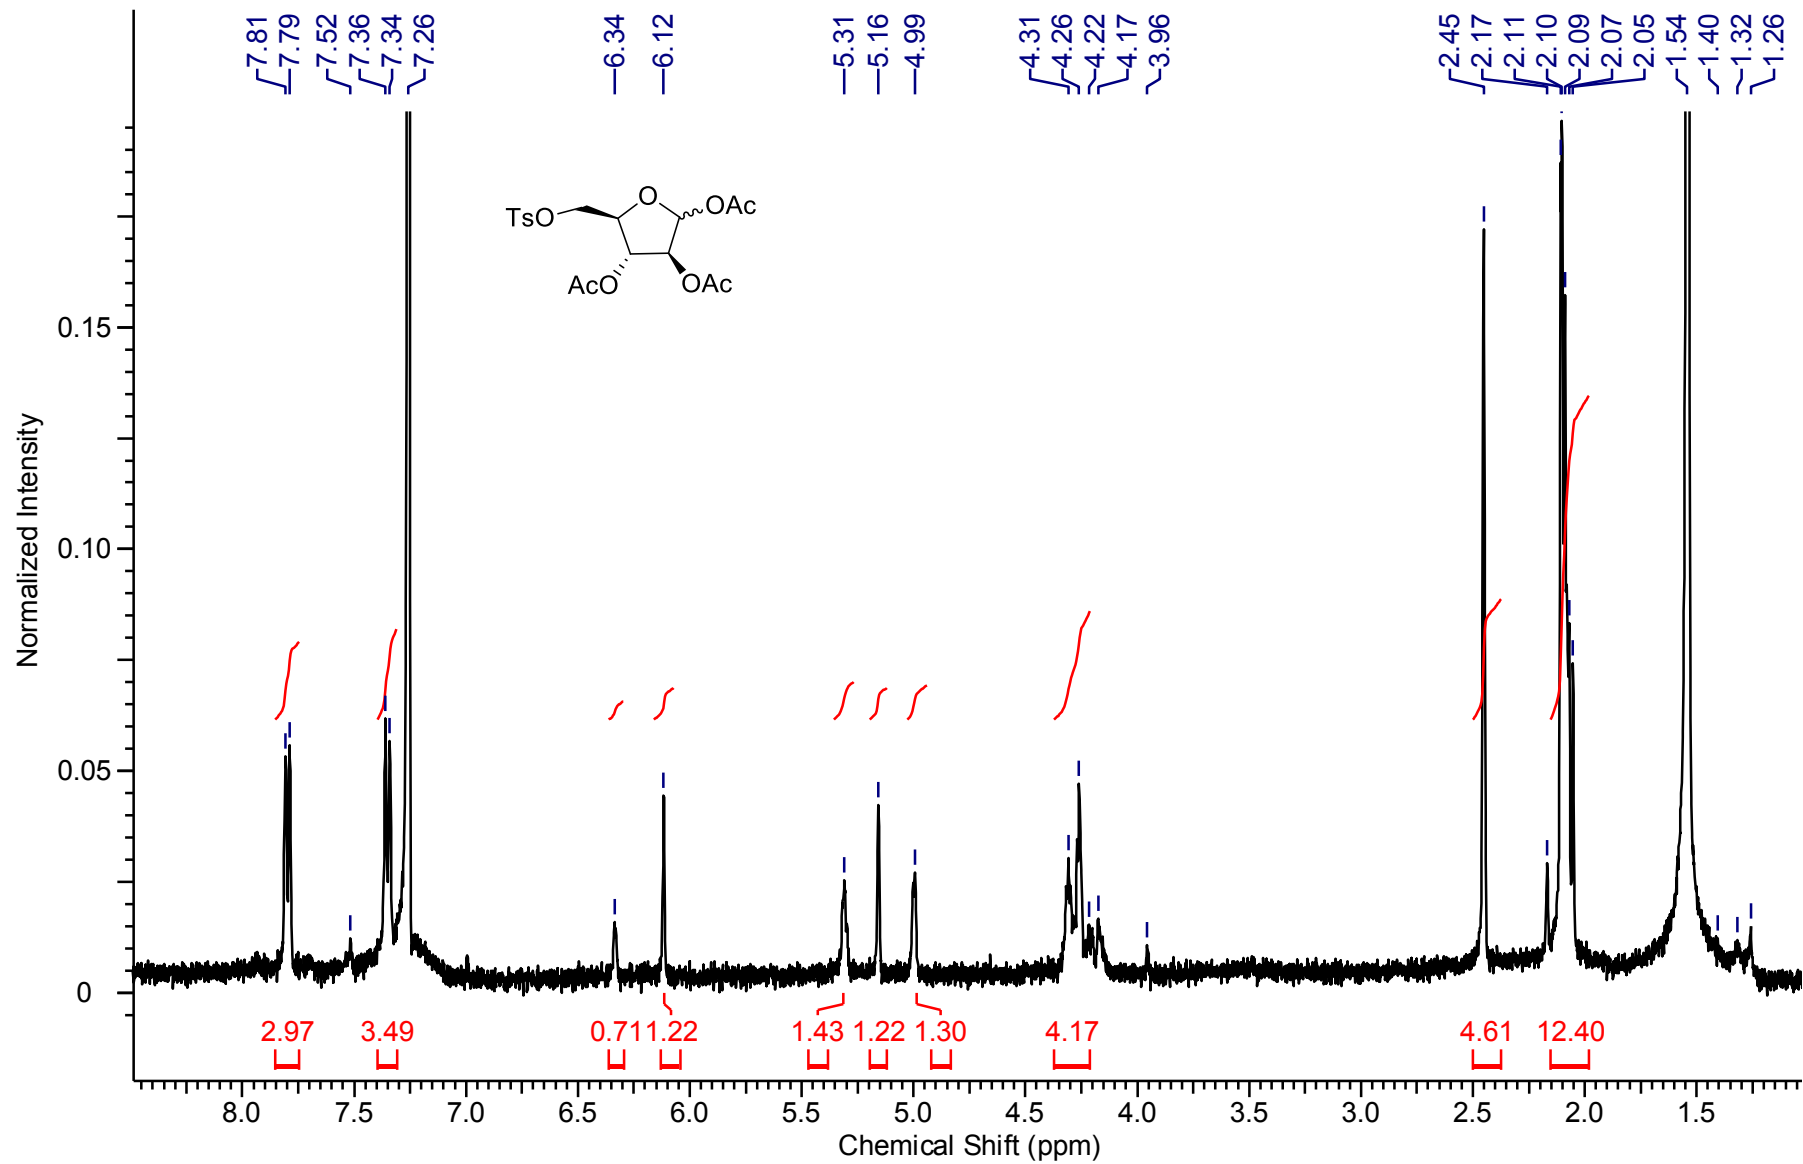

1,2,3-Tri-*O*-acetyl-5-azido-5-deoxy-D-arabinofuranose **3c**

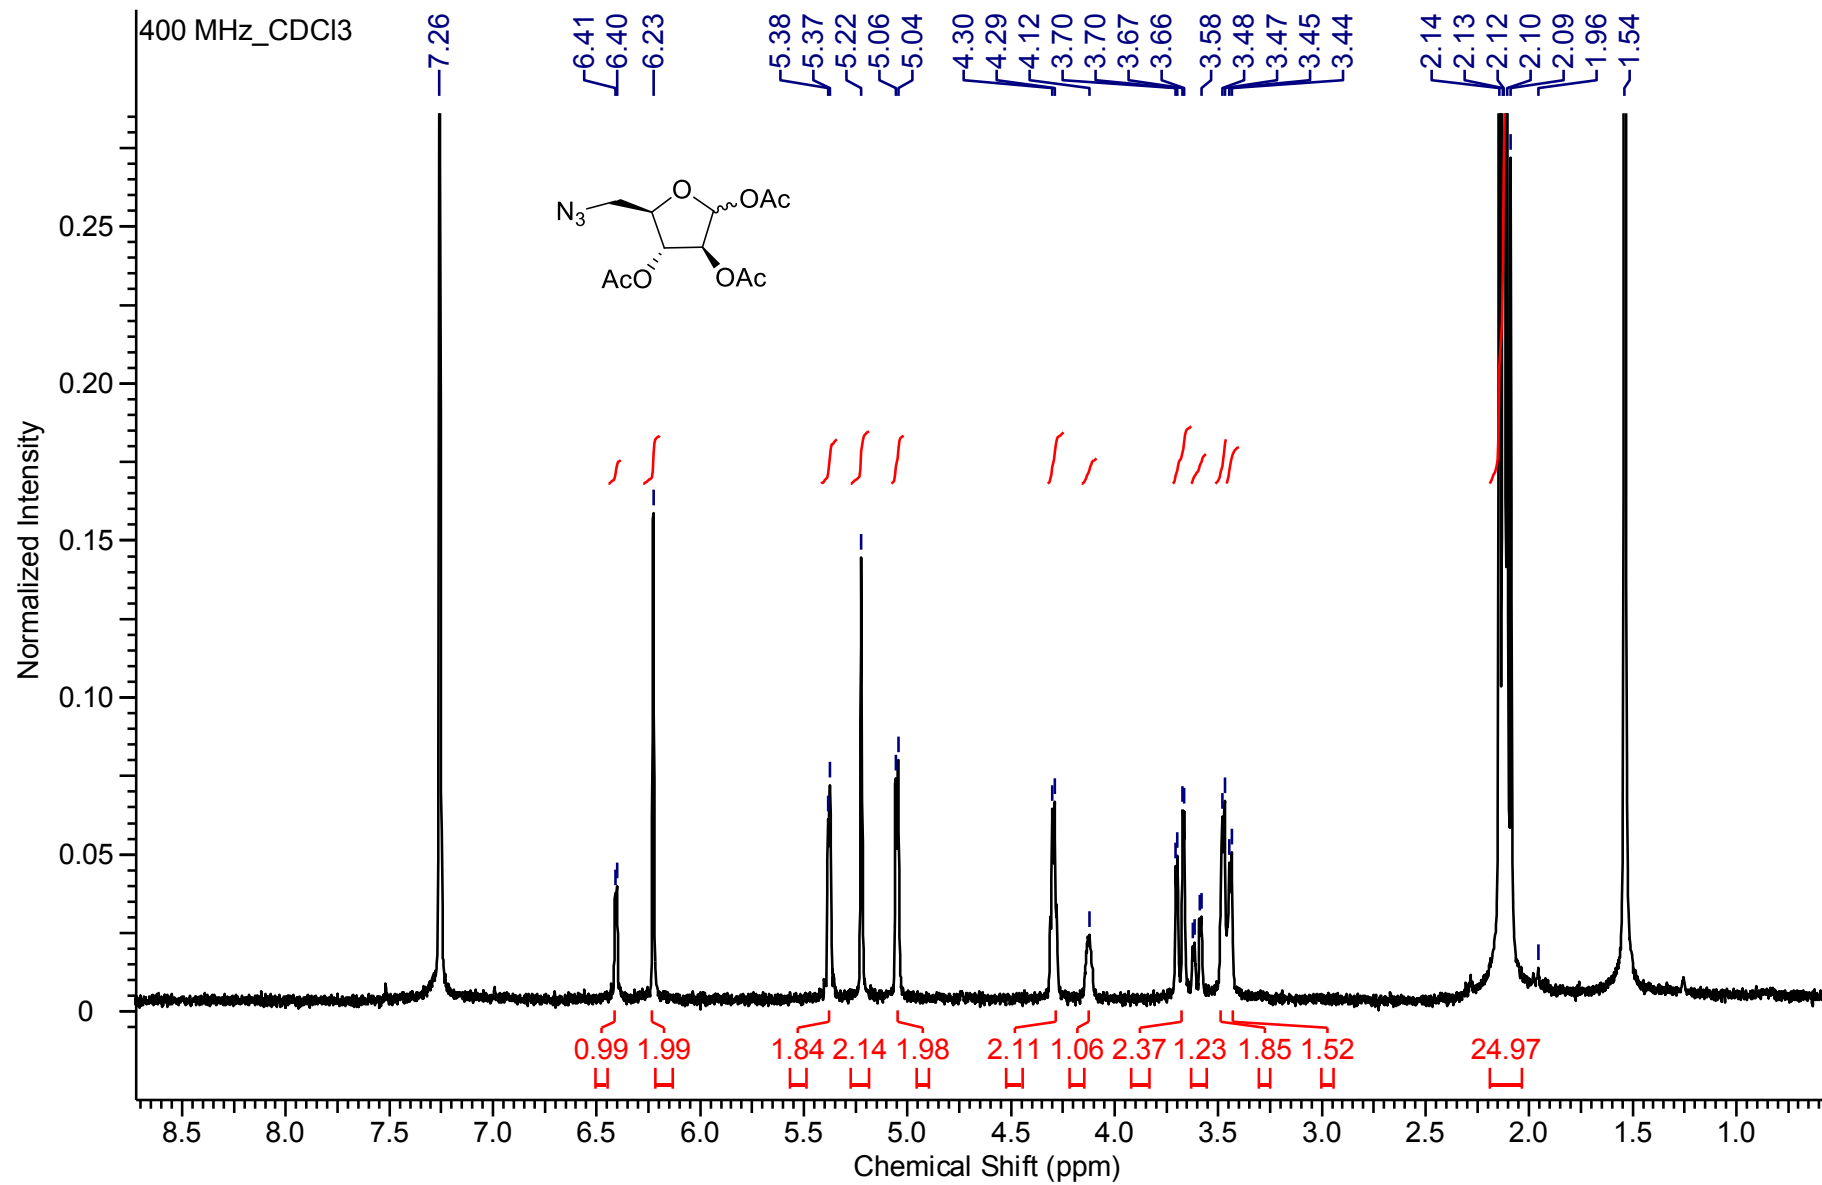



***N*-(Decyl)-*N'*-(2,3-di-*O*-acetyl-5-*O*-methyl- $\alpha,\beta$ -D-arabinofuranosyl)sulfamide 4a**

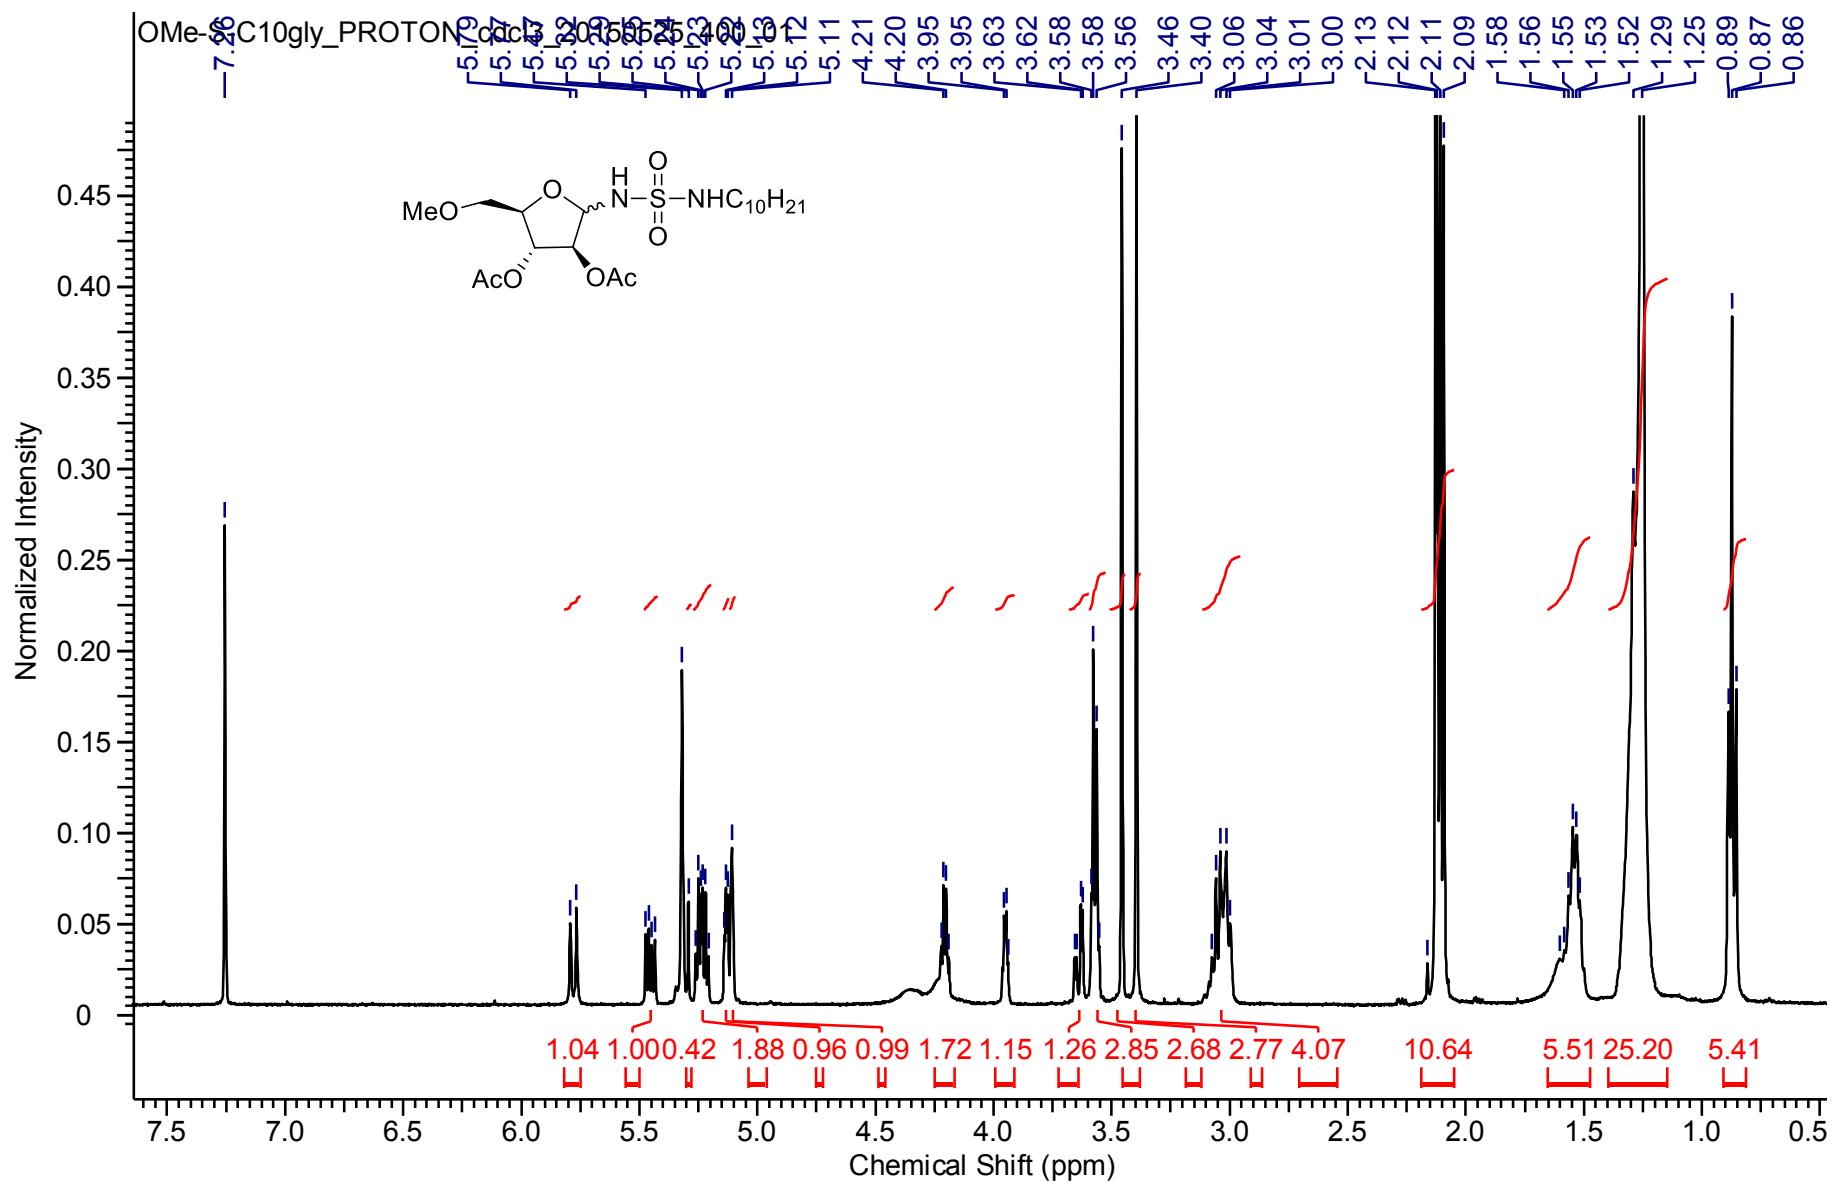

ON Me S C 10gly\_CARBO<sub>N</sub>\_cdcl<sub>3</sub>\_20150527\_400\_01

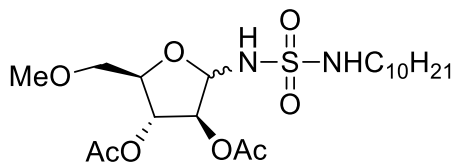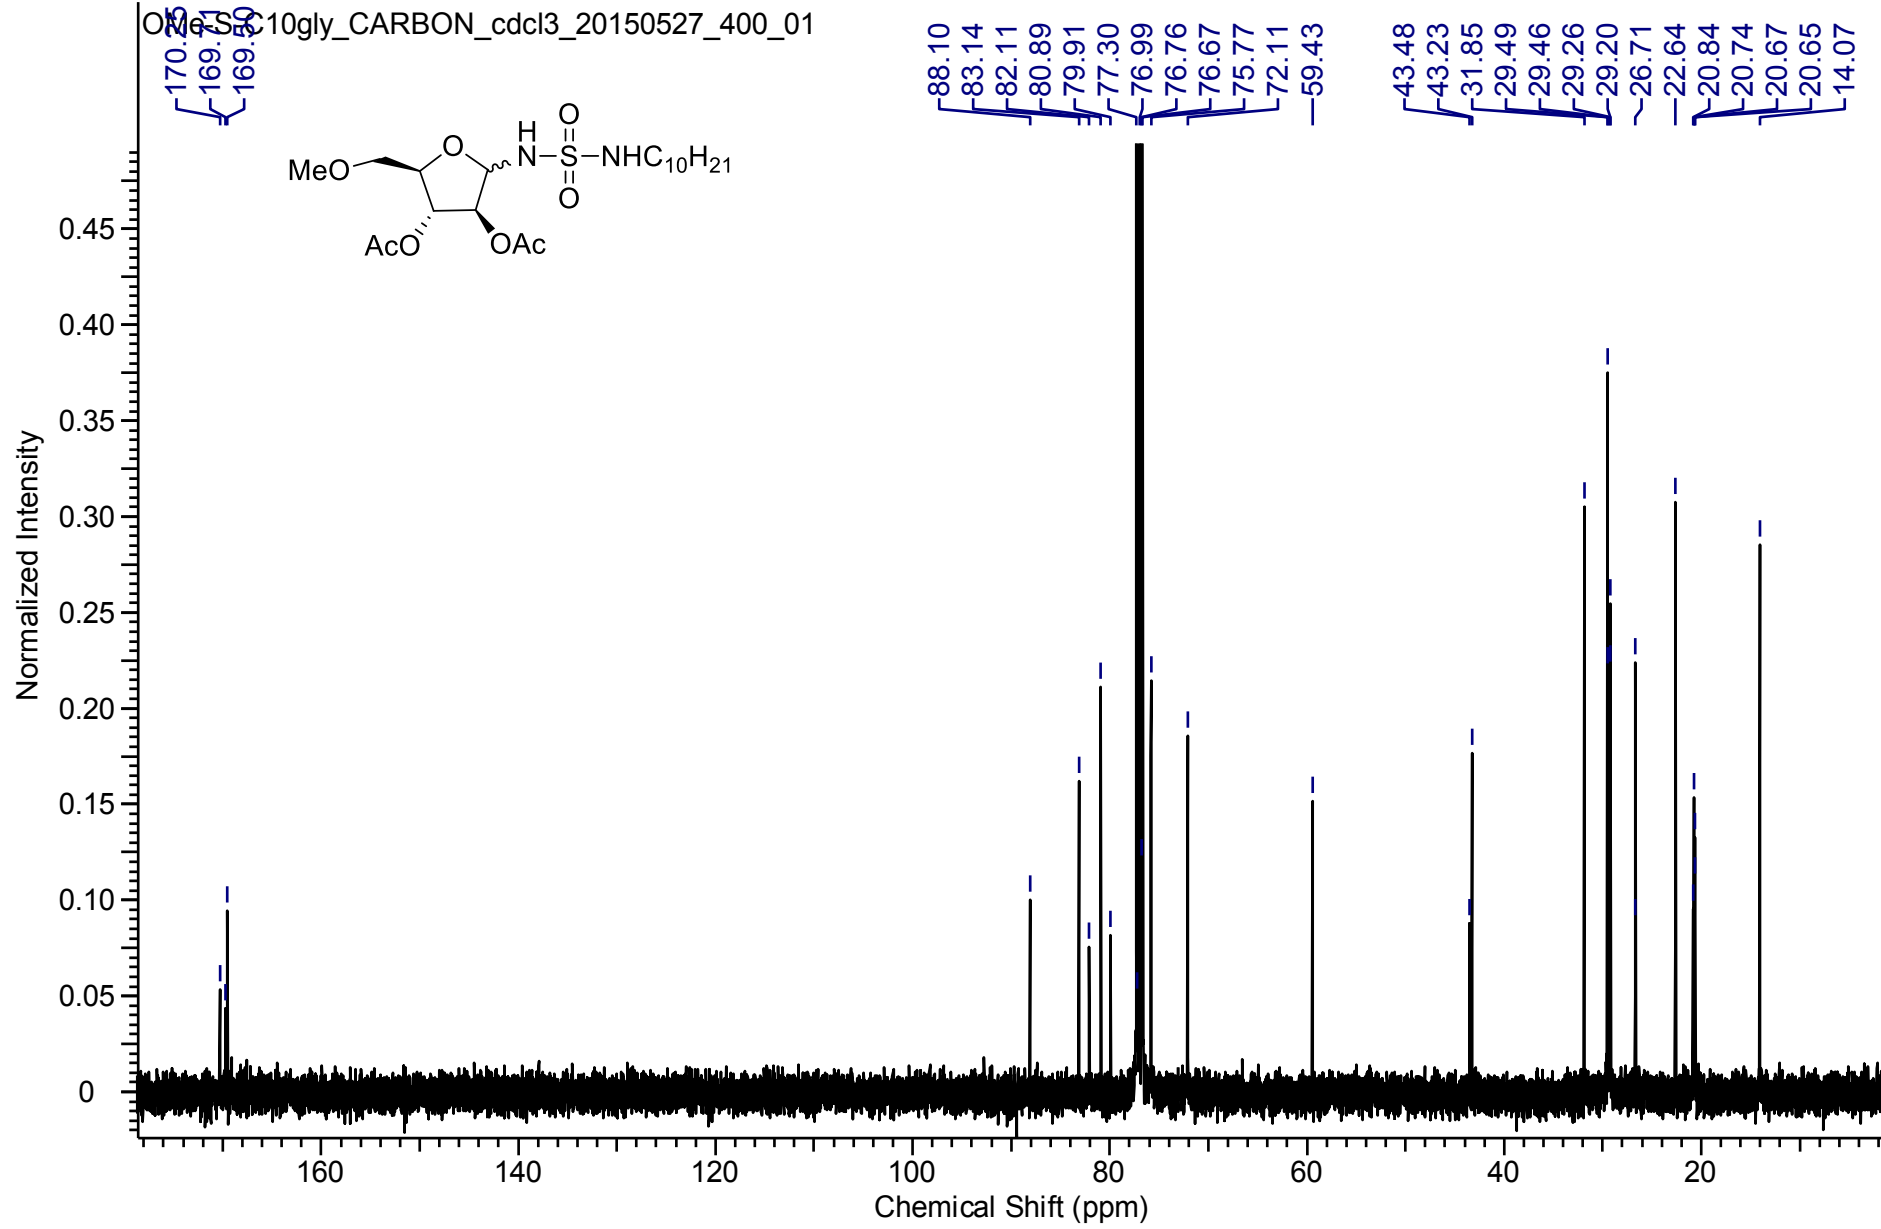

***N*-(Decyl)-*N'*-(2,3-di-*O*-acetyl-5-deoxy- $\alpha,\beta$ -D-arabinofuranosyl)sulfamide 4b**

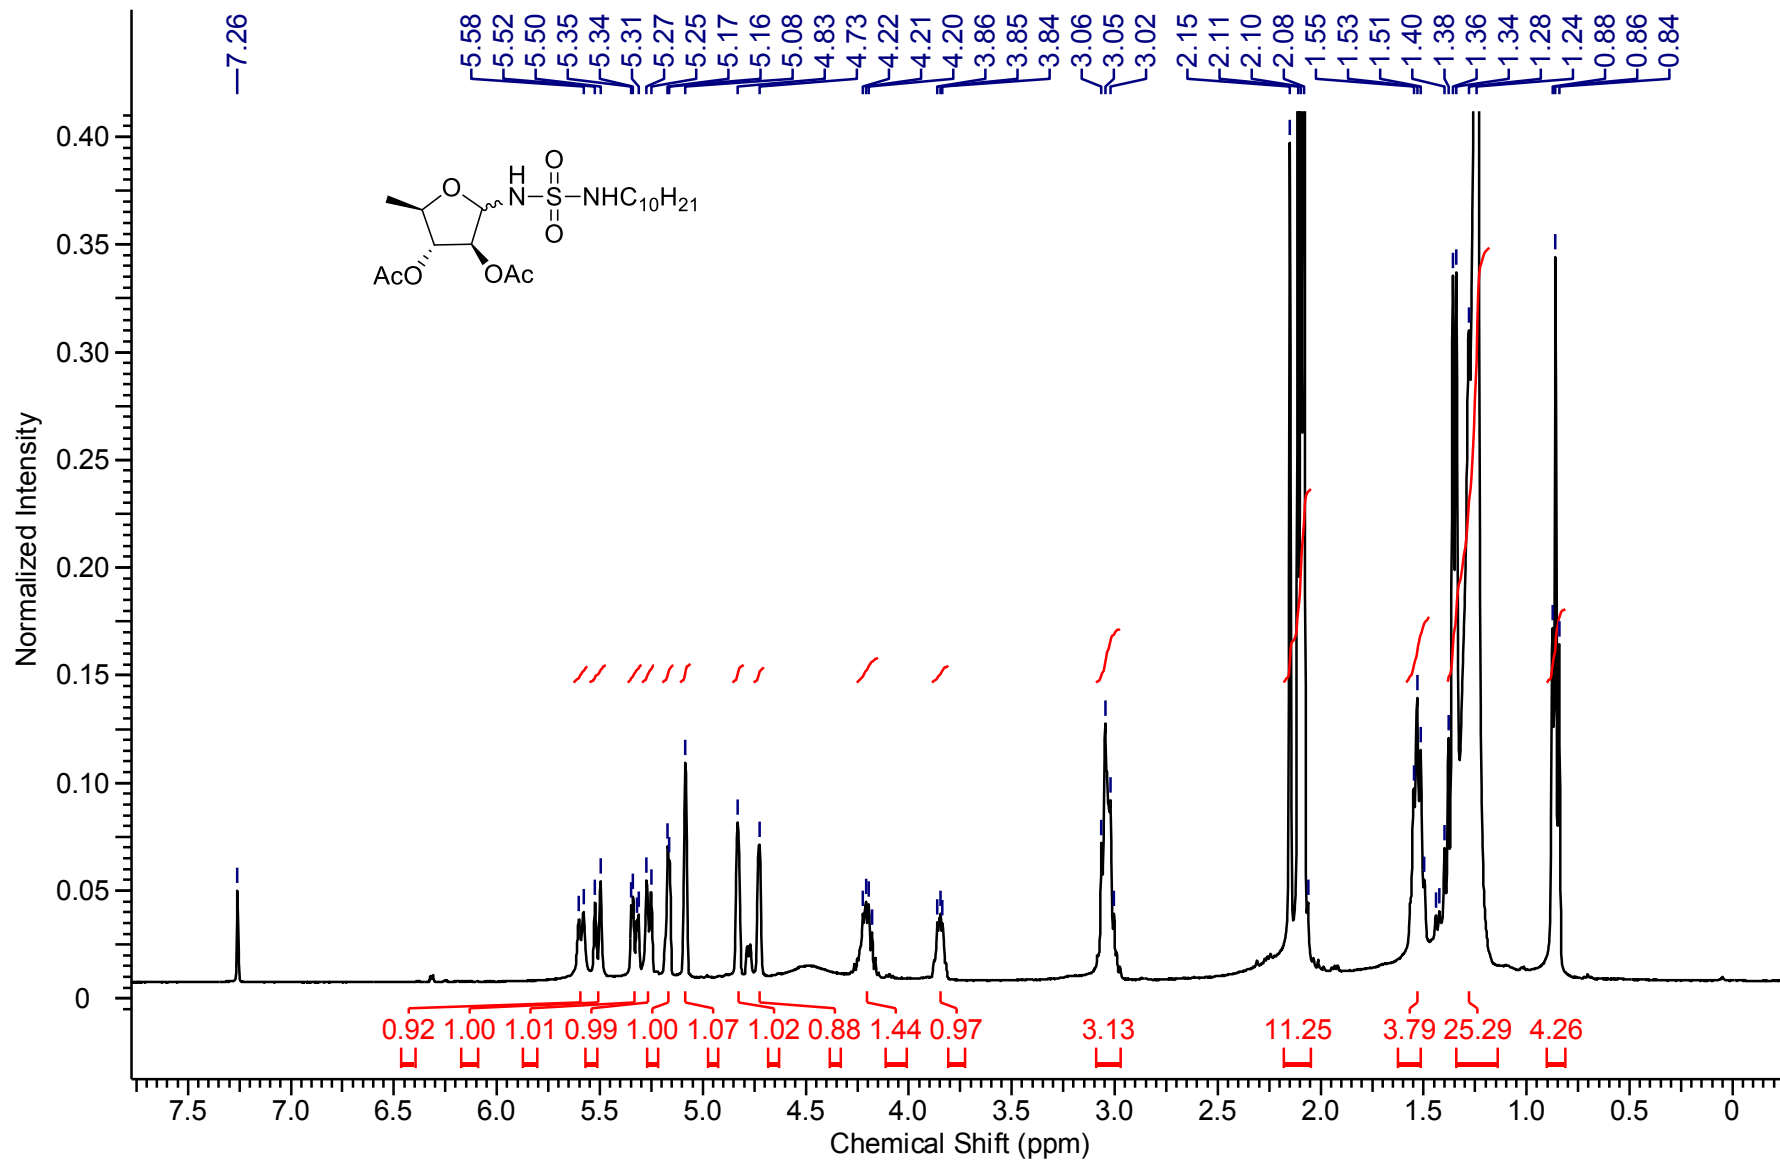

glyc...Me\_CARBON\_cdcl3\_20150328\_400\_01.esp

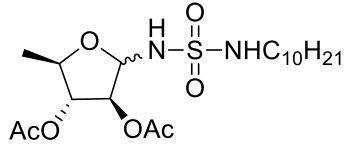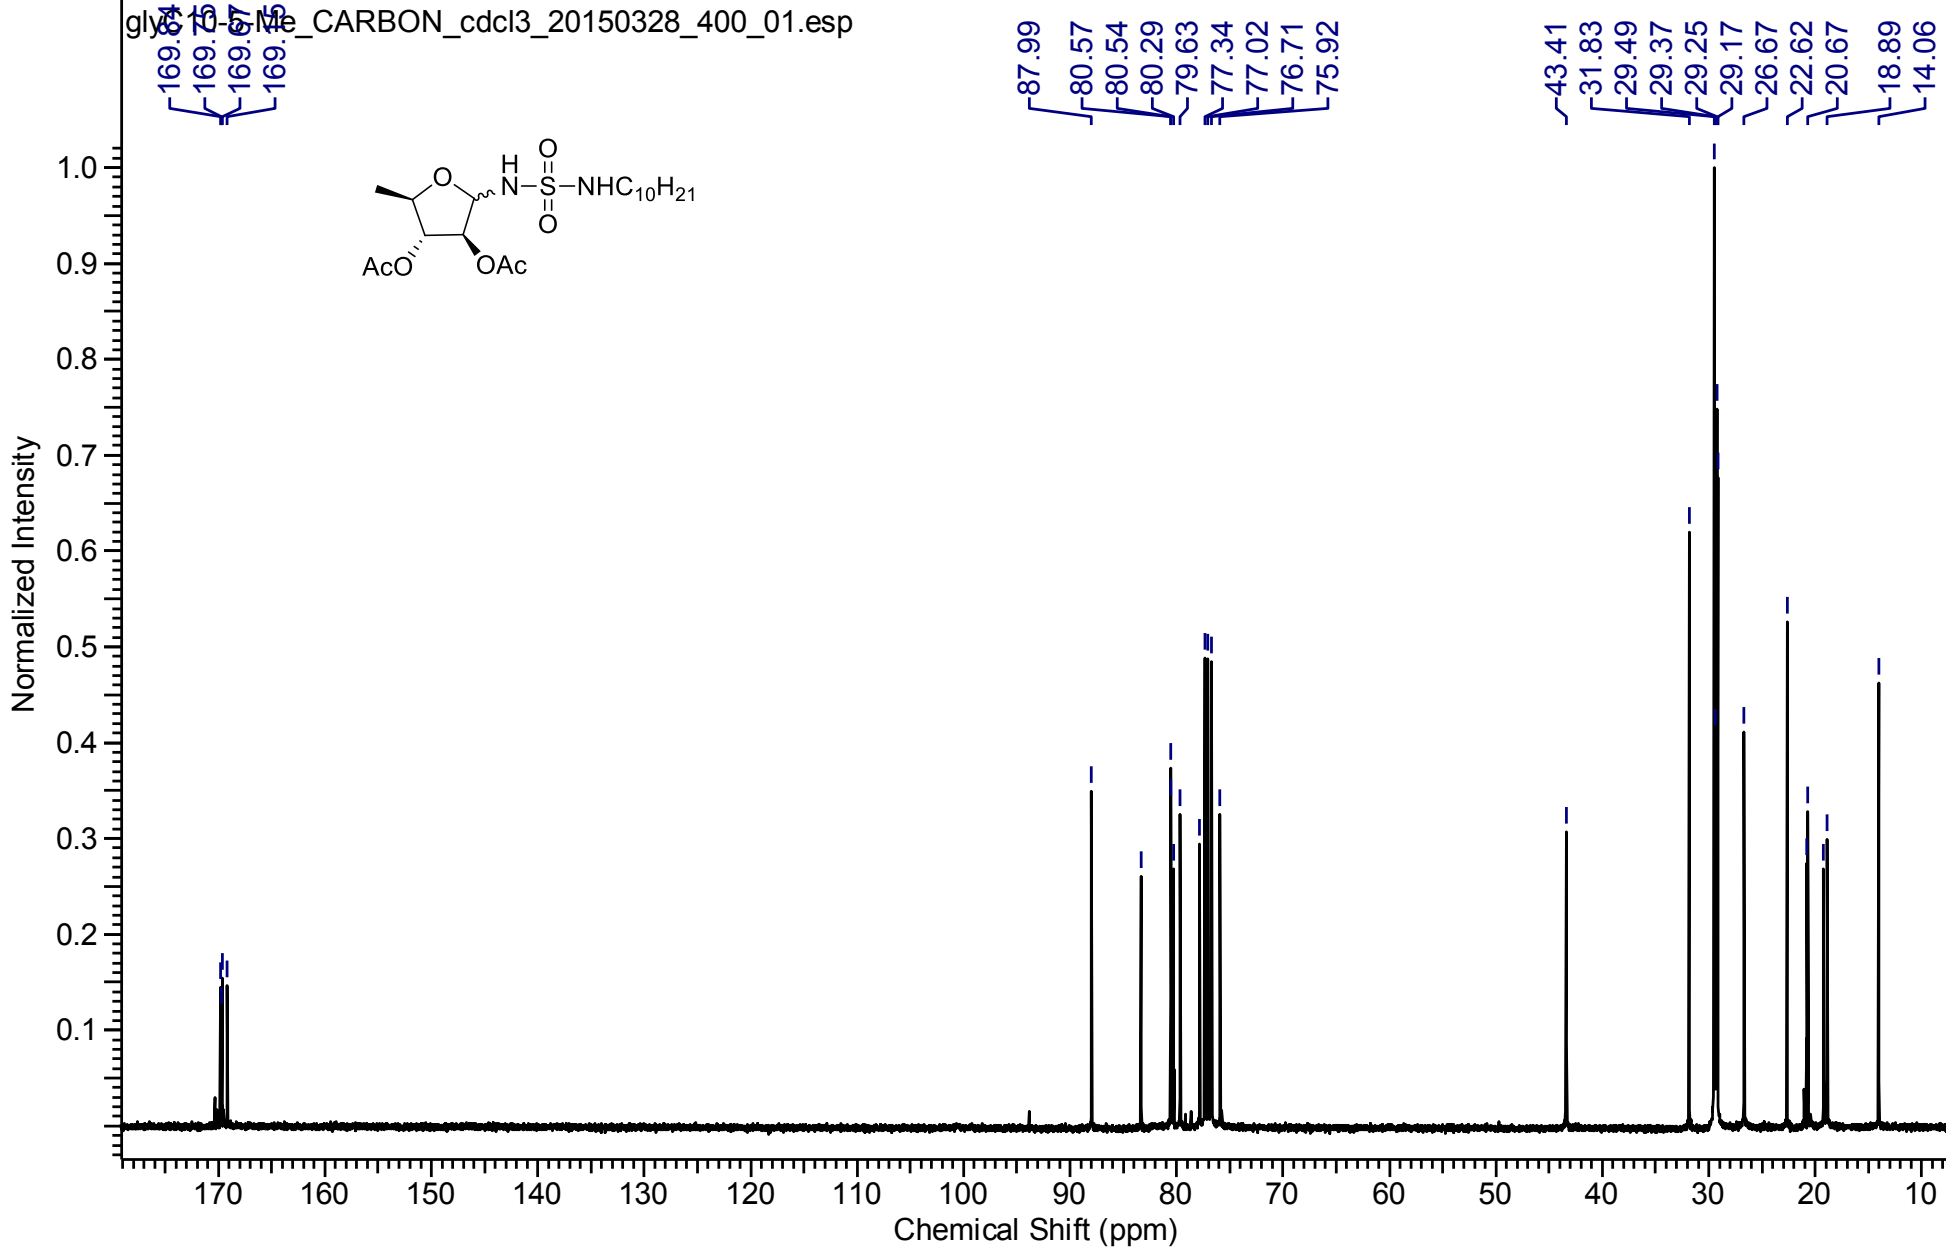

***N*-(Decyl)-*N'*-(2,3-di-*O*-acetyl-5-azido- $\alpha,\beta$ -D-arabinofuranosyl)sulfamide 4c**

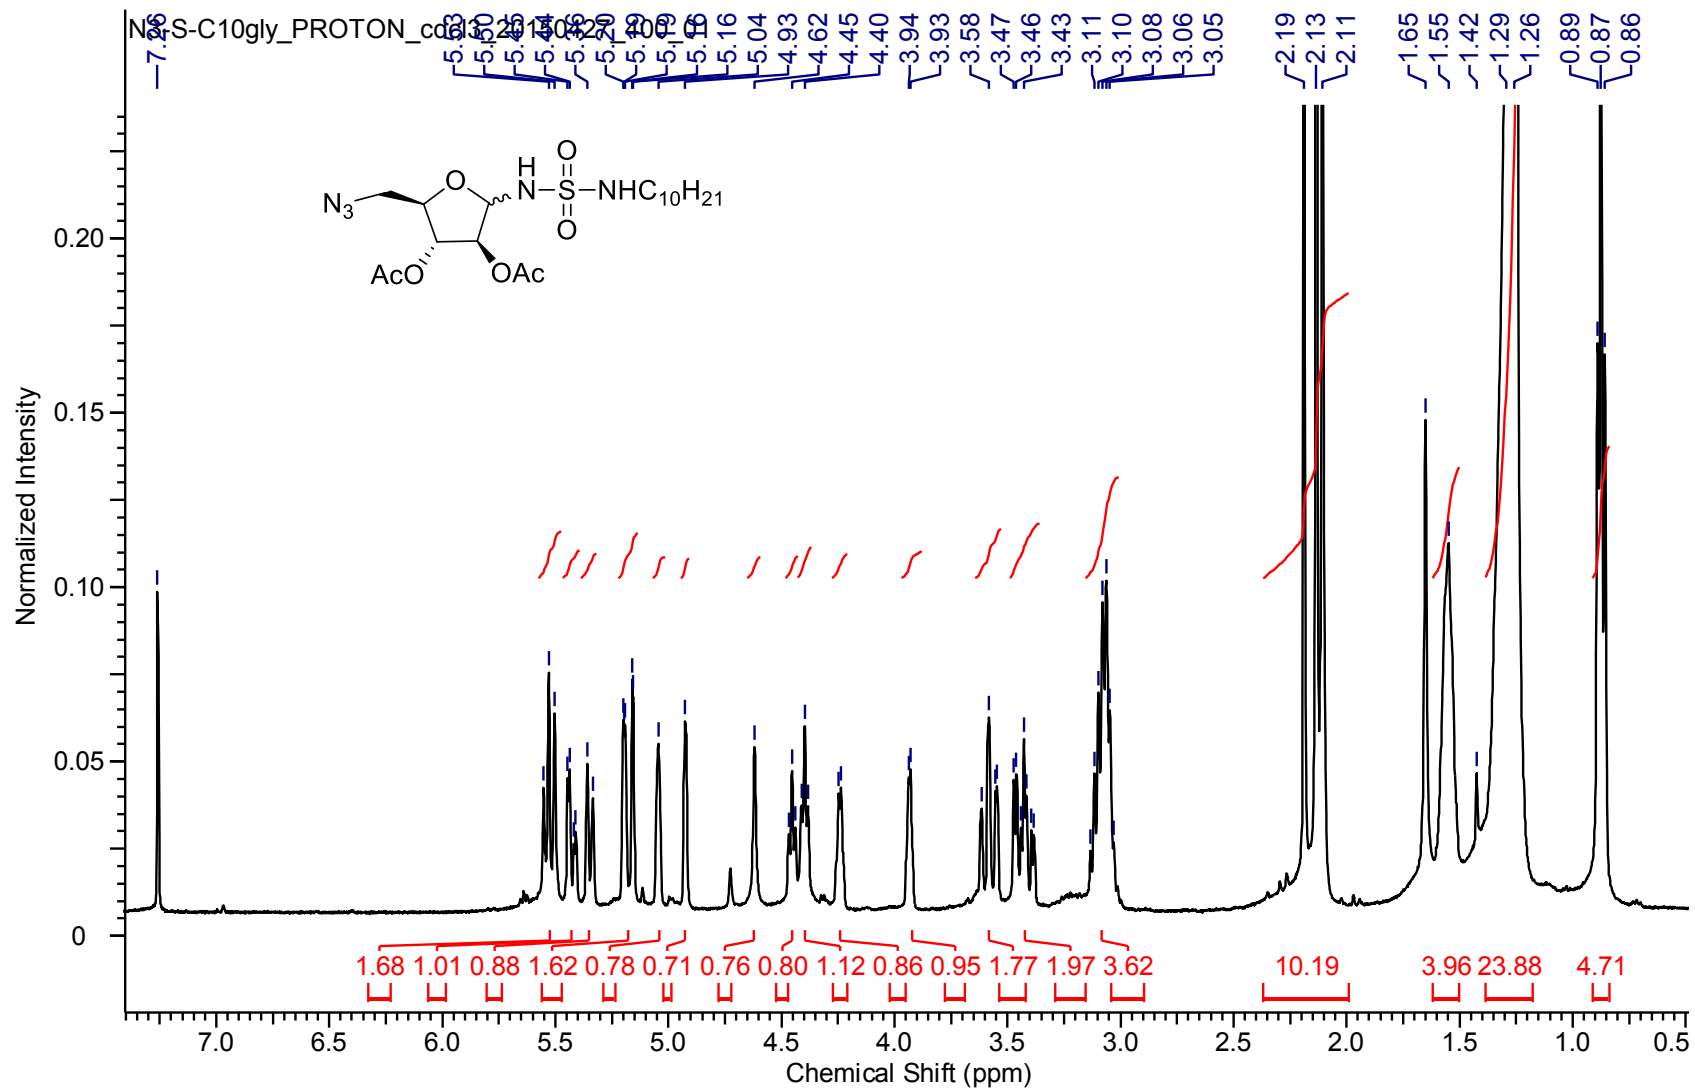

N3-S-C10gly\_CARBO<sub>N</sub>\_cdcl<sub>3</sub>\_20150428\_400\_01

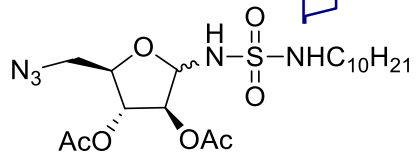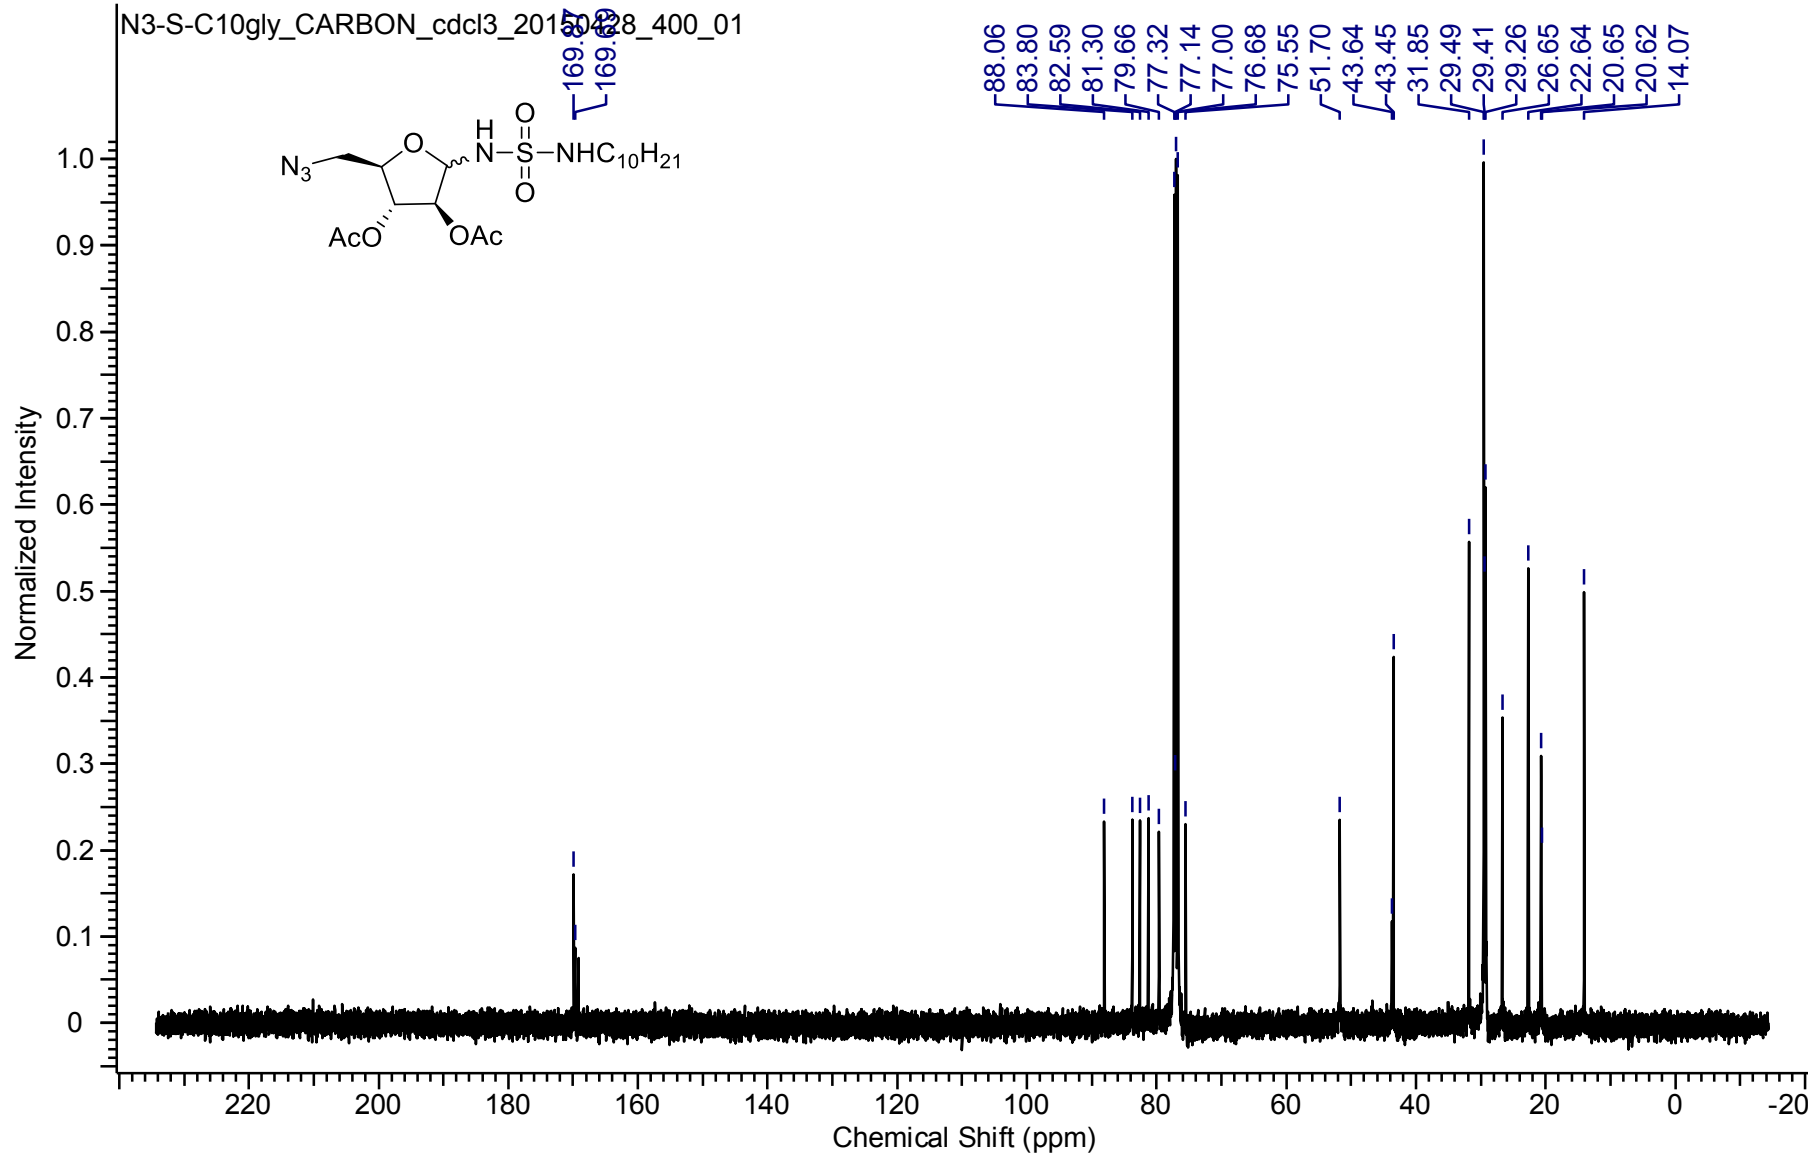

*N*-(Octyl)-*N'*-(2,3-di-*O*-acetyl-5-fluoro- $\alpha,\beta$ -D-arabinofuranosyl)sulfamide 7a

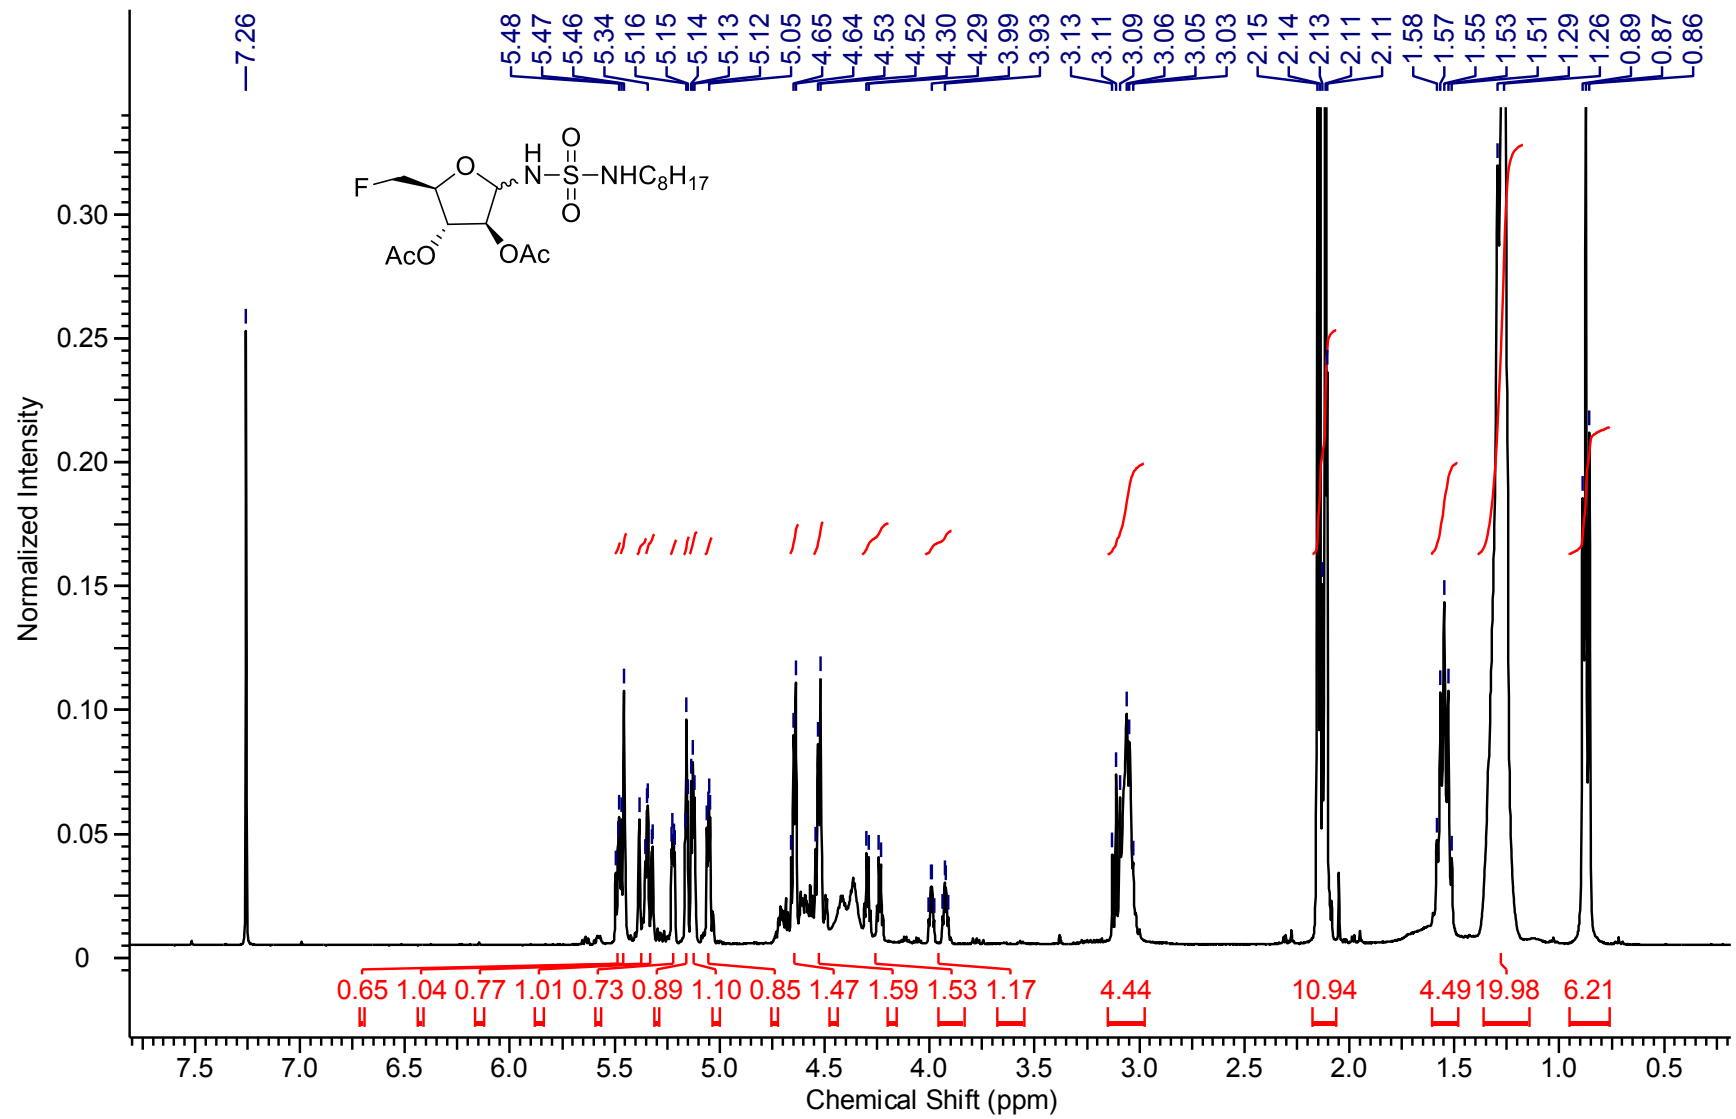

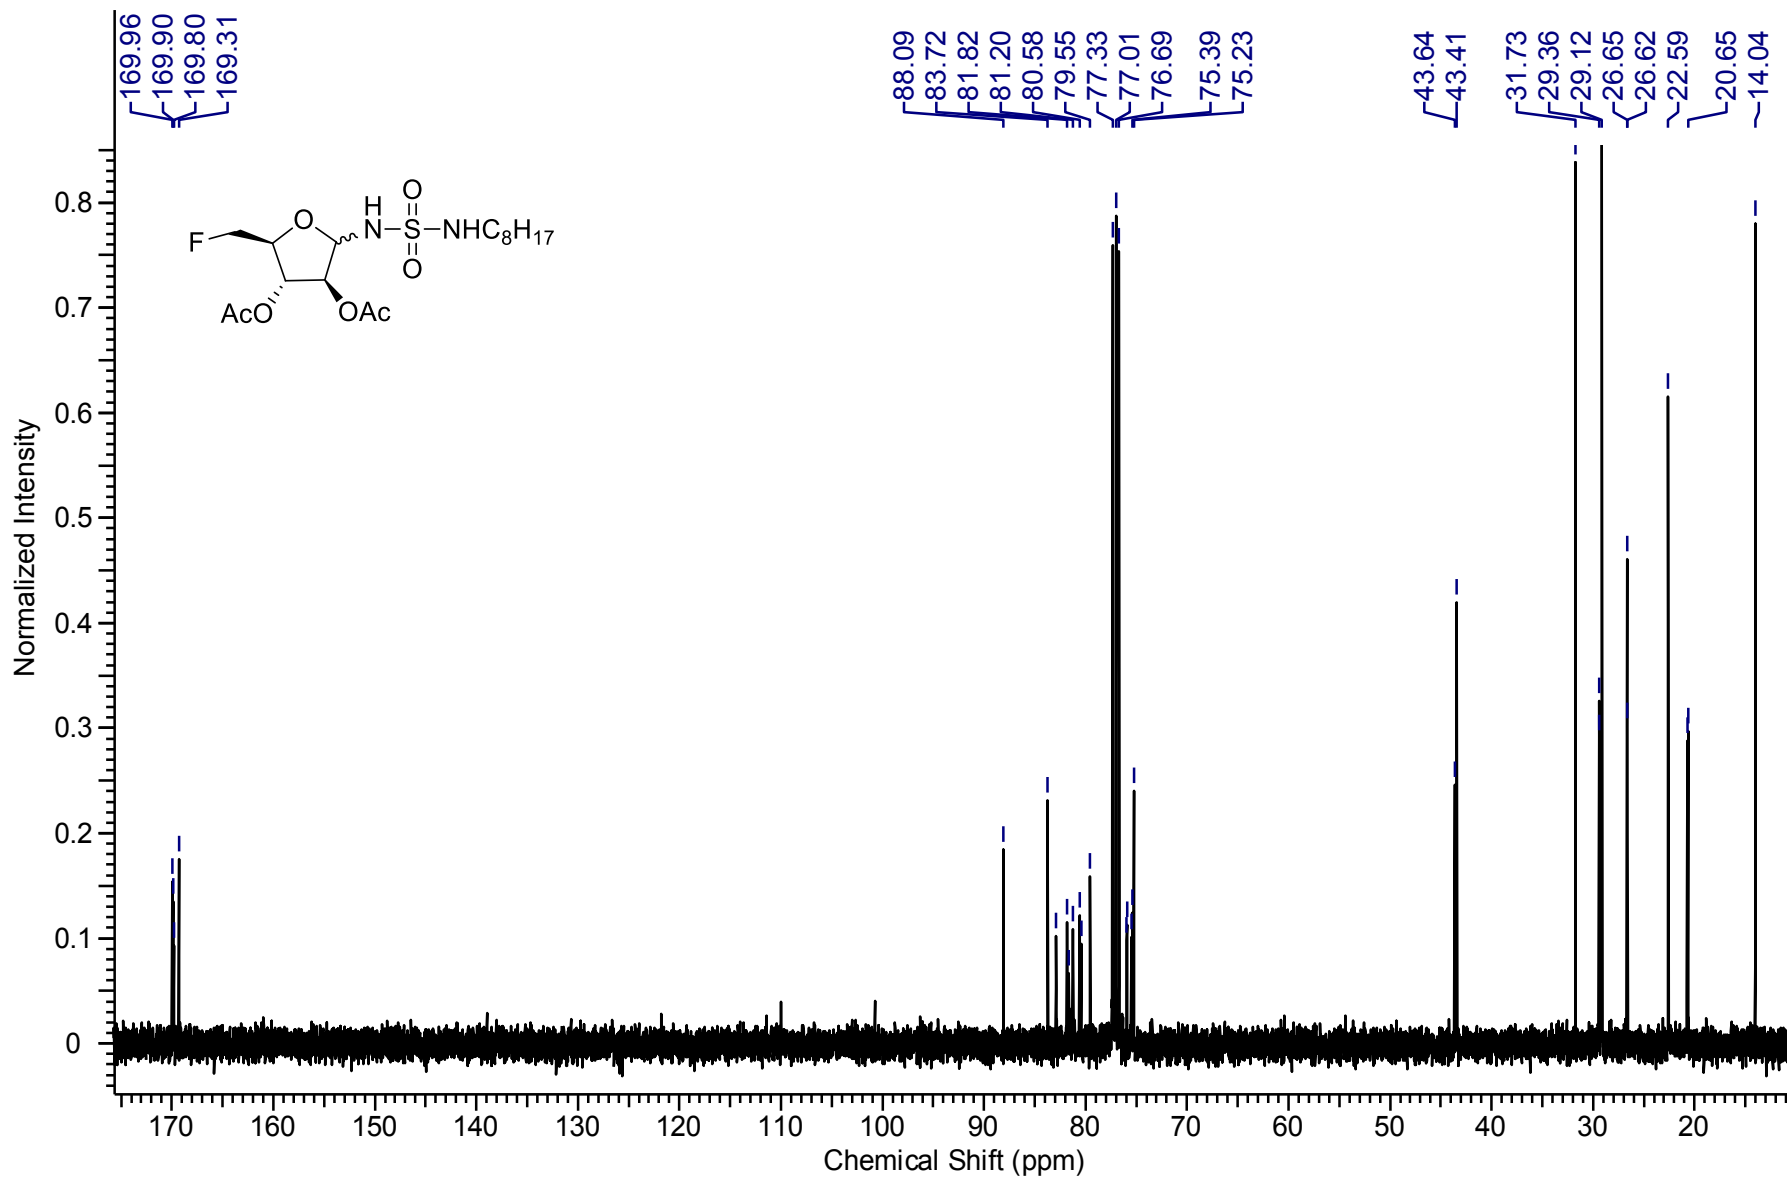



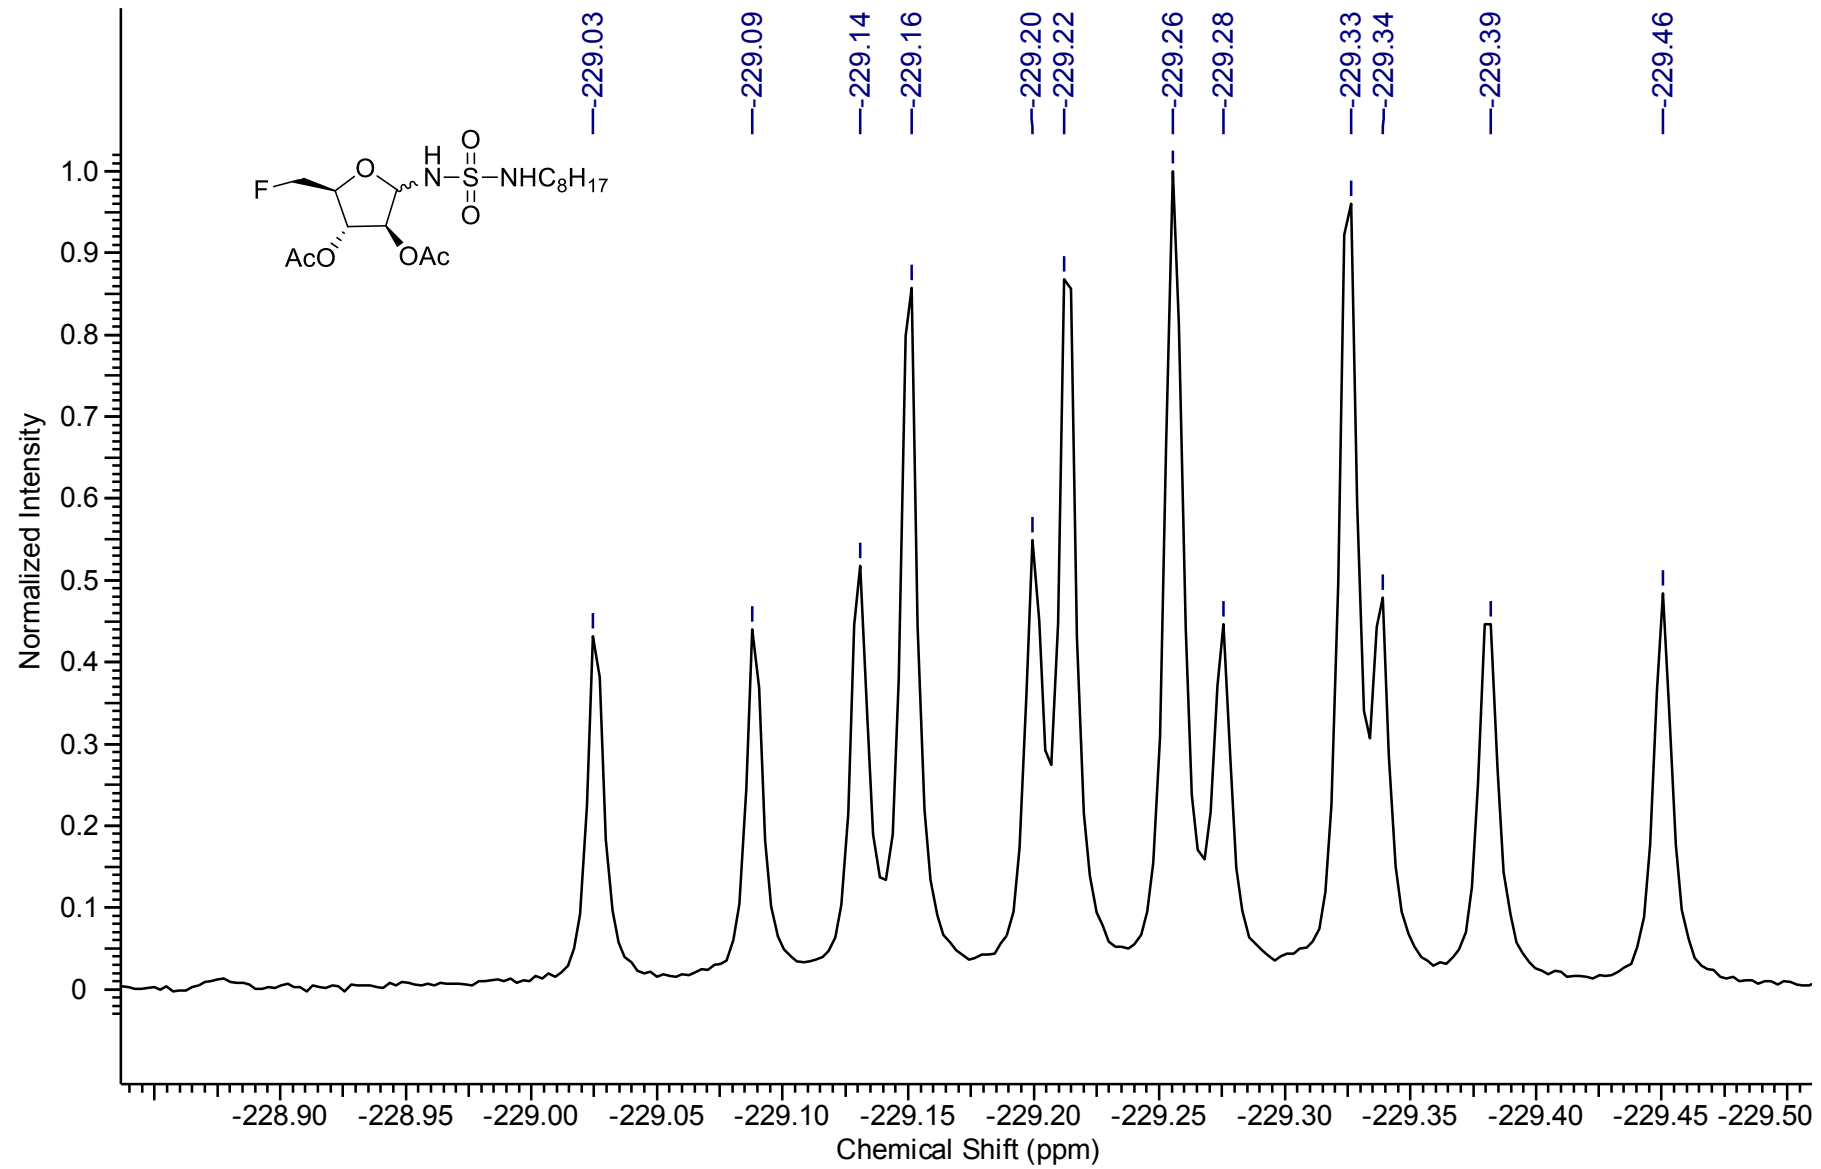

***N*-(Decyl)-*N'*-(2,3-di-*O*-acetyl-5-fluoro- $\alpha,\beta$ -D-arabinofuranosyl)sulfamide 7b**

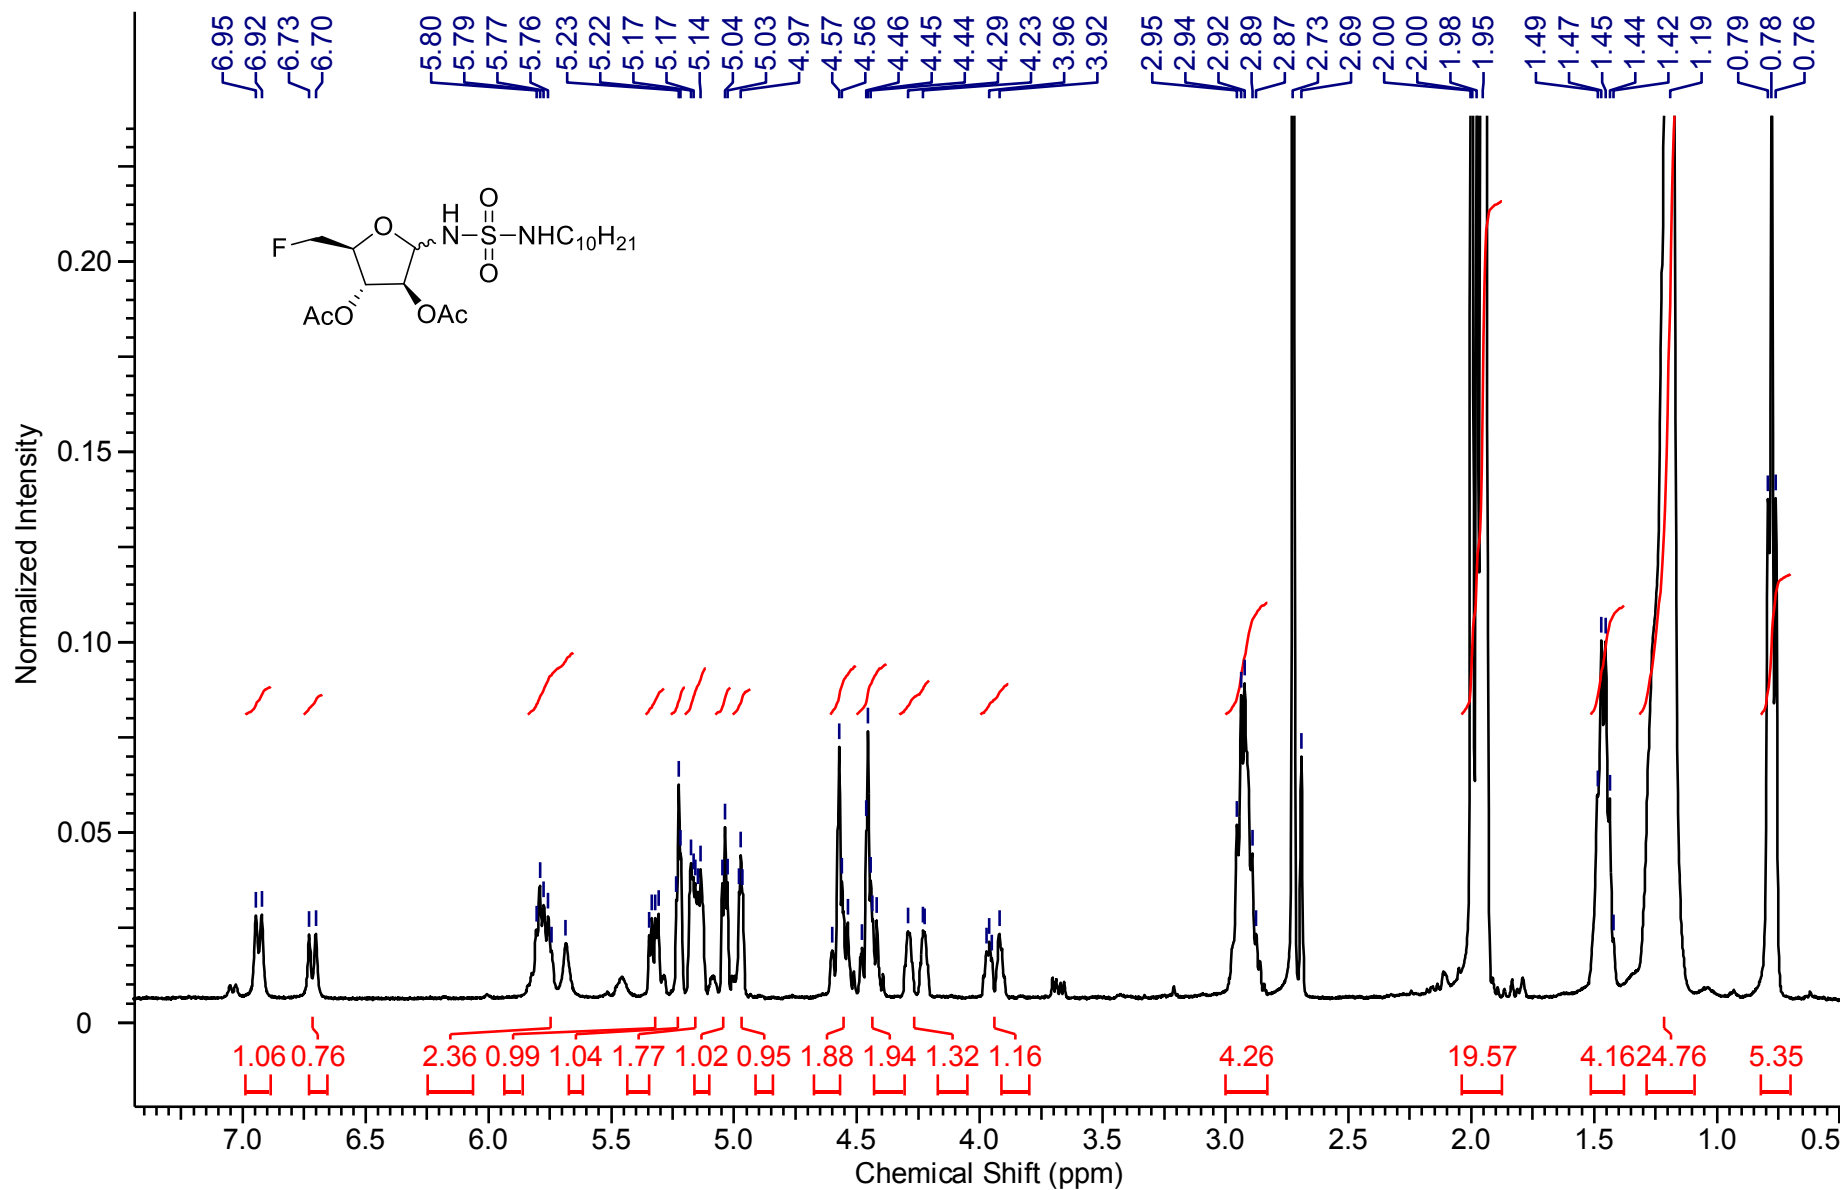

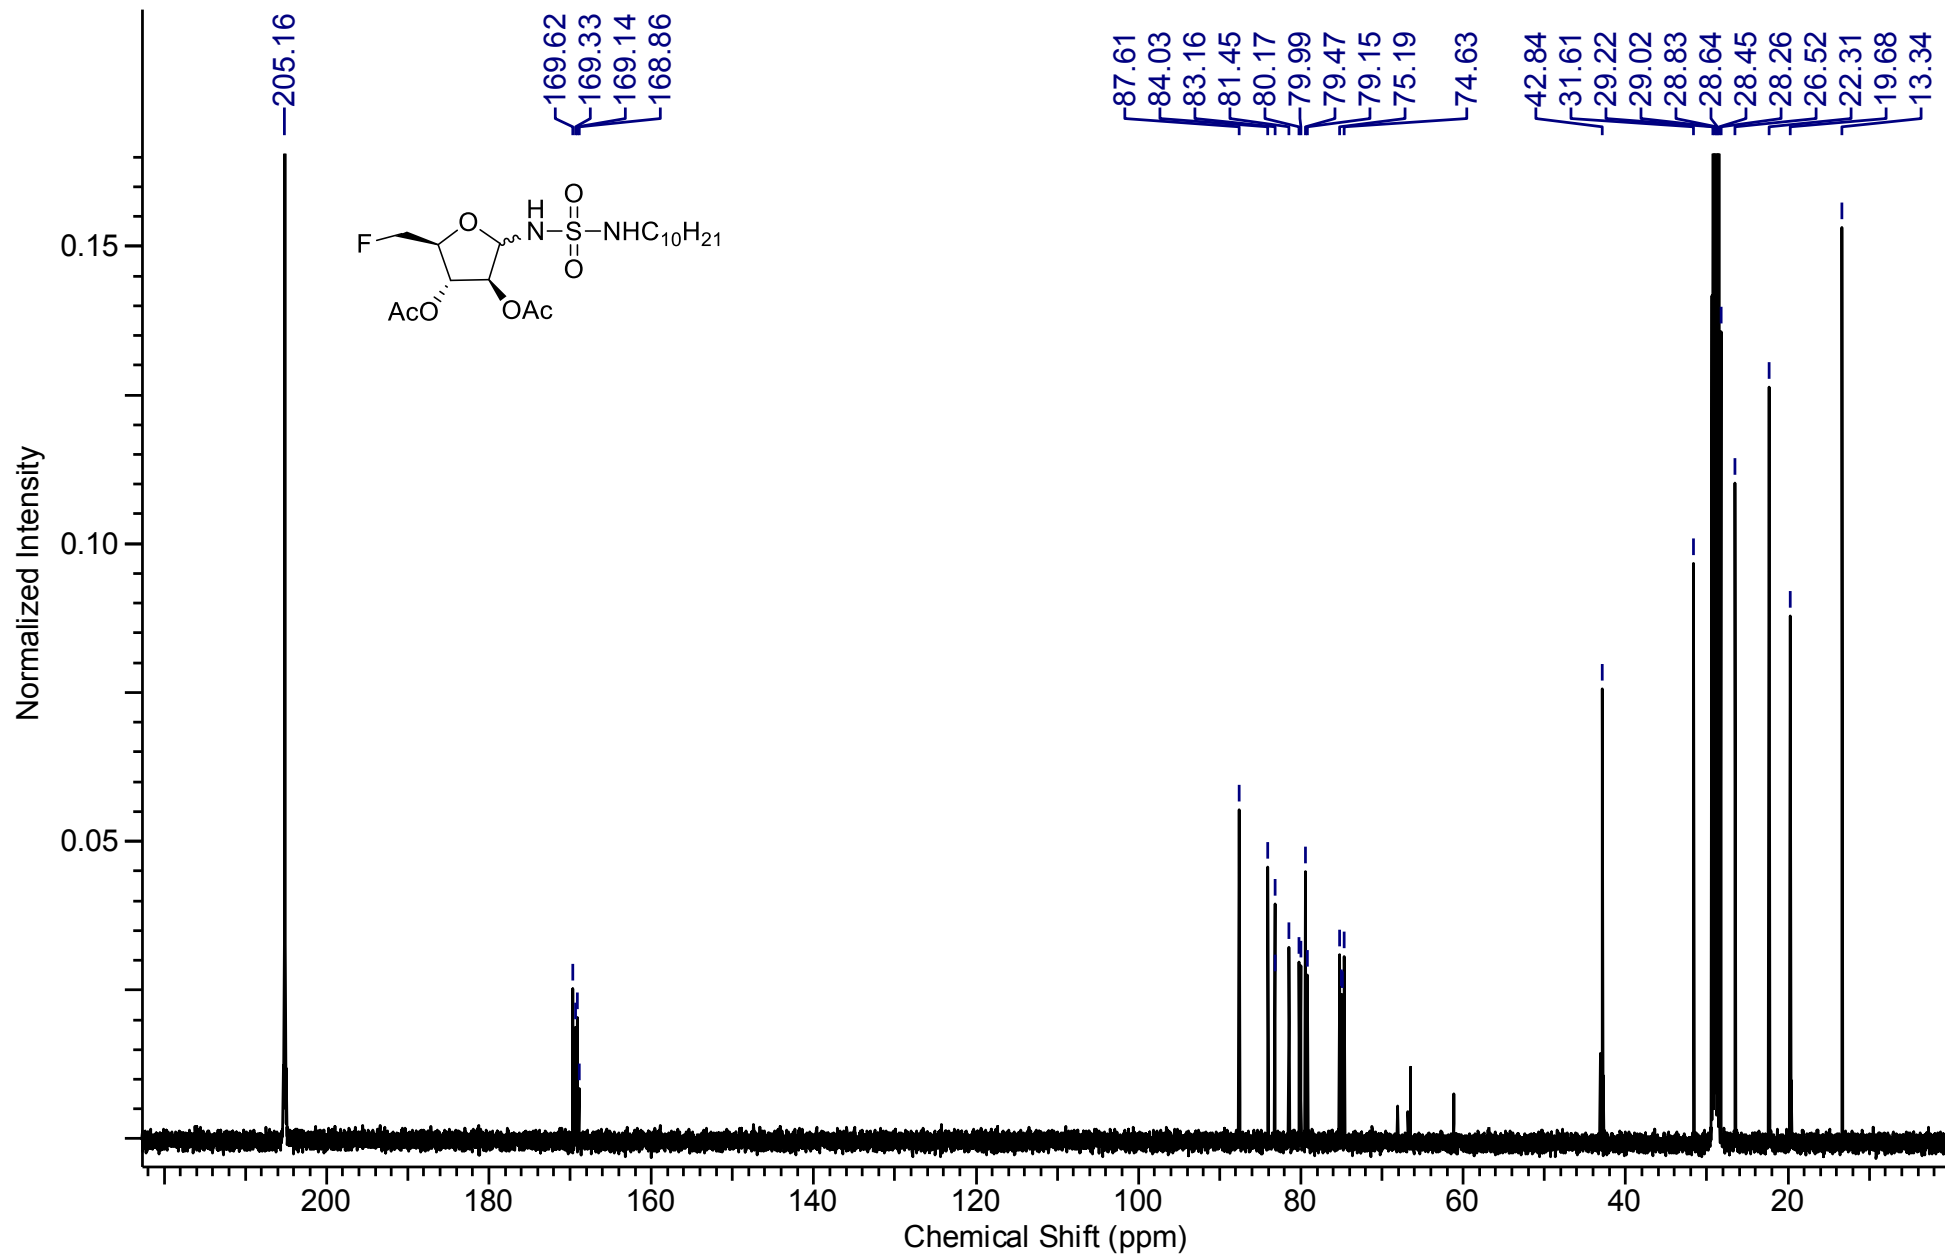

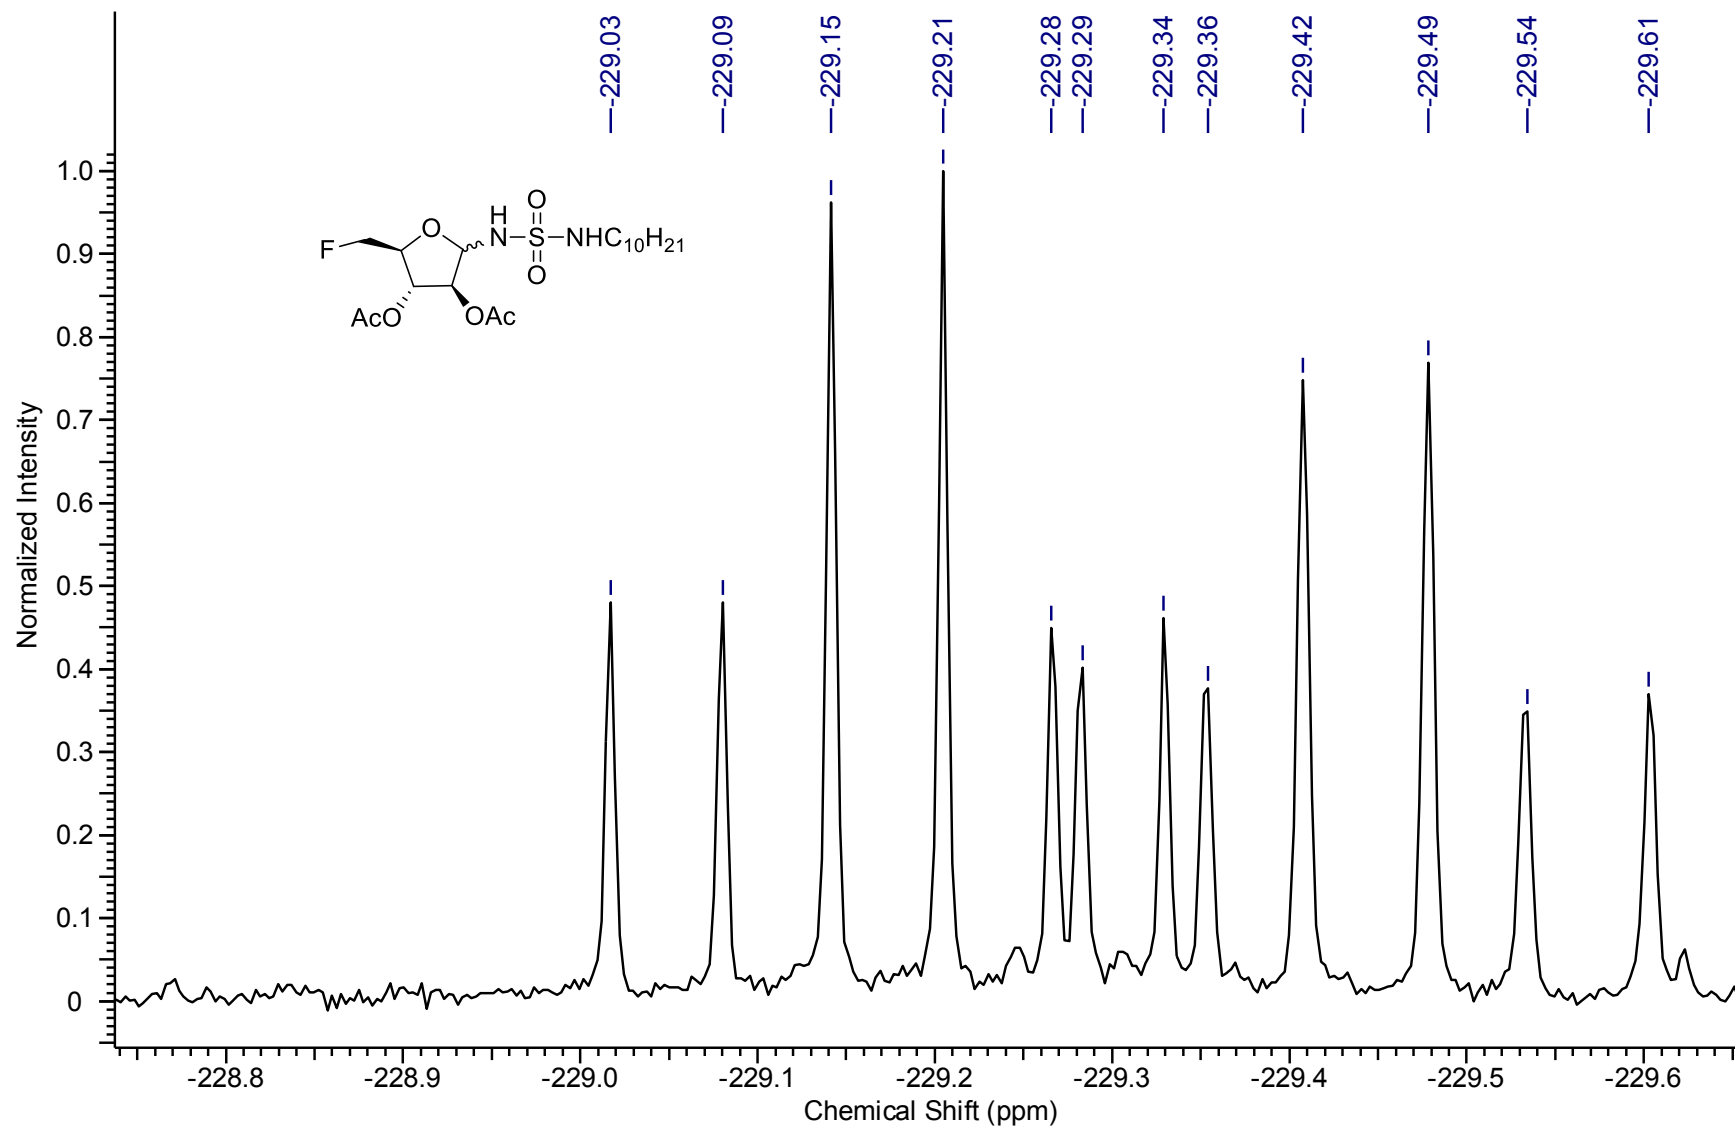

***N*-(Dodecyl)-*N'*-(2,3-di-*O*-acetyl-5-fluoro- $\alpha,\beta$ -D-arabinofuranosyl)sulfamide **7c****

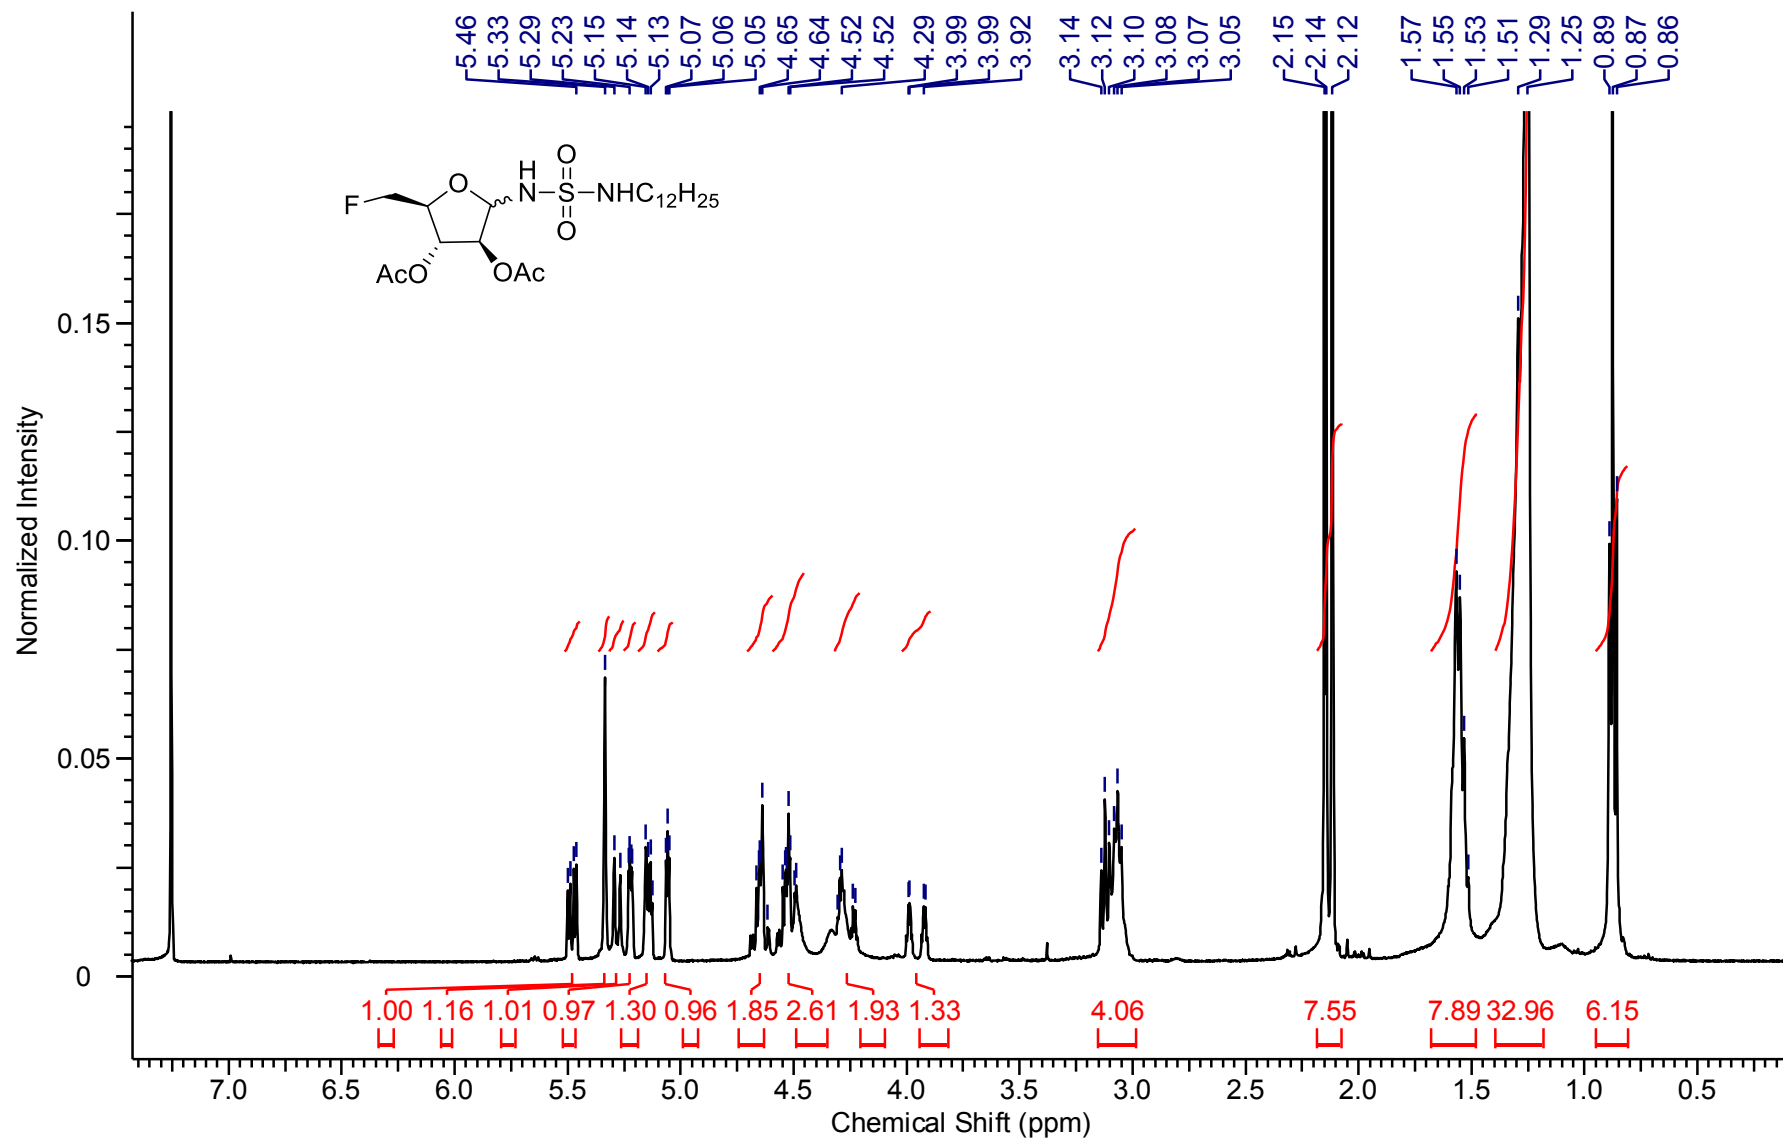

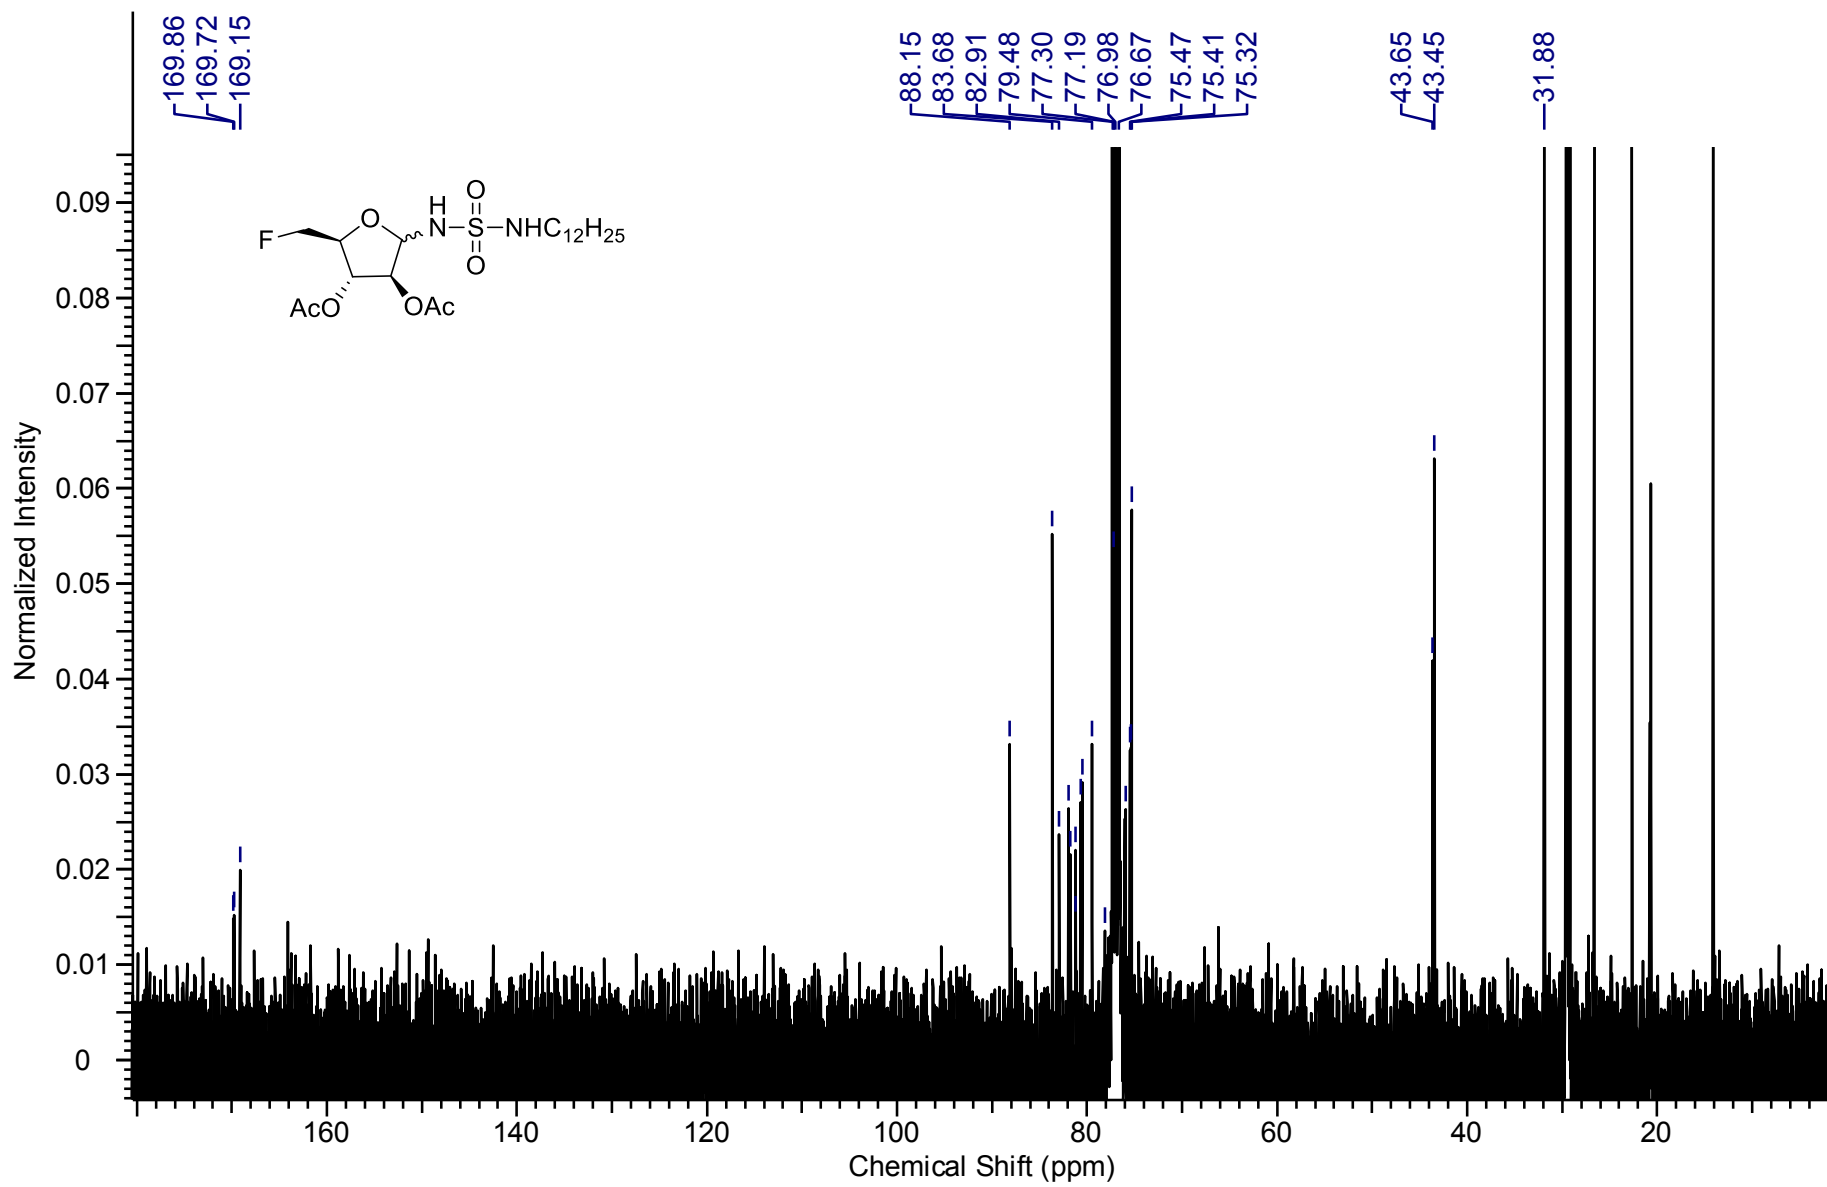

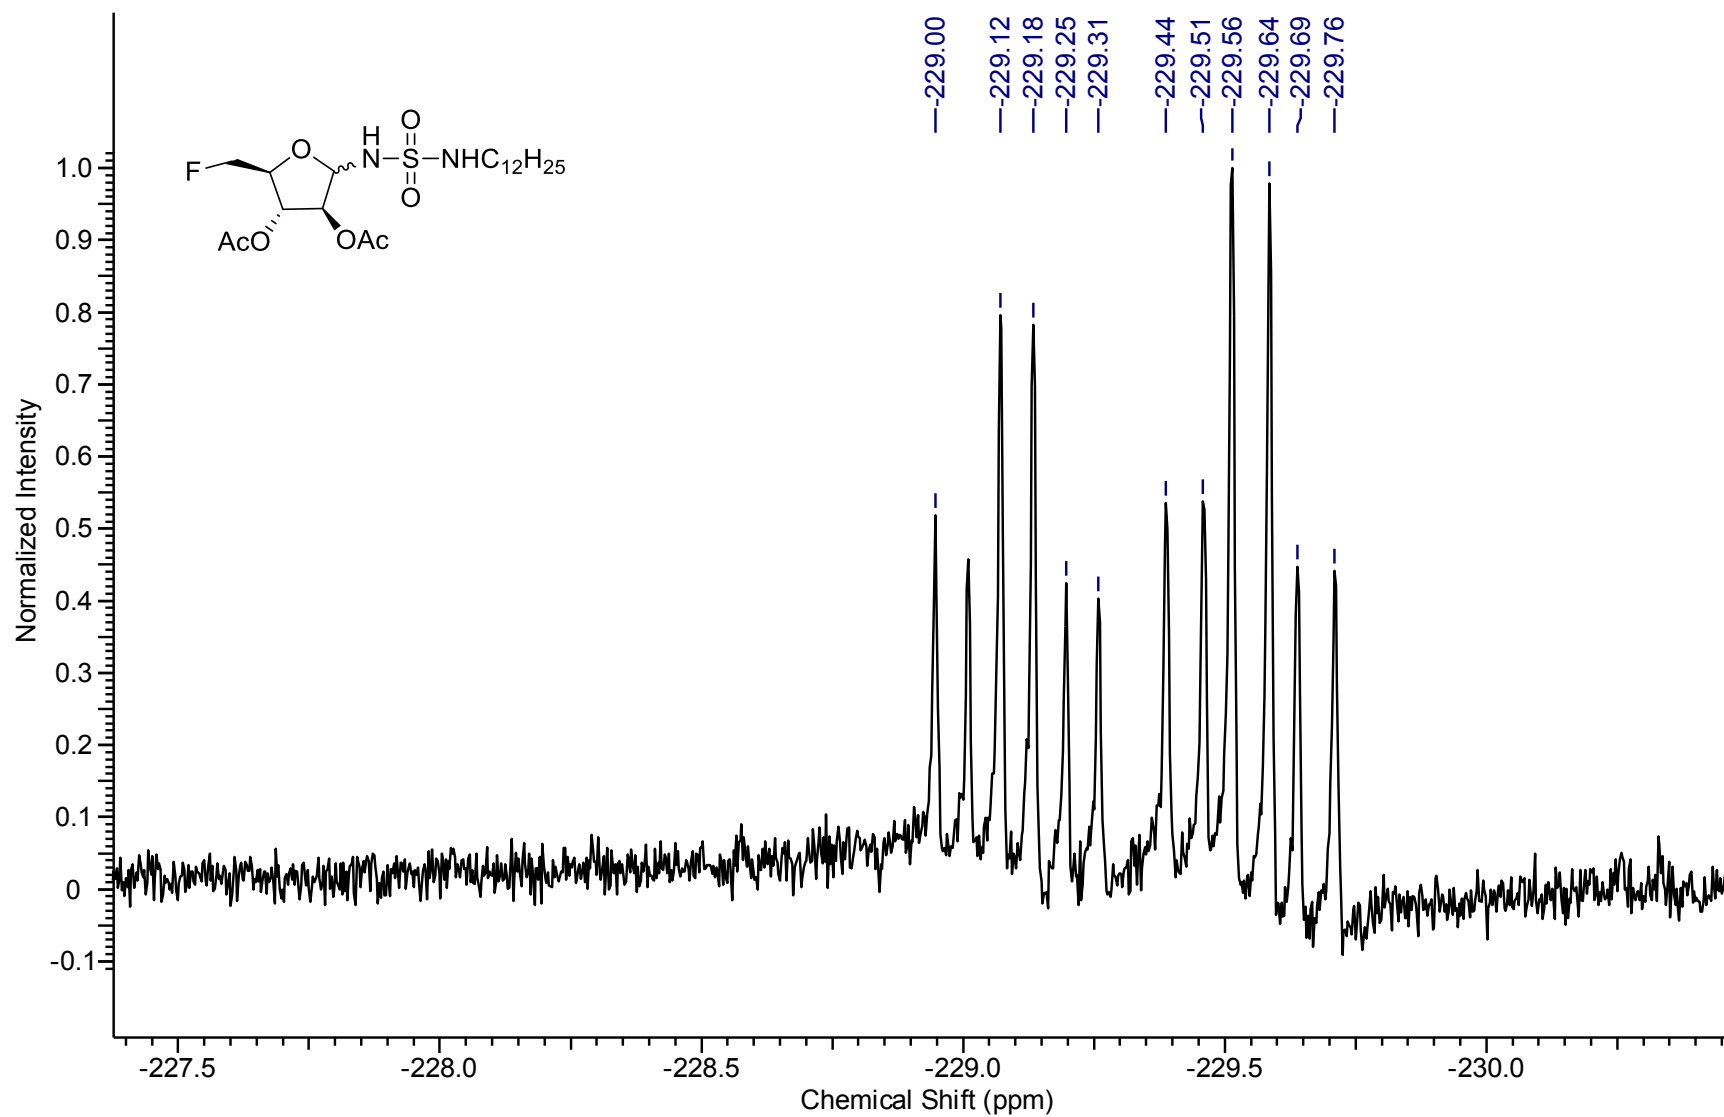

***N*-(Decyl)-*N'*-(5-*O*-methyl- $\alpha,\beta$ -D-arabinofuranosyl)sulfamide 5a**

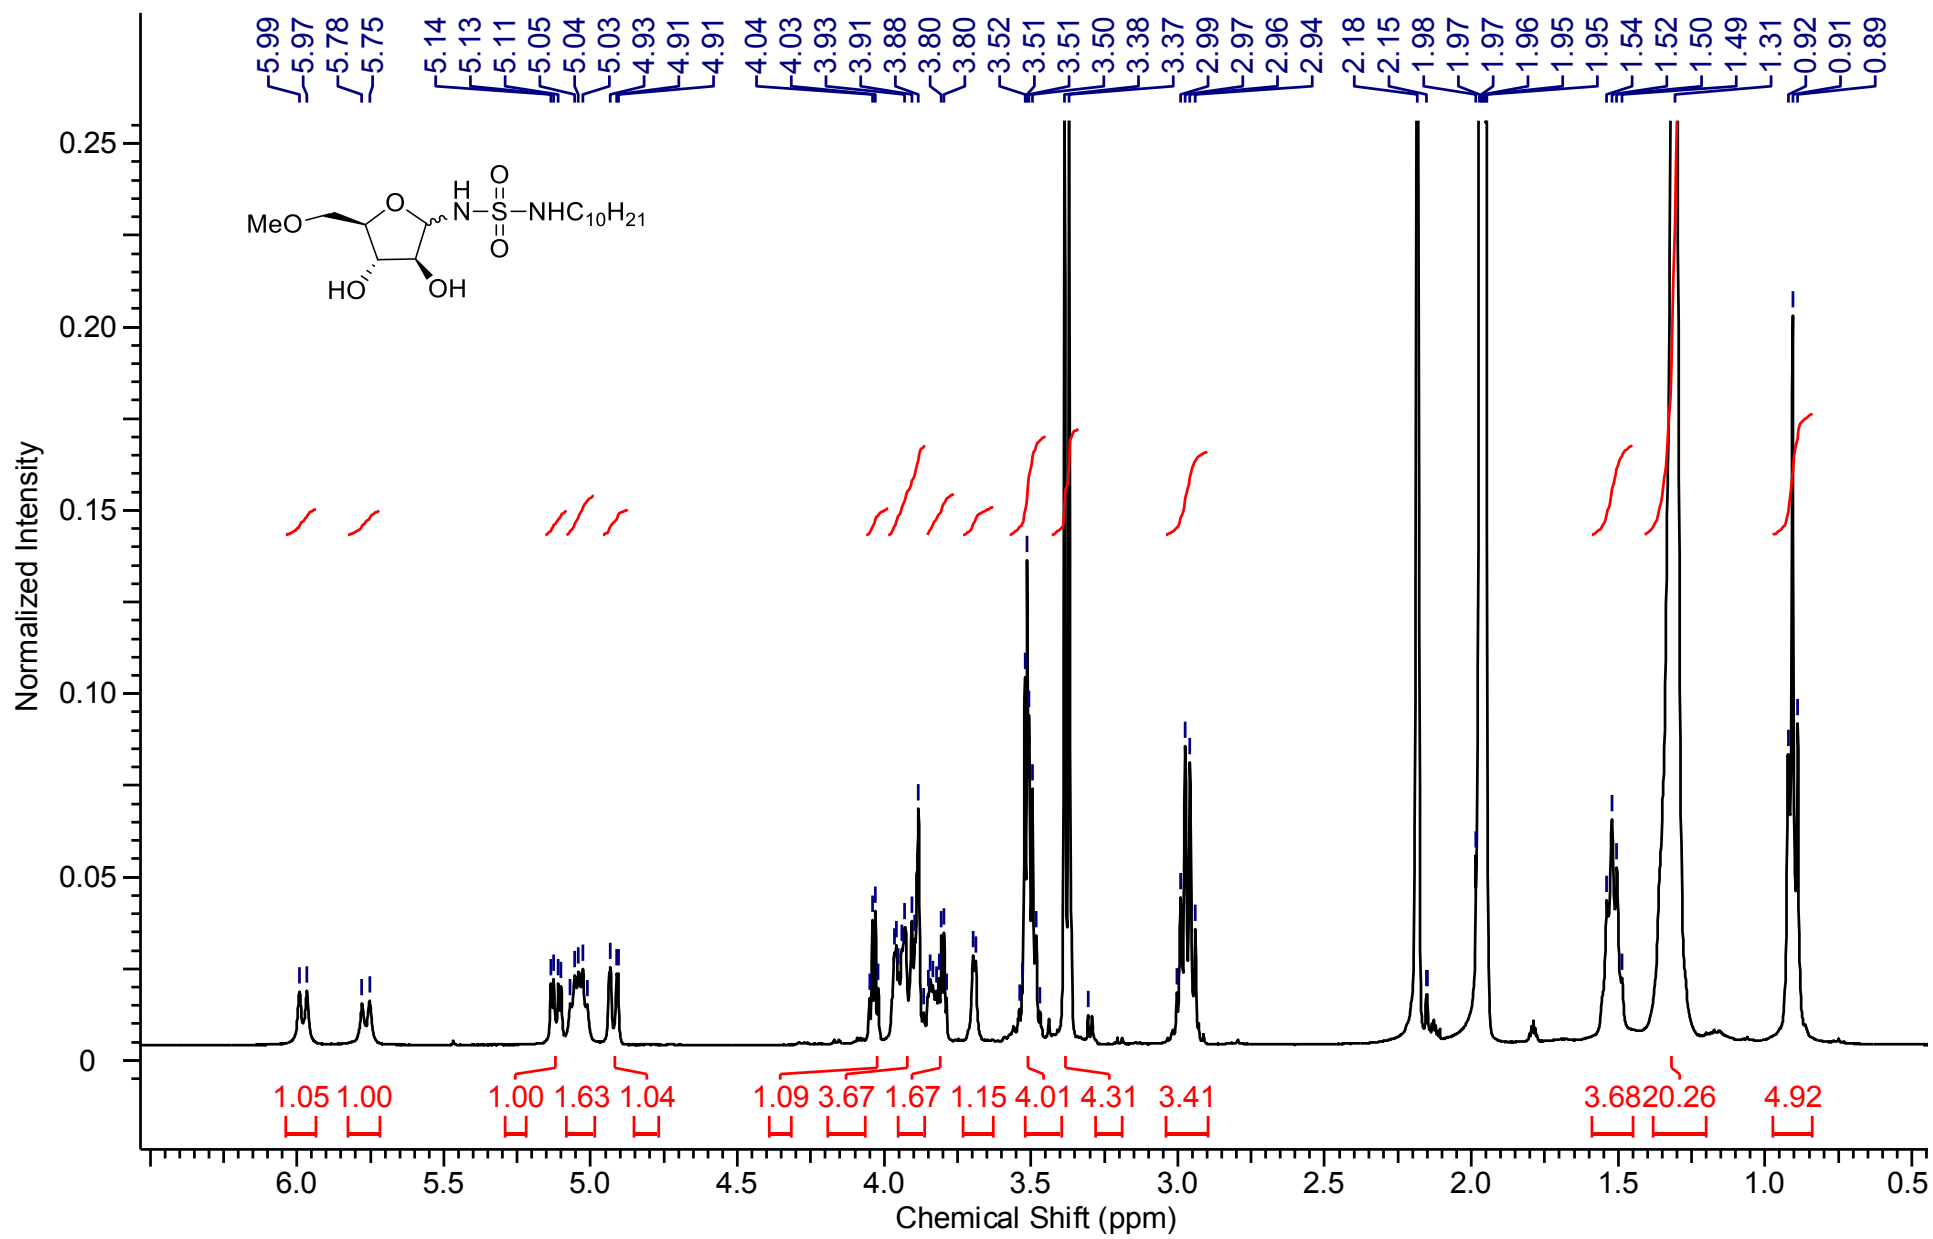



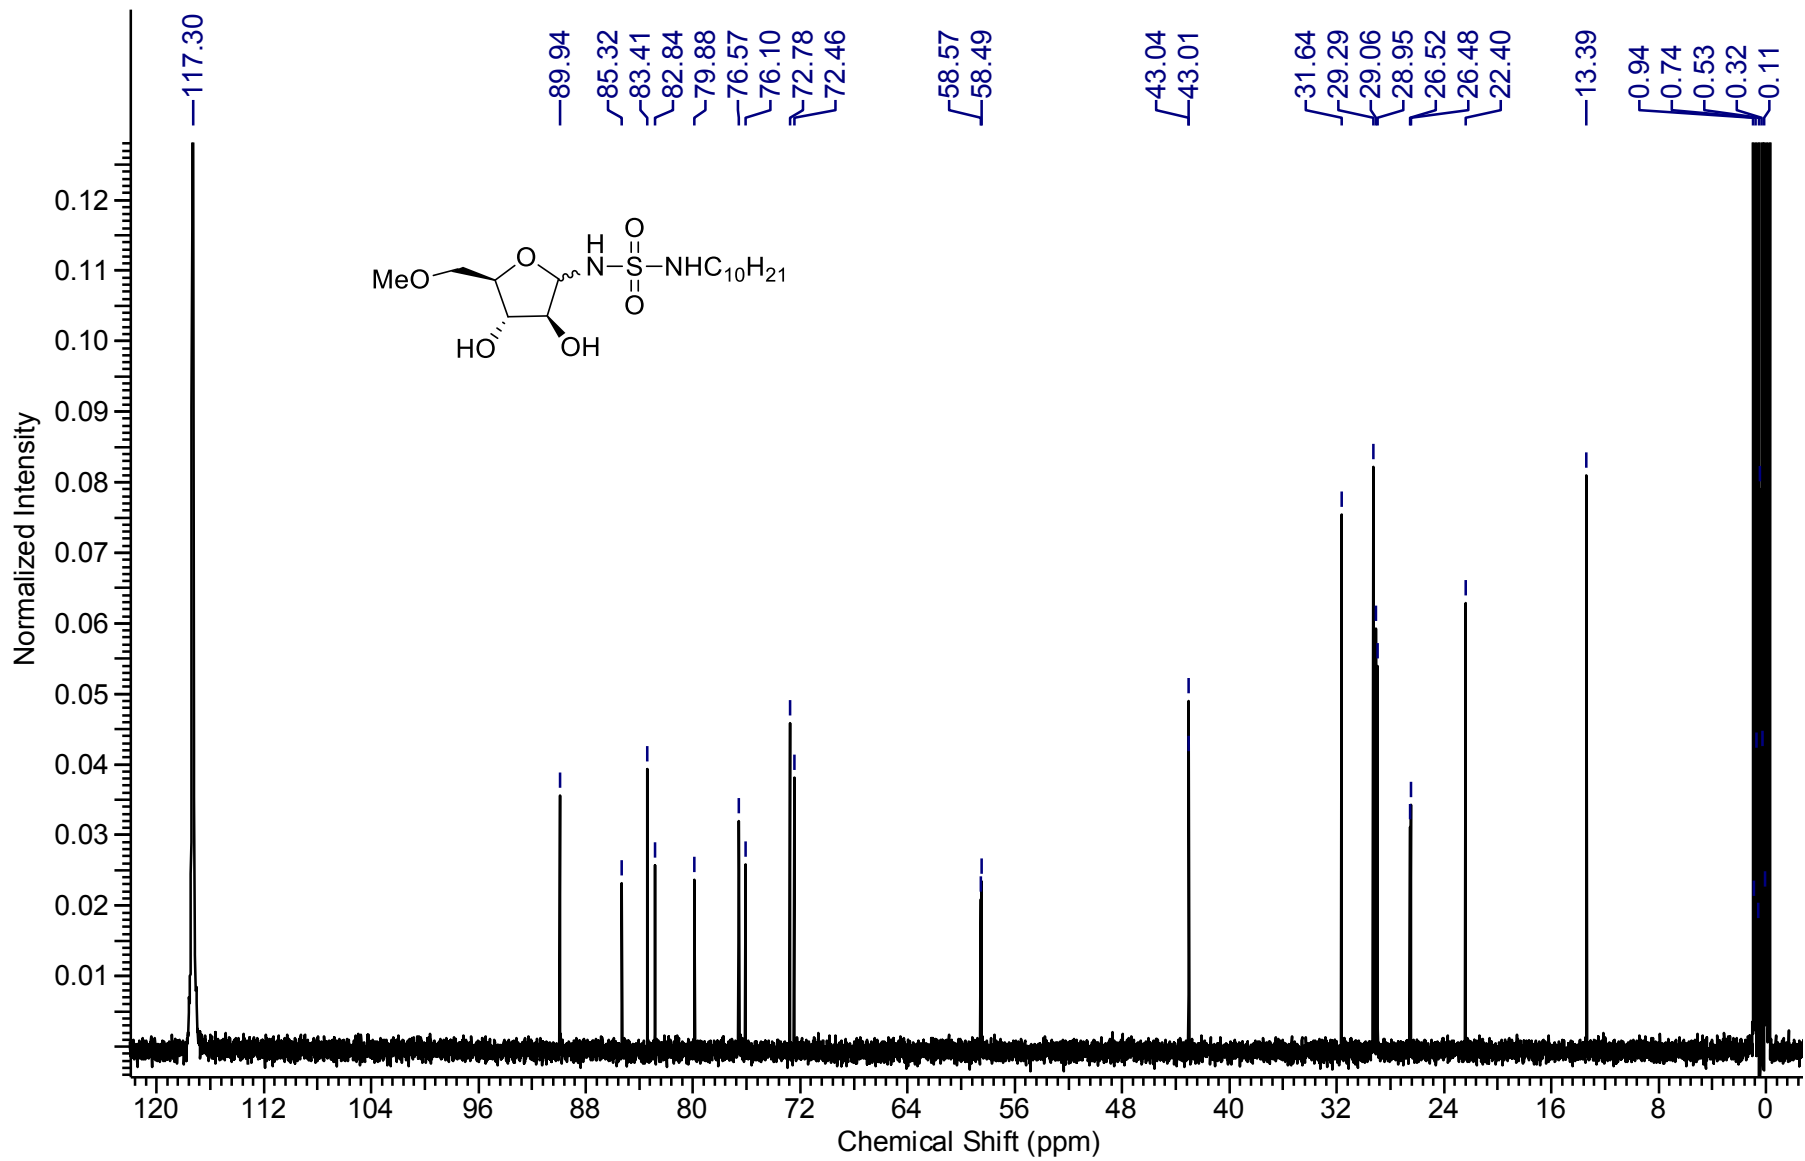

***N*-(Decyl)-*N'*-(5-deoxy- $\alpha,\beta$ -D-arabinofuranosyl)sulfamide 5b**

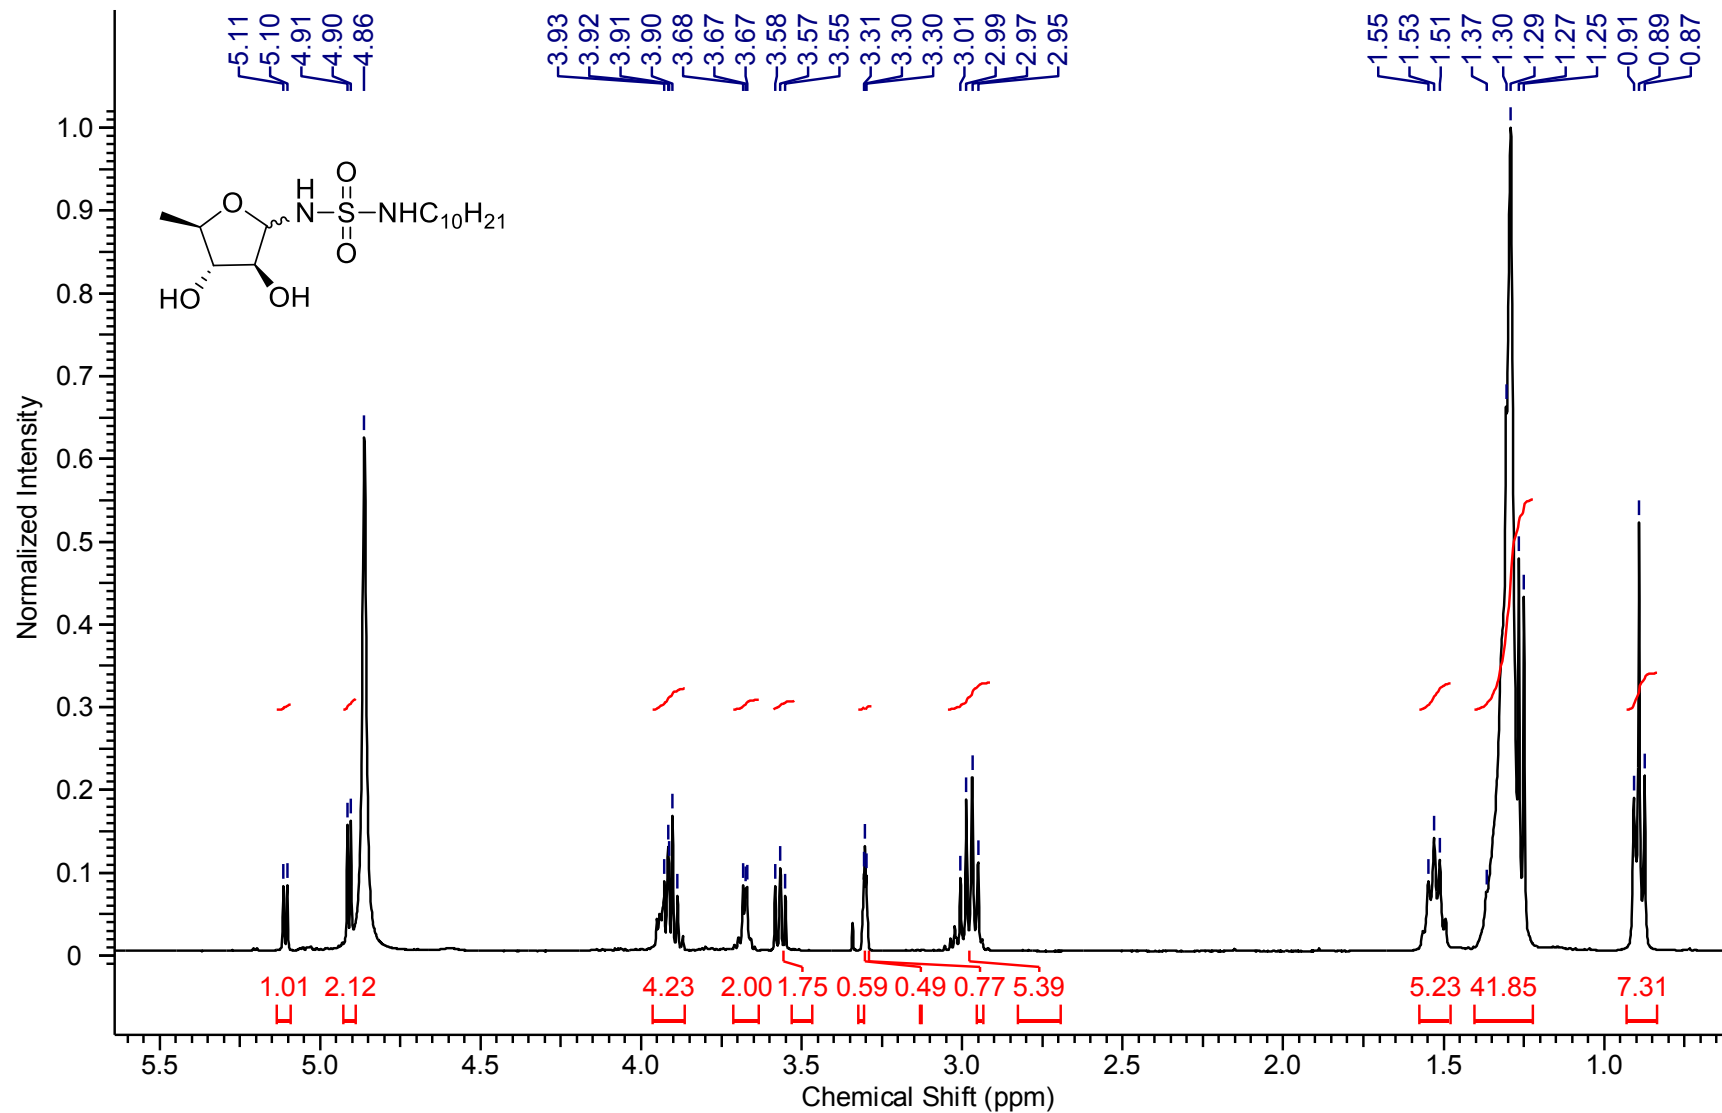

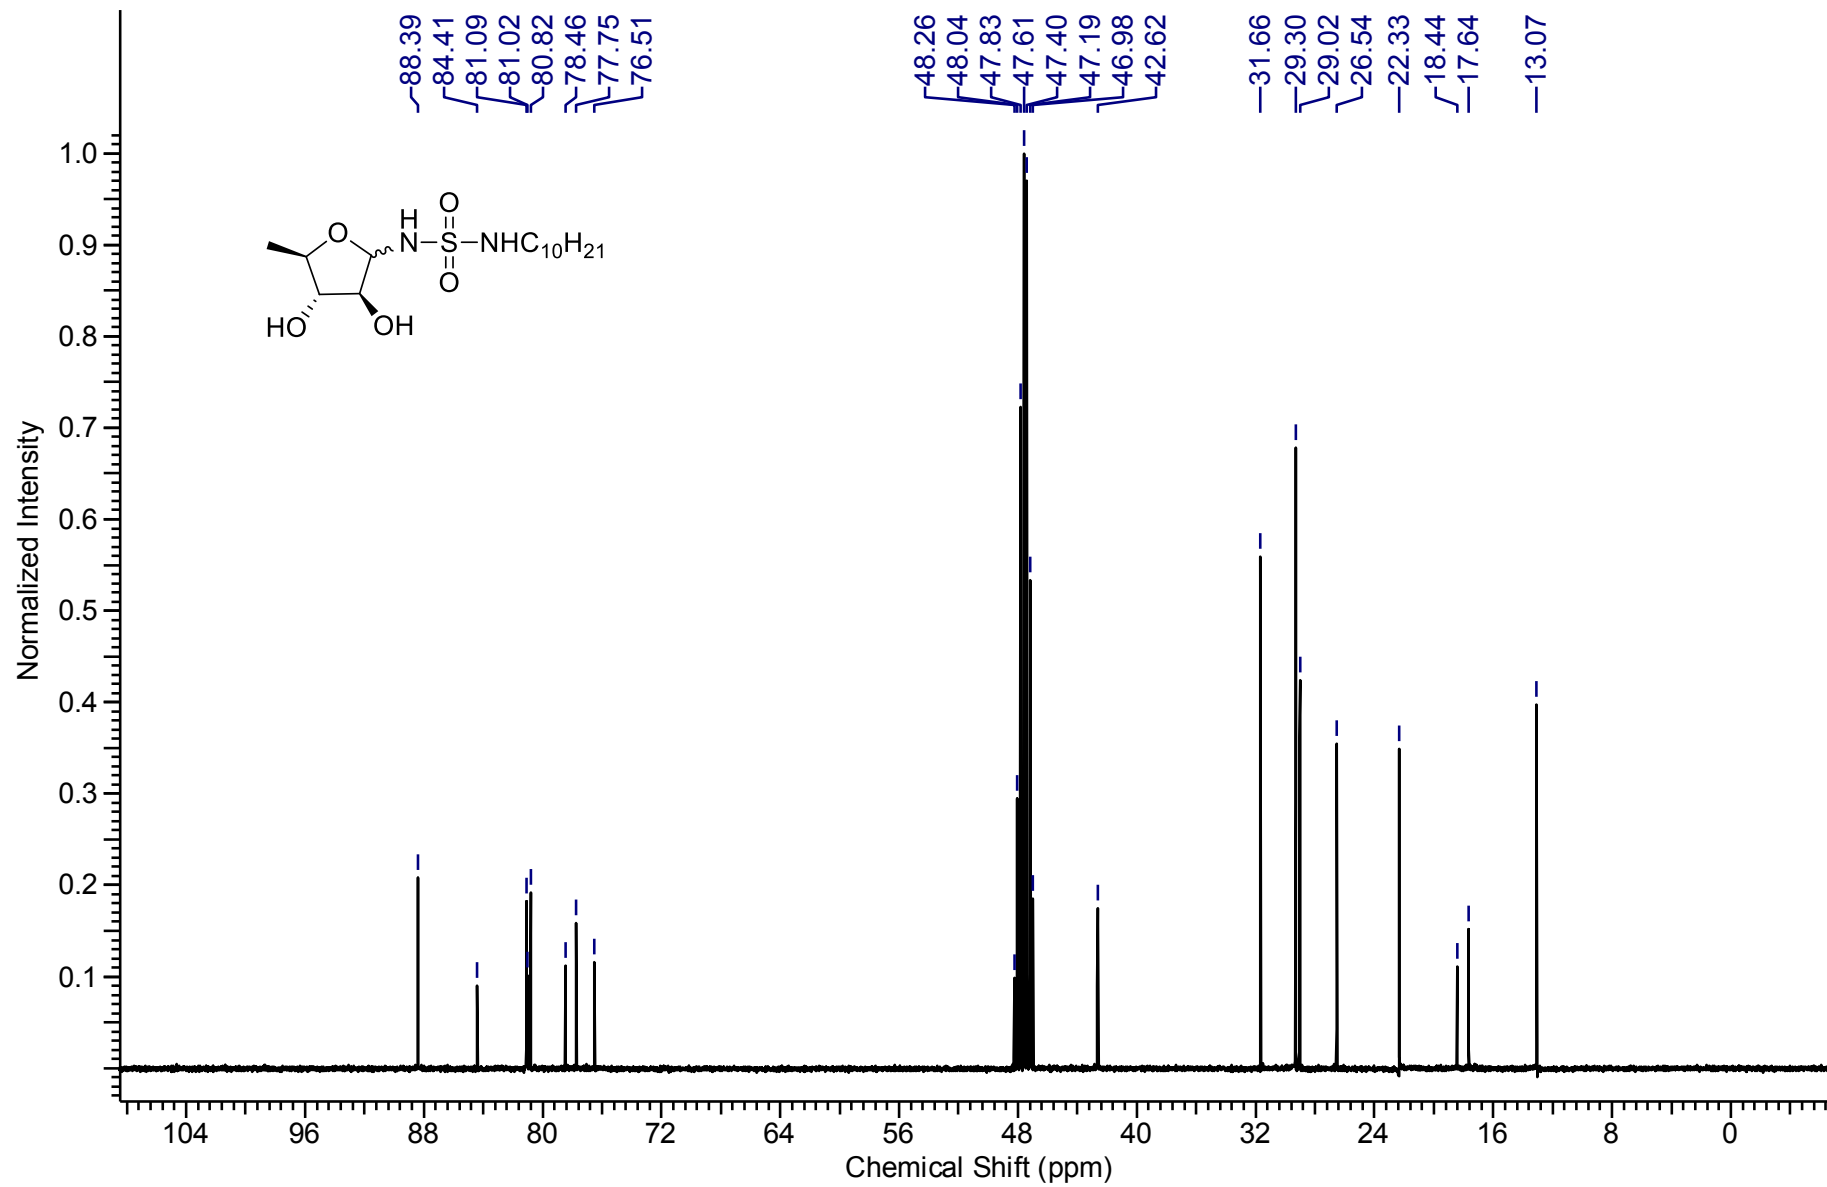

***N*-(Decyl)-*N'*-(5-azido- $\alpha,\beta$ -D-arabinofuranosyl)sulfamide 5c**

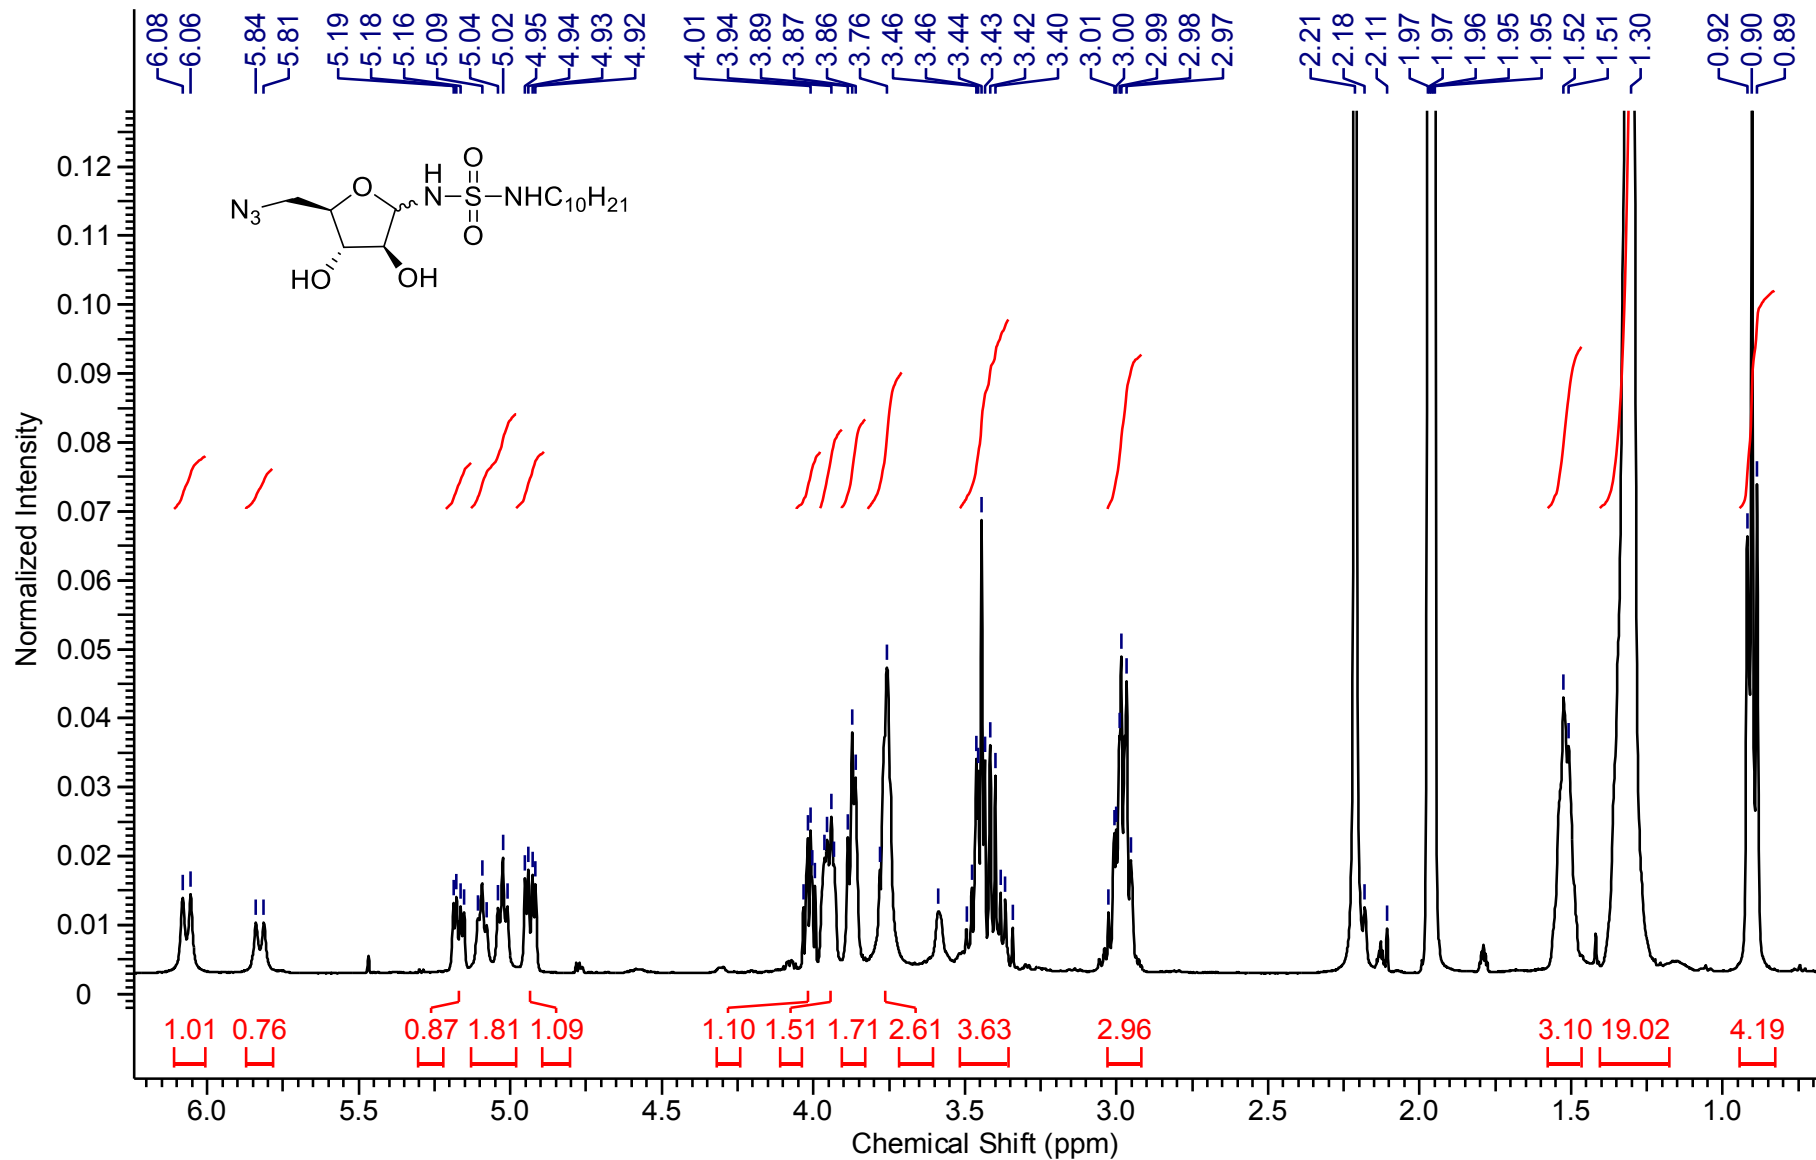

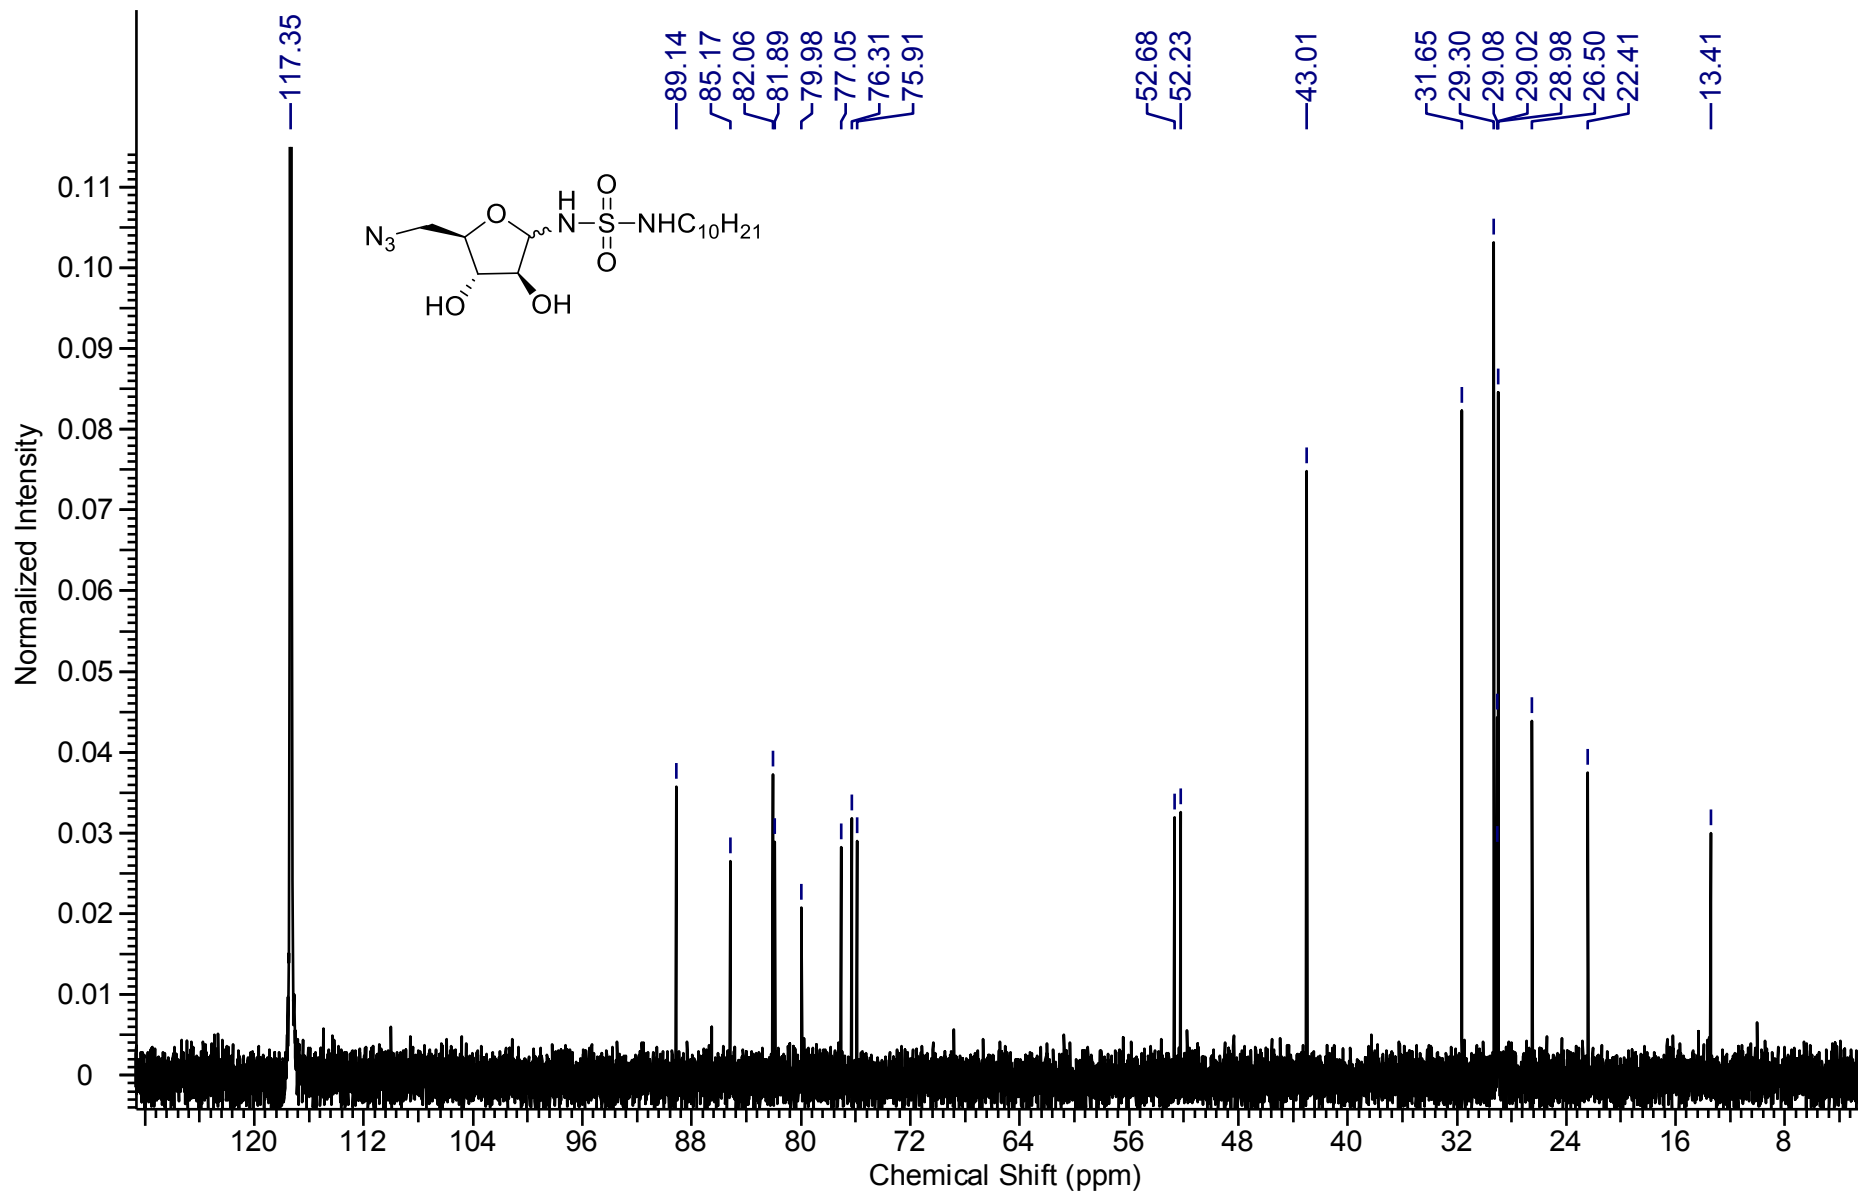

***N*-(Octyl)-*N'*-(5-fluoro- $\alpha,\beta$ -D-arabinofuranosyl)sulfamide 8a**

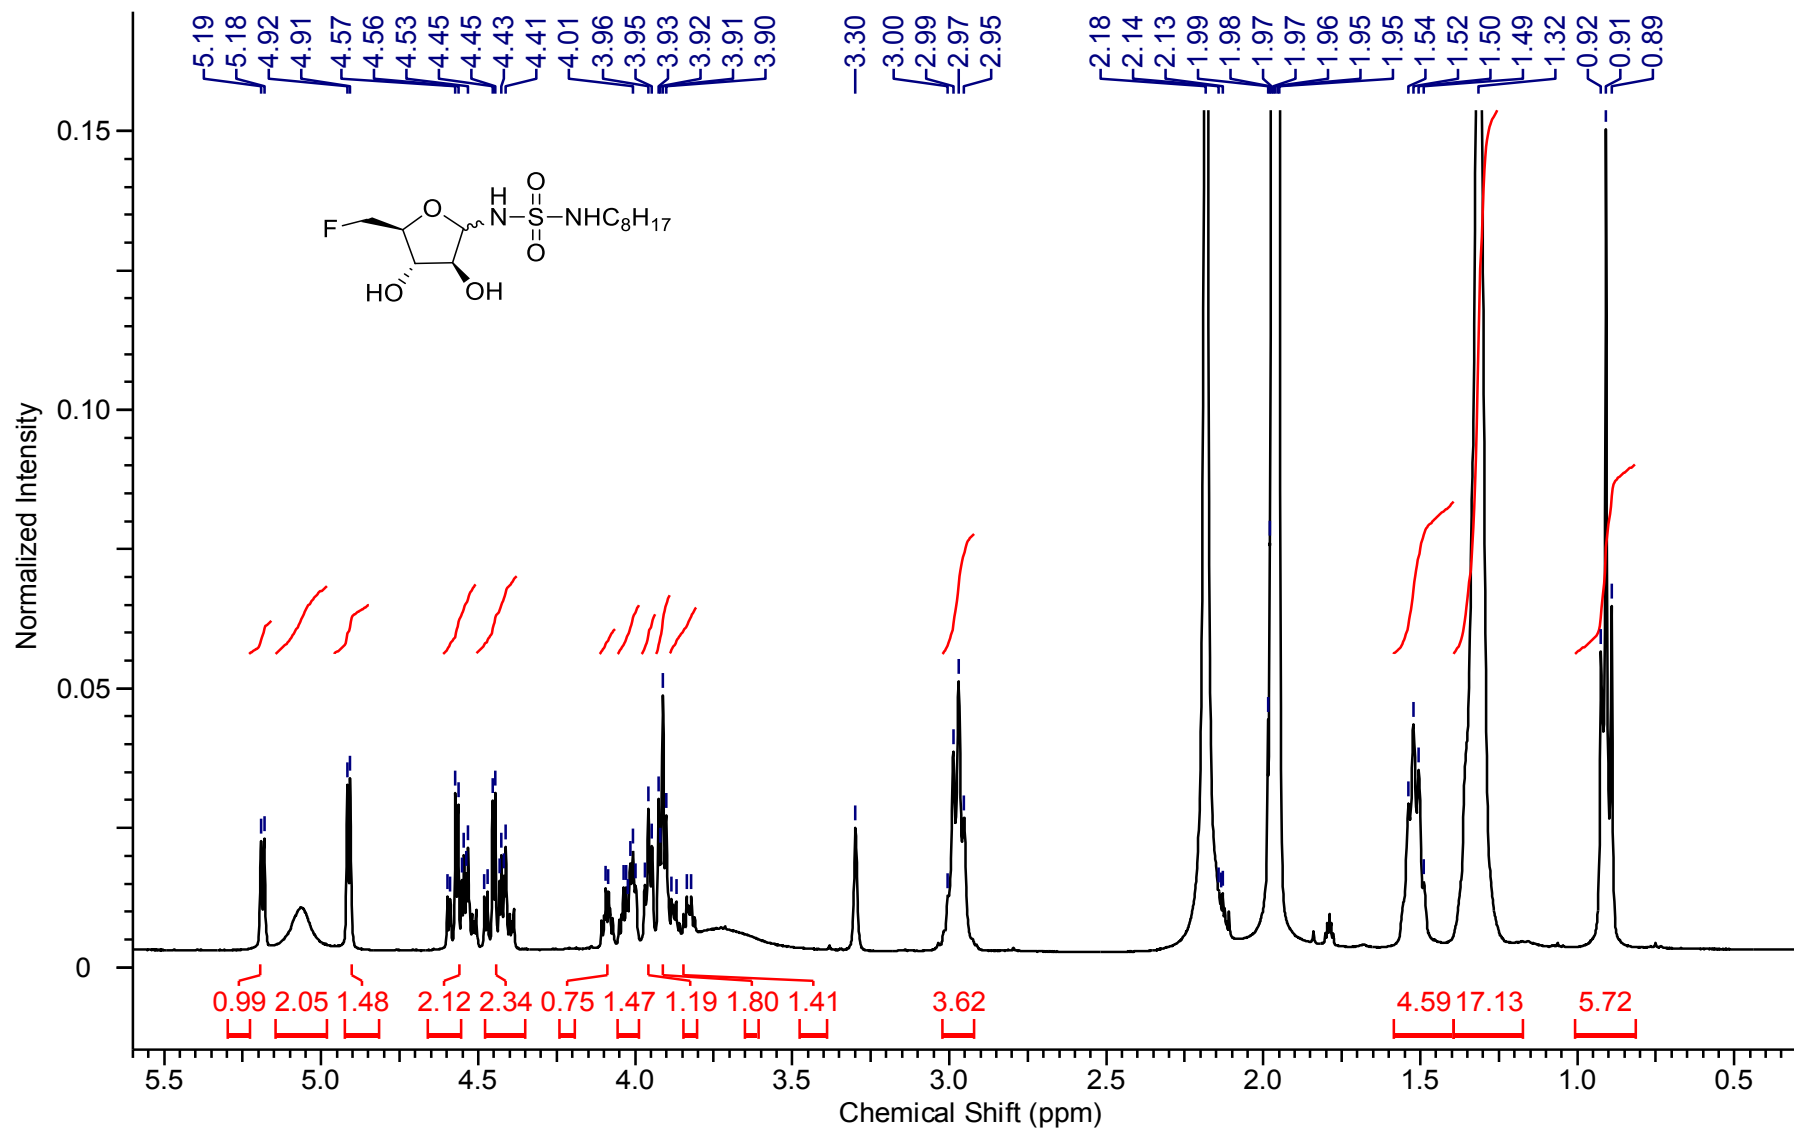

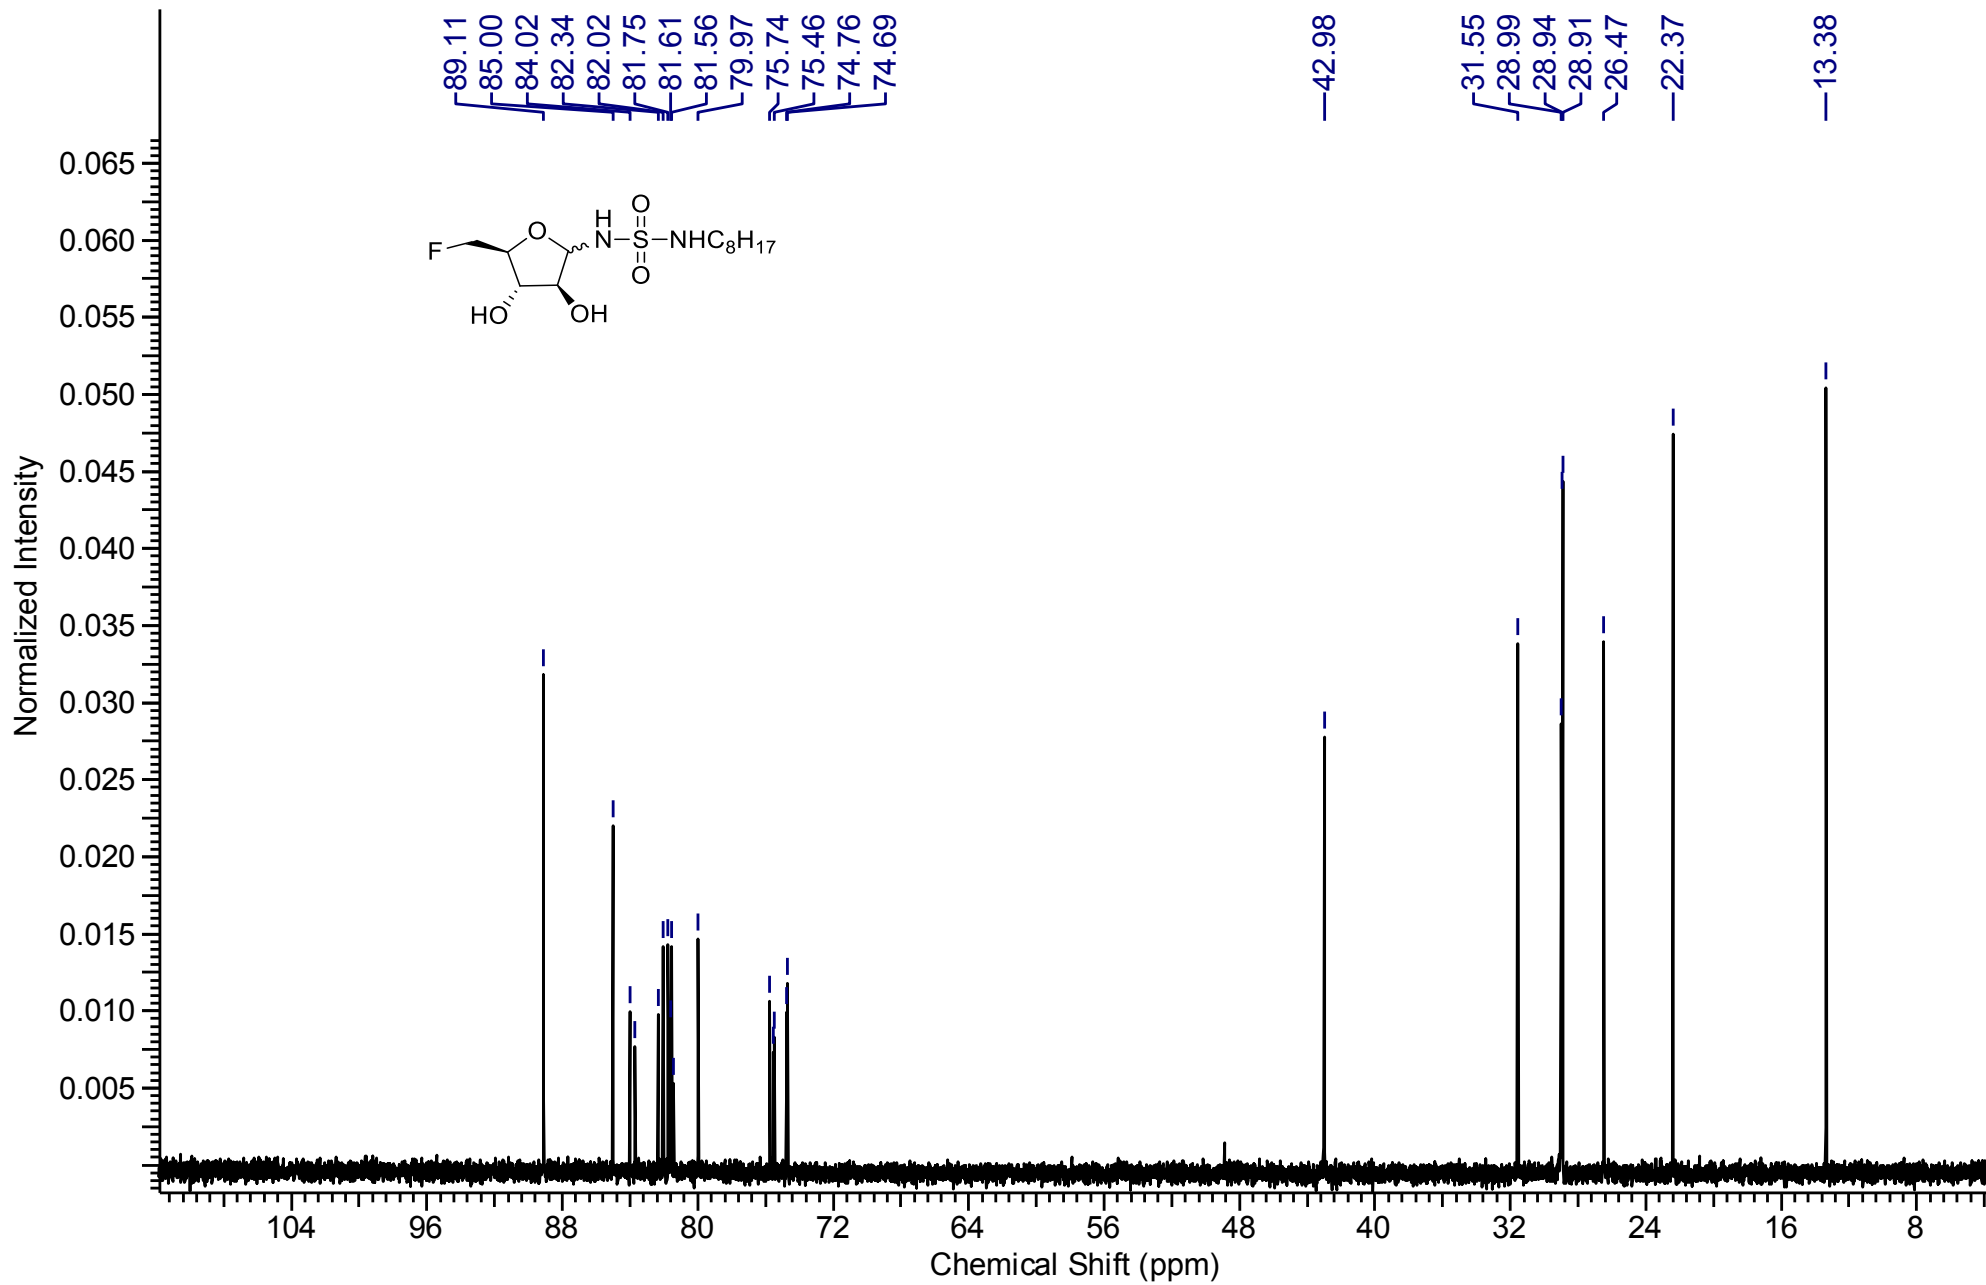

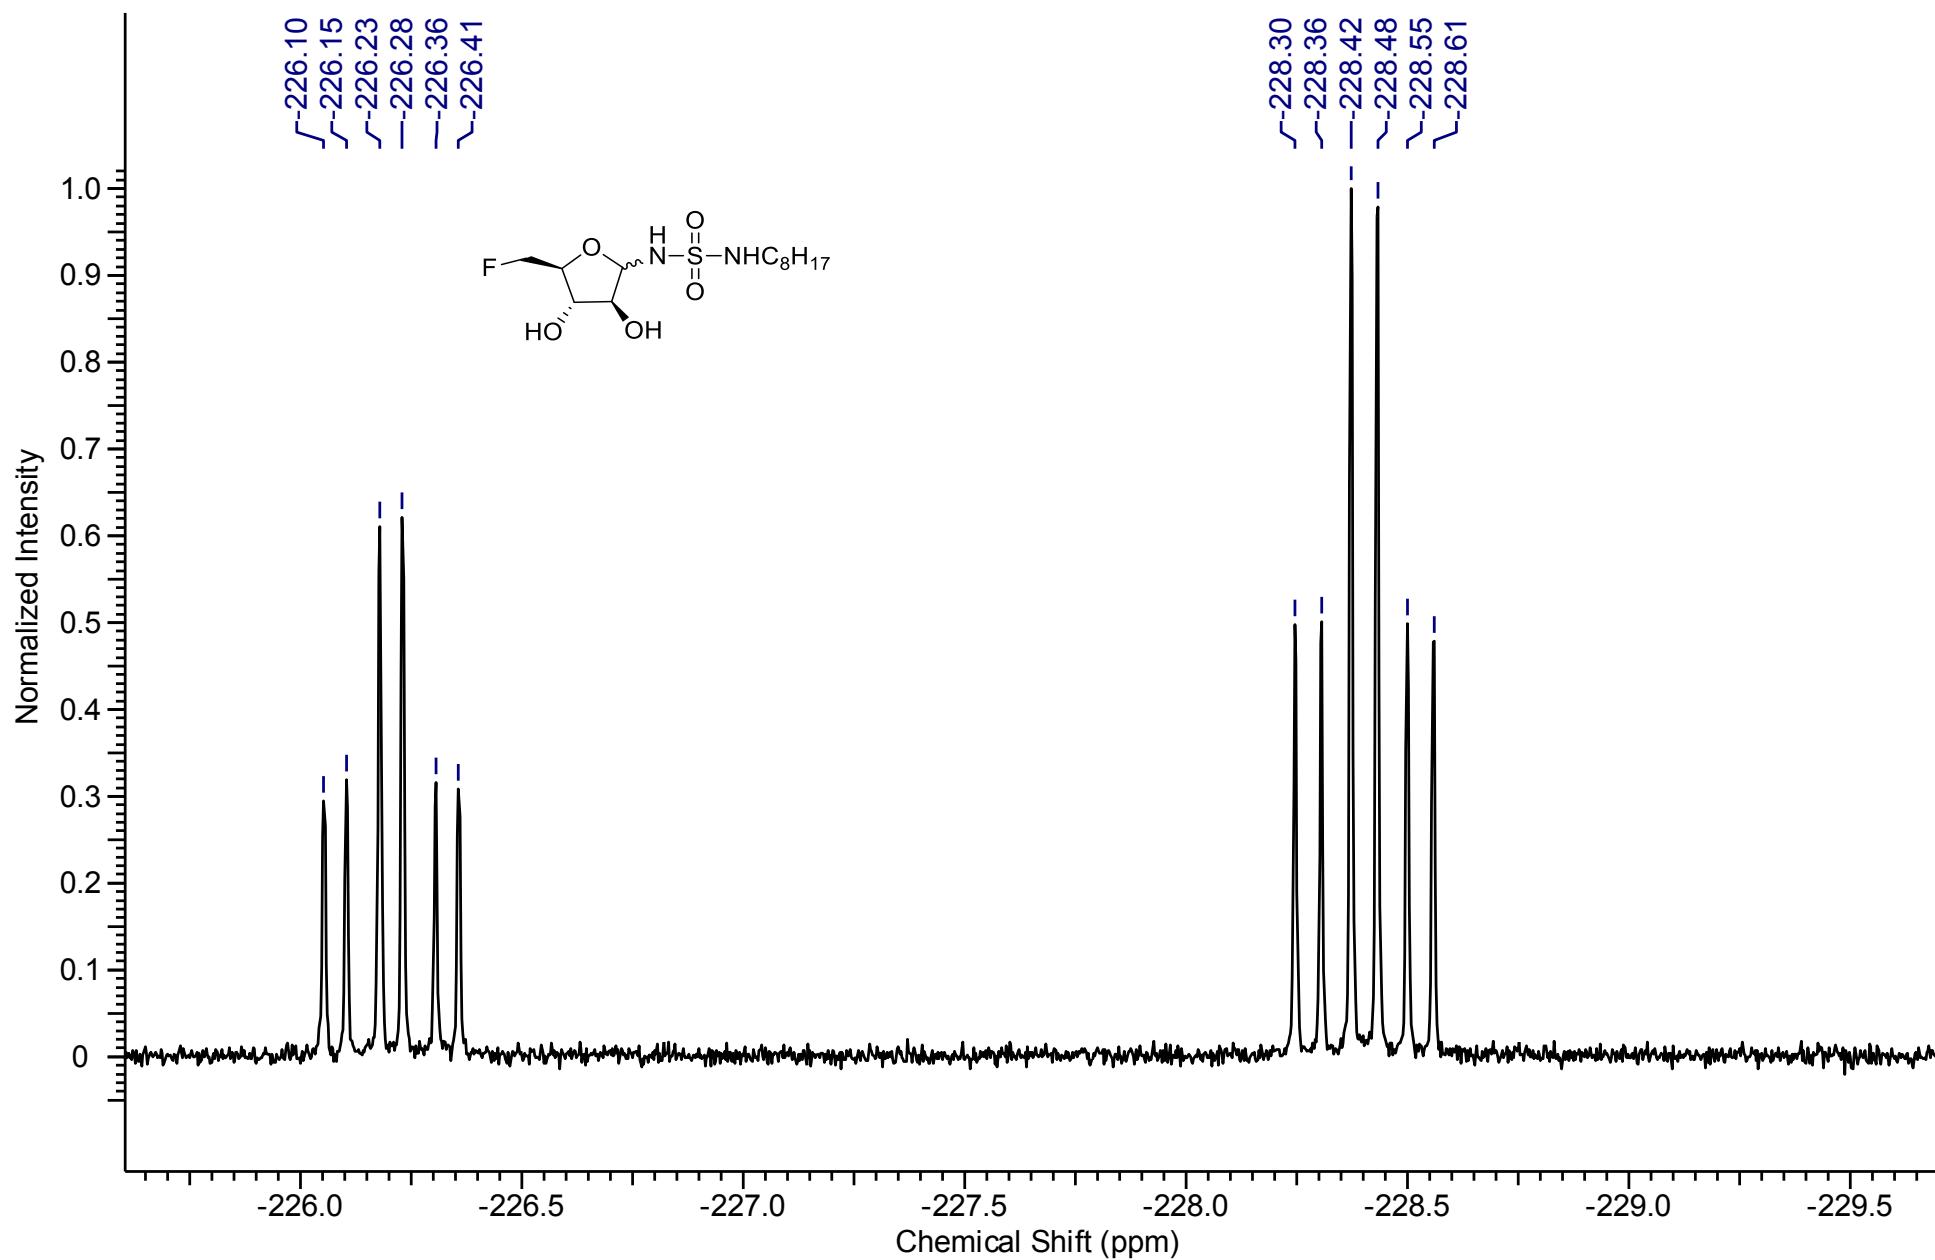



***N*-(Decyl)-*N'*-(5-fluoro- $\alpha,\beta$ -D-arabinofuranosyl)sulfamide 8b**

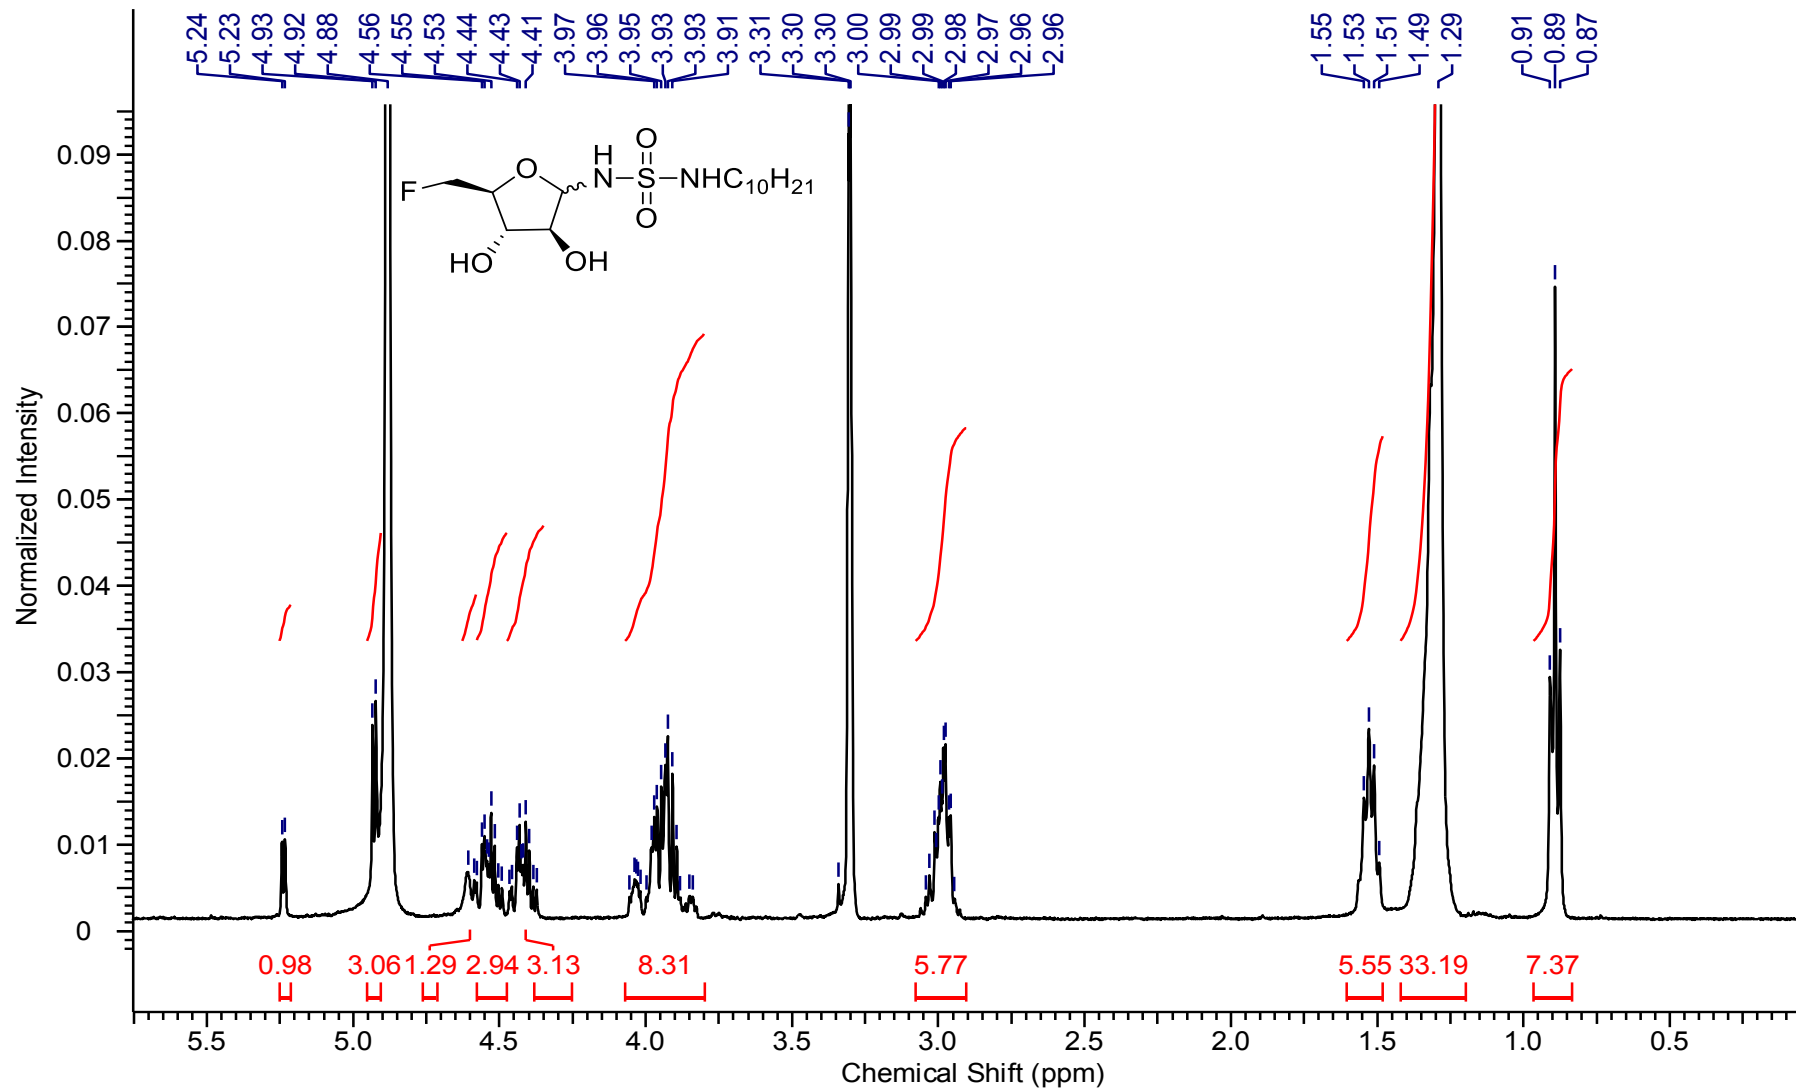

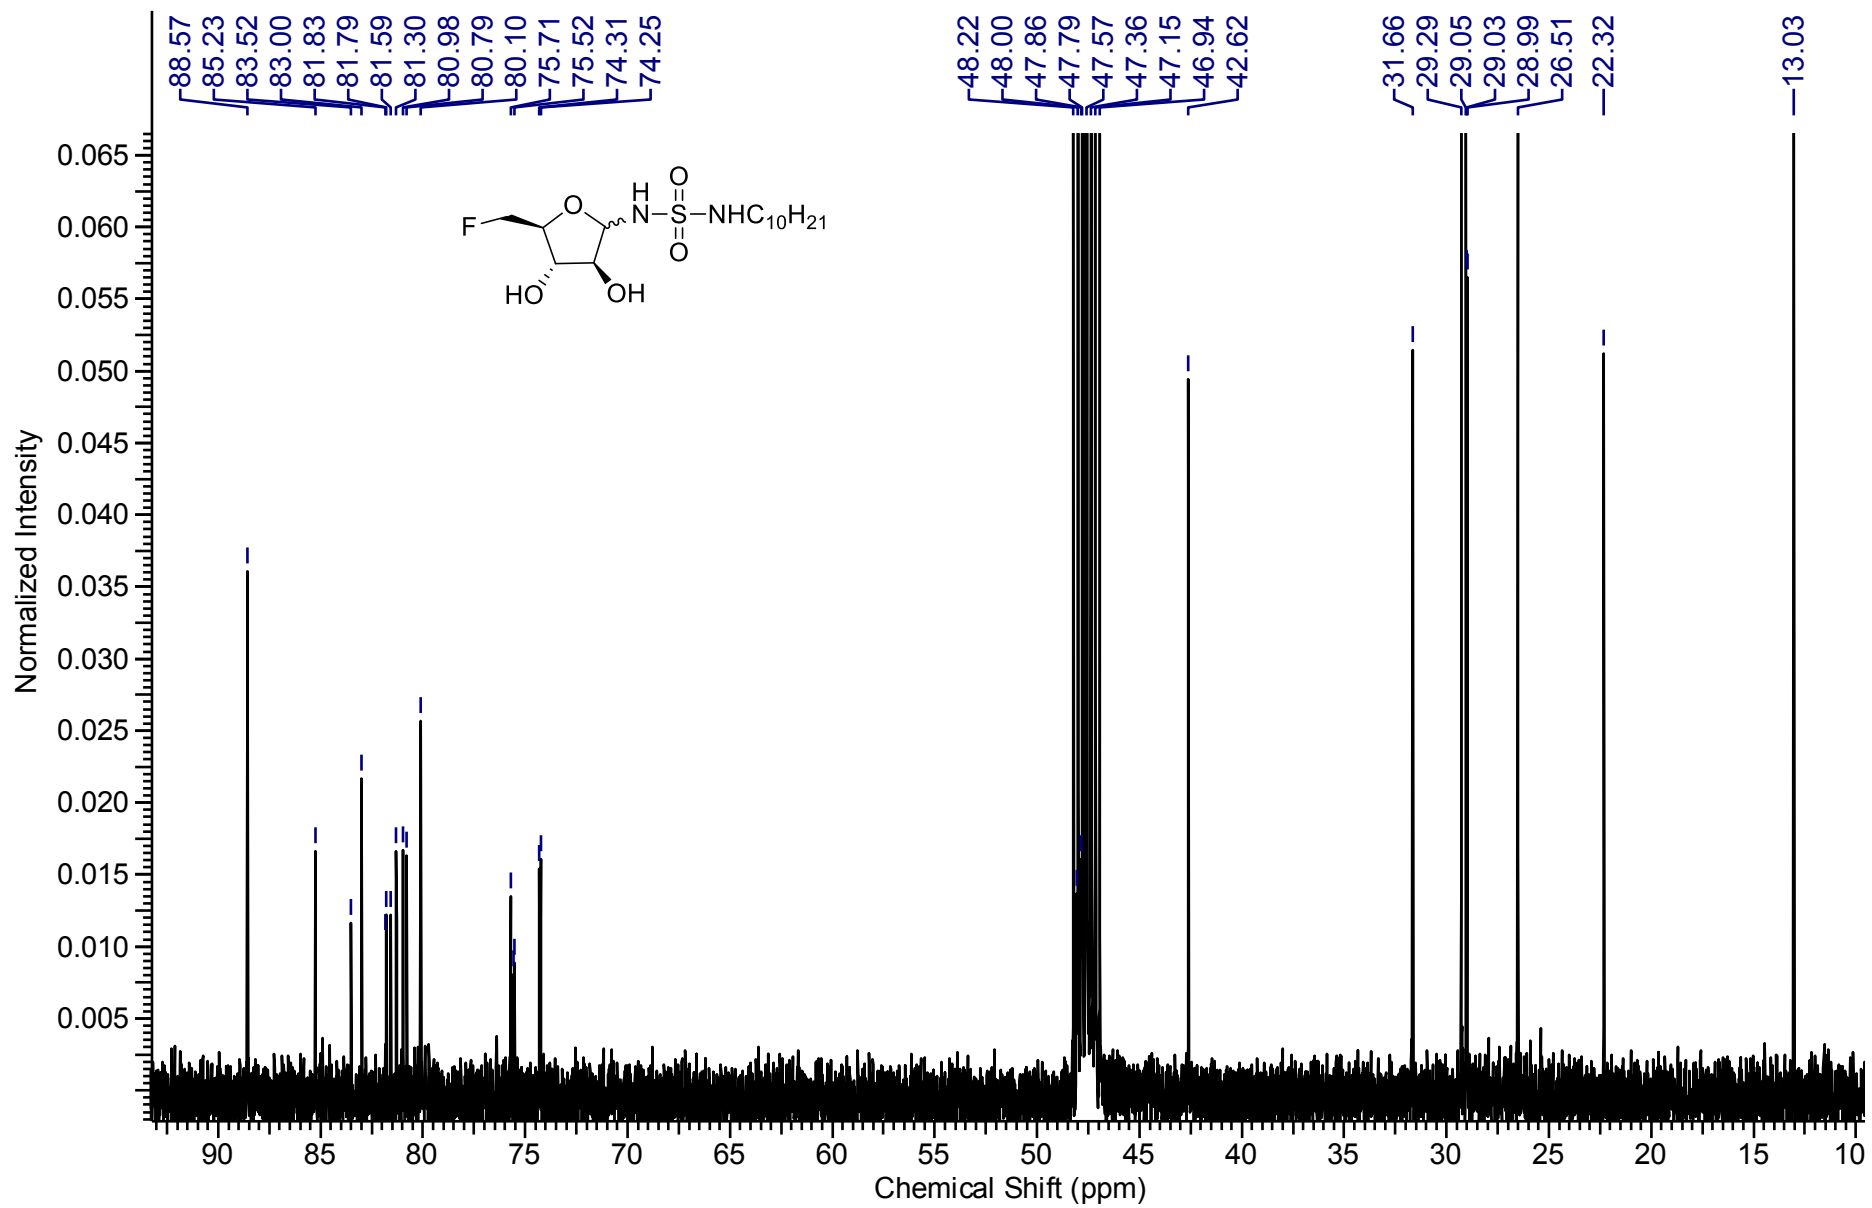

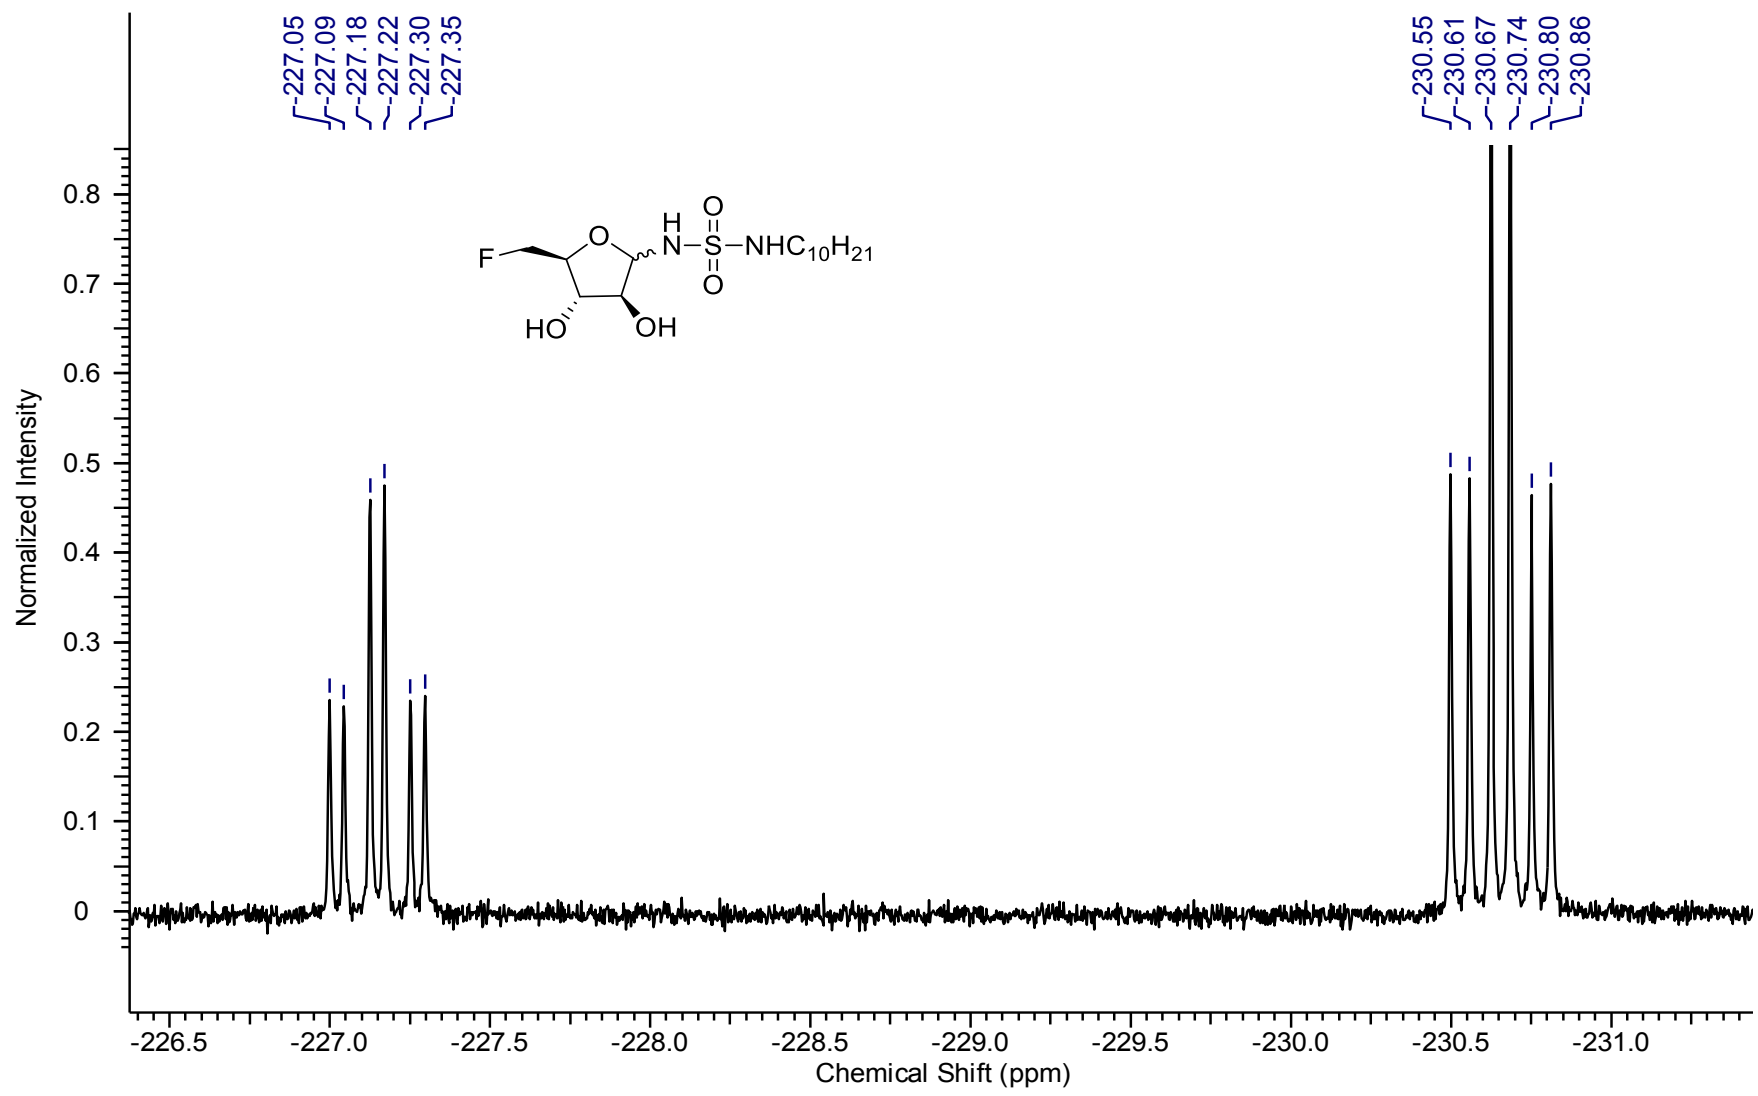

***N*-(Dodecyl)-*N'*-(5-fluoro- $\alpha,\beta$ -D-arabinofuranosyl)sulfamide **8c****

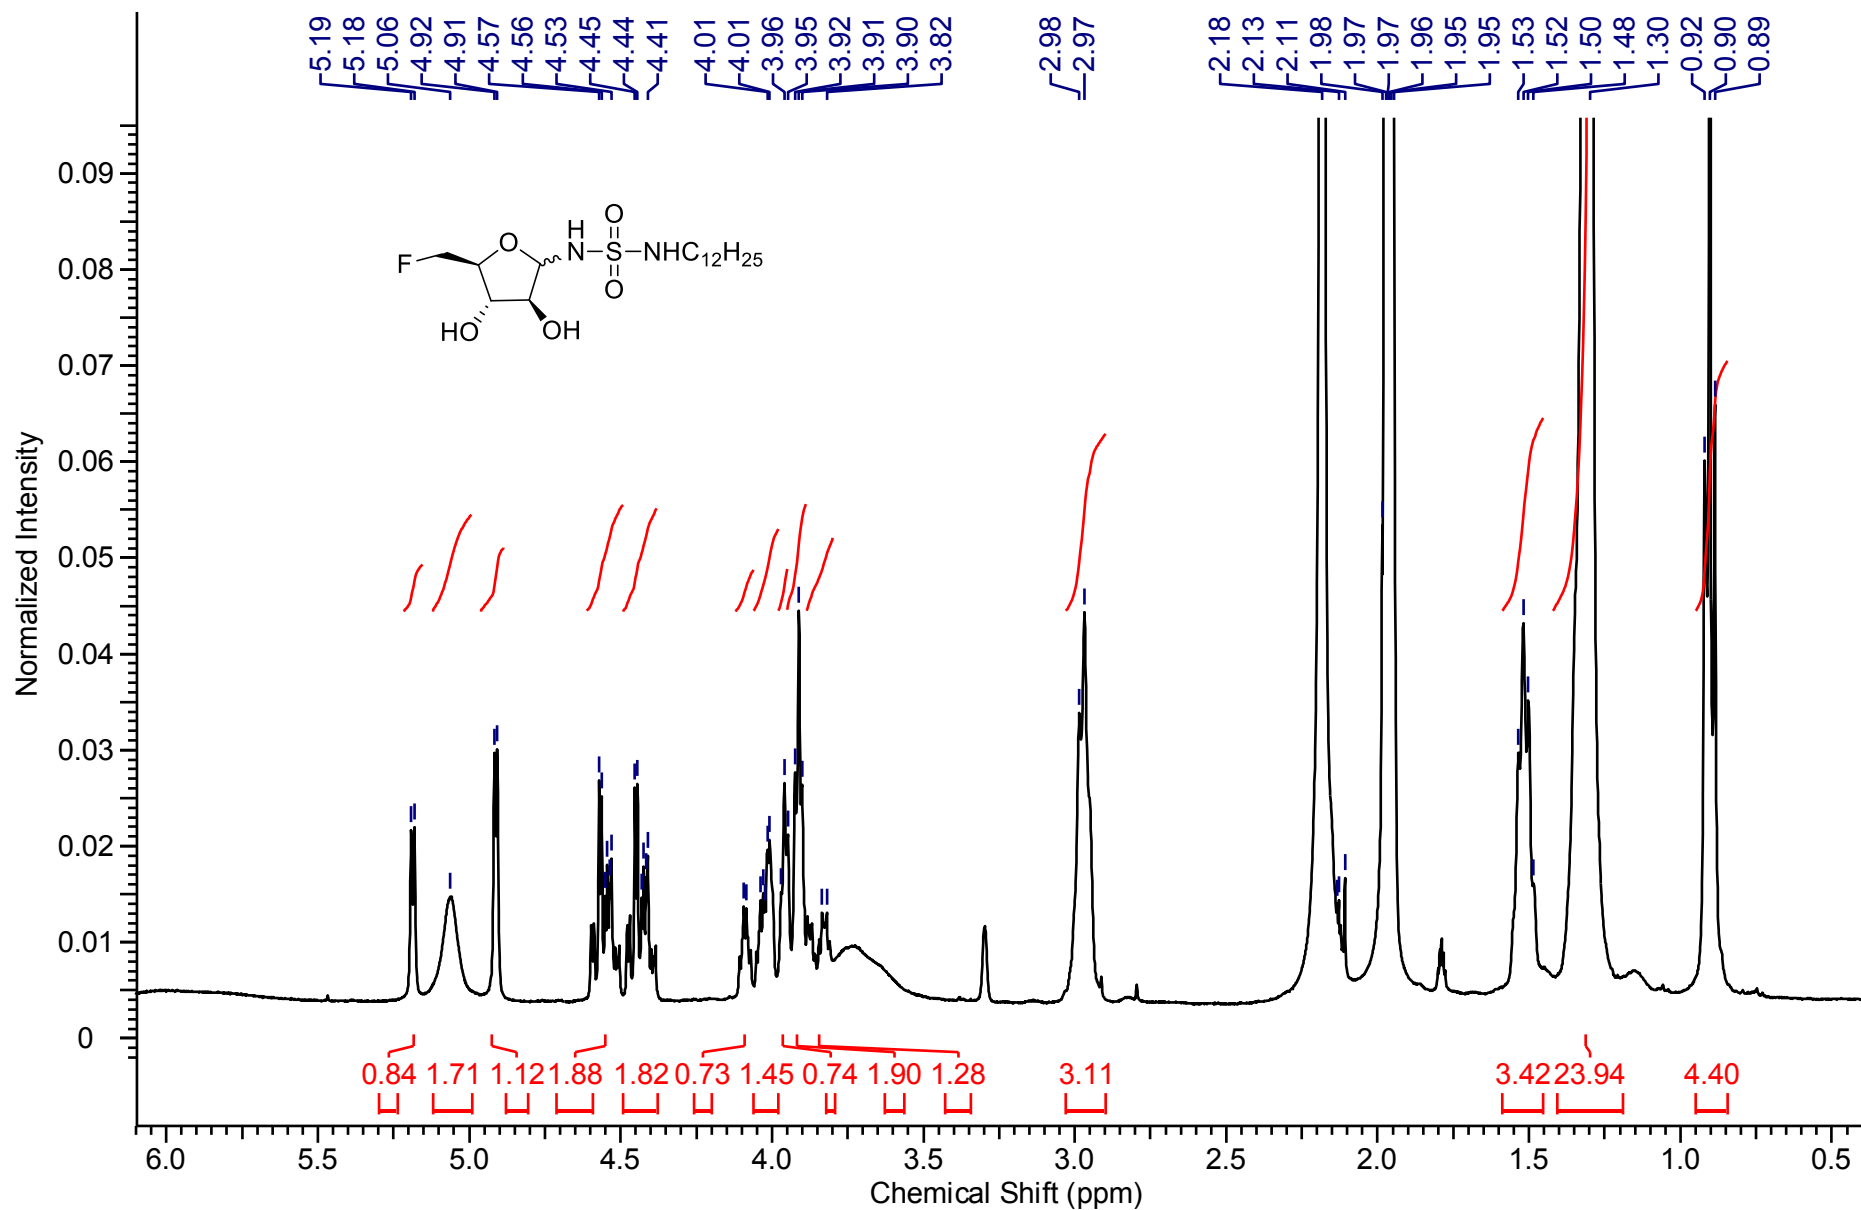

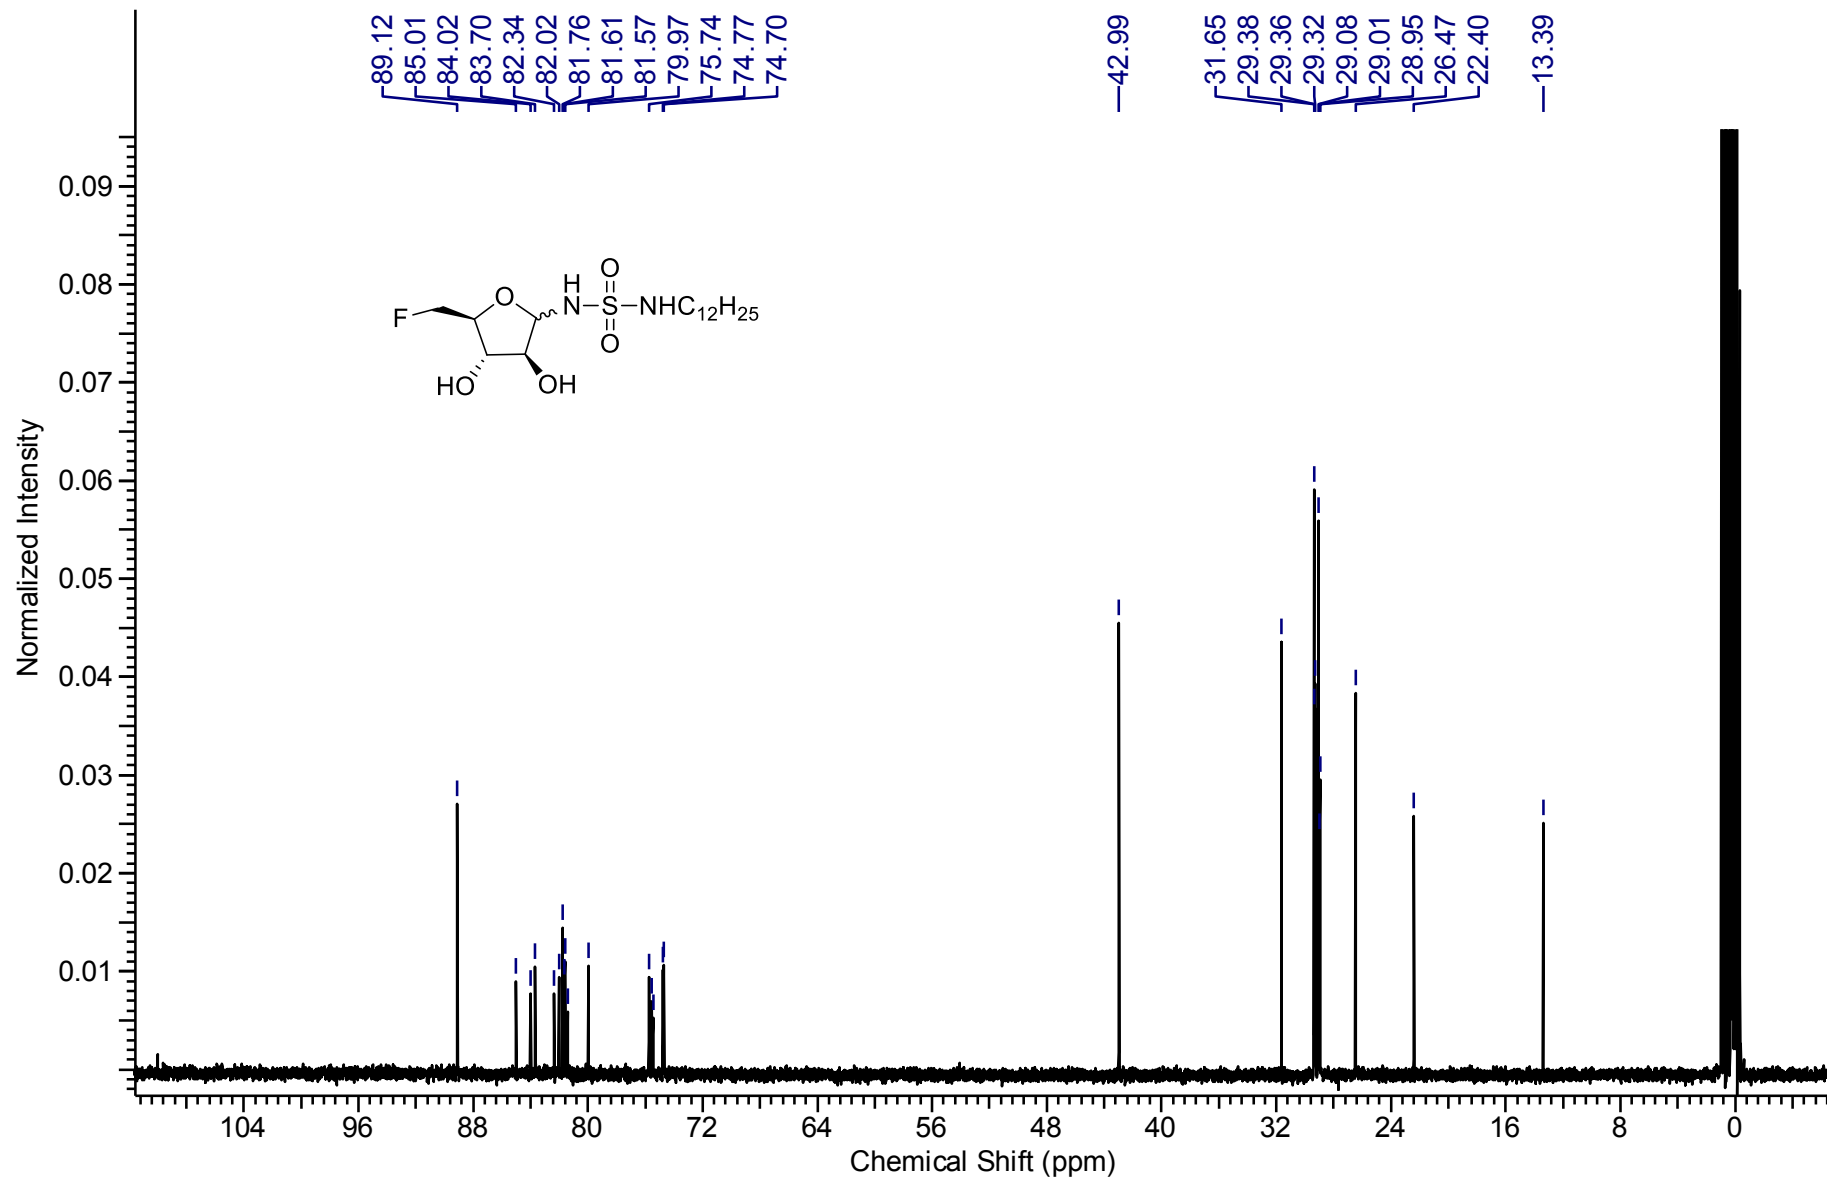

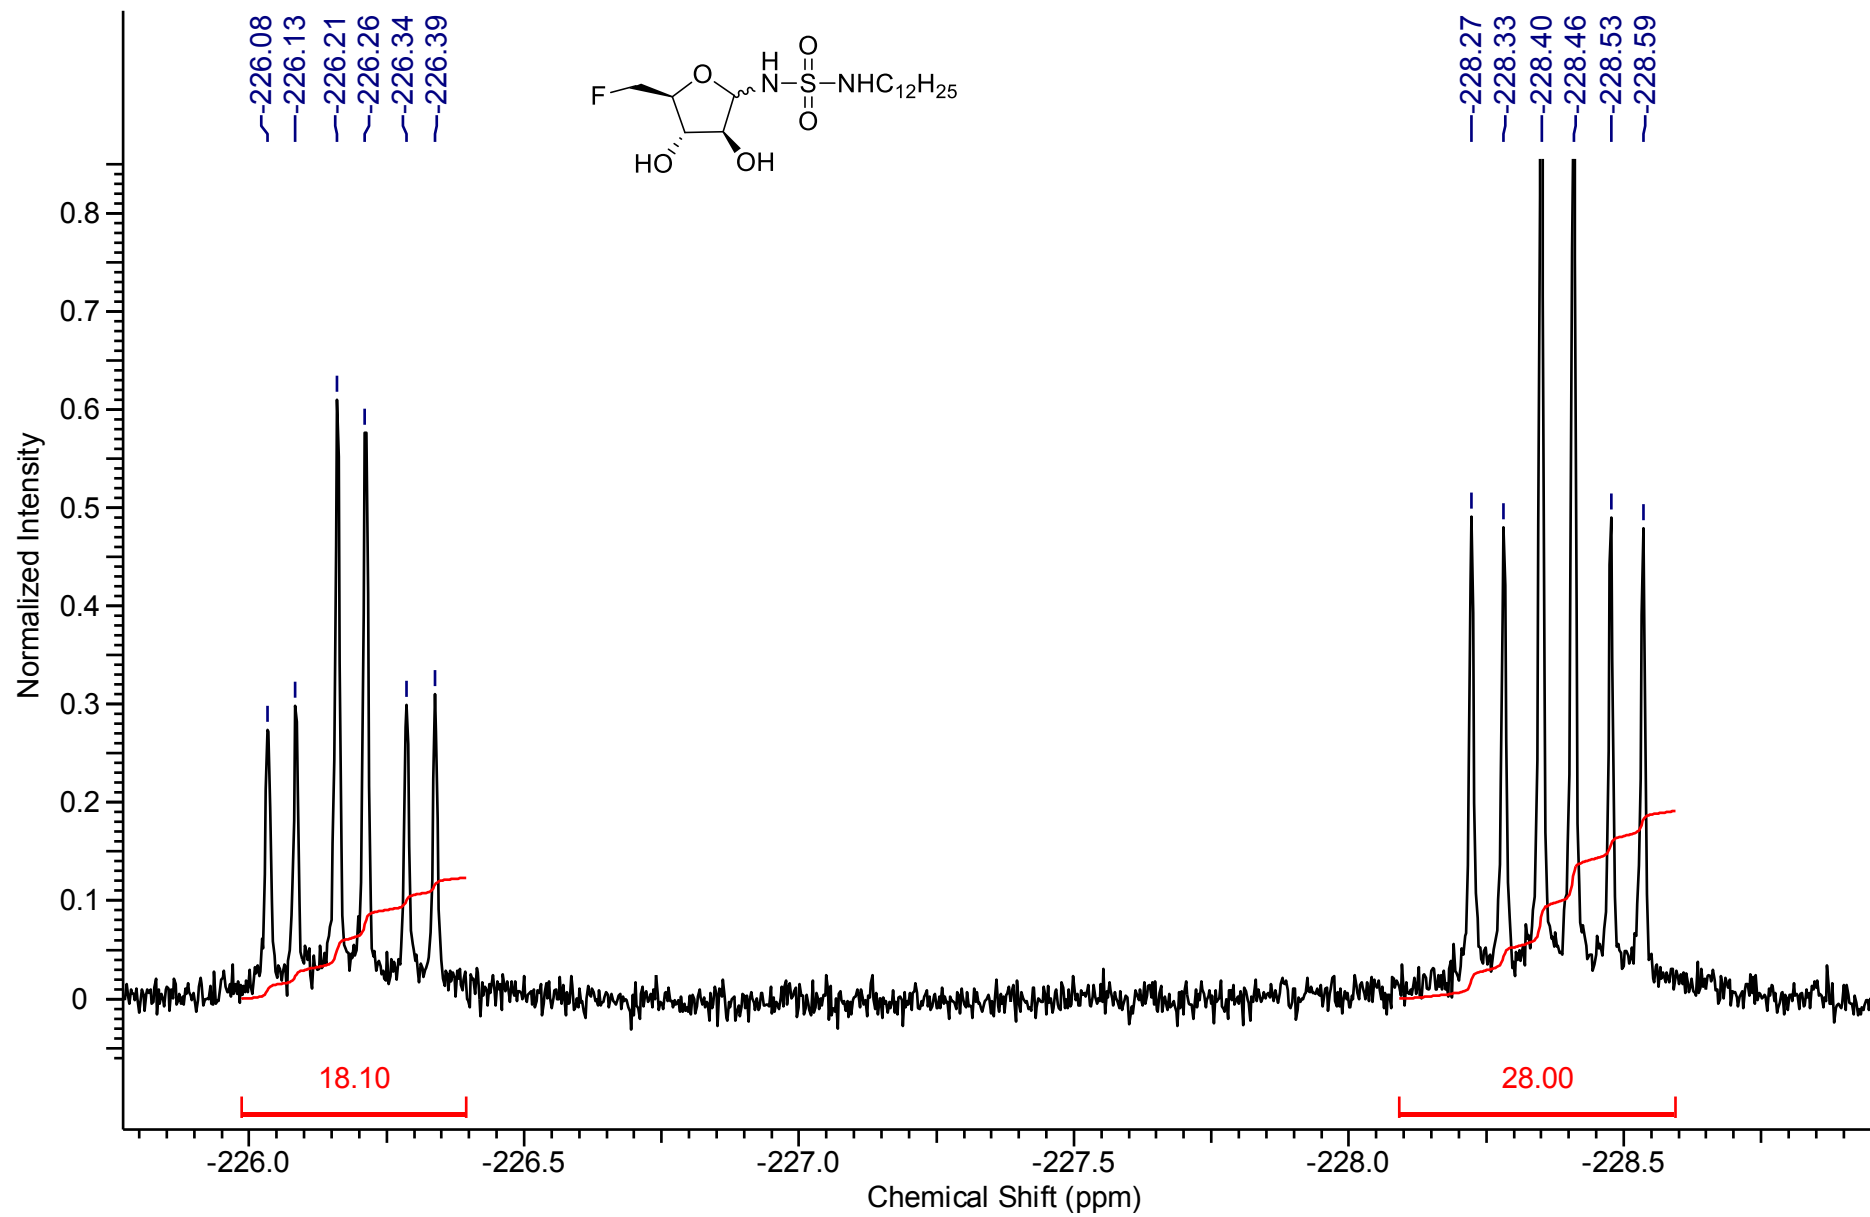

Supplement: c5ob02317c1.pdf [file c5ob02317c1.pdf]
